# Supplementary material for: Multicomponent synthesis of α-branched amines using organozinc reagents generated from alkyl bromides
Source: publisher site journal article supplement (doi:10.3762/bjoc.20.239), 2024-11-07

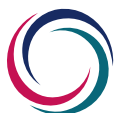

## Supporting Information

for

### **Multicomponent synthesis of $\alpha$ -branched amines using organozinc reagents generated from alkyl bromides**

Baptiste Leroux, Alexis Beaufile, Federico Banchini, Olivier Jackowski, Alejandro Perez-Luna, Fabrice Chemla, Marc Presset and Erwan Le Gall

*Beilstein J. Org. Chem.* **2024**, *20*, 2834–2839. [doi:10.3762/bjoc.20.239](https://doi.org/10.3762/bjoc.20.239)

### **Experimental procedures, compound characterization data, and NMR spectra for all compounds**

## Table of contents

|                                                                                  |     |
|----------------------------------------------------------------------------------|-----|
| 1. General information.....                                                      | S2  |
| 2. Prices/availability of aliphatic iodides vs bromides .....                    | S2  |
| 3. Formation and reactivity of organozinc reagents generated in THF or MeCN..... | S3  |
| 4. Organozinc reagents .....                                                     | S4  |
| 5. Mannich reactions .....                                                       | S5  |
| 6. Copies of NMR spectra .....                                                   | S10 |

# 1. General information

- All commercially available reagents, including solvents (tetrahydrofuran THF, 2-methyltetrahydrofuran = 2-MeTHF, cyclohexane = Cy, ethyl acetate = EA), were used as received.
- Room temperature means 18 – 25 °C.
- Analytical thin layer chromatography (TLC) was performed on TLC silica gel plates (0.25 mm) precoated with a fluorescent indicator. Visualization was effected using ultraviolet light ( $\lambda = 254$  nm) and/or a aqueous solution of  $\text{KMnO}_4$ . Flash chromatography (FC) was performed on 40–63  $\mu\text{m}$  silica gel with mixtures of solvents.
- High-resolution mass spectra were obtained at the ICOA of the Université of Orléans by electrospray ionization using a Q-TOF analyzer.
- NMR spectra were recorded on a 400 MHz spectrometer.  $^1\text{H}$  NMR chemical shifts were referenced to the residual solvent signal;  $^{13}\text{C}$  NMR chemical shifts were referenced to the deuterated solvent signal. Multiplicity was defined by DEPT 135 analysis. Data are presented as follows: chemical shift  $\delta$  (ppm), multiplicity ( $s$  = singlet,  $d$  = doublet,  $t$  = triplet,  $q$  = quartet,  $m$  = multiplet,  $br$  = broad), coupling constant  $J$  (Hz), integration.
- $dr$  was determined by NMR analysis of the crude reaction mixture.
- Compounds **5aaa**,<sup>1</sup> **5aba**,<sup>1</sup> **5fba**,<sup>2</sup> **5haa**,<sup>1</sup> **5hda**,<sup>1</sup> **5hag**,<sup>1</sup> **5hah**,<sup>1</sup> **5iaa**<sup>1</sup> and **5kaa**<sup>1</sup> have been previously described.

# 2. Prices/availability of aliphatic iodides vs bromides

Prices (France) for common aliphatic iodides and bromides, reported from the Sigma-Aldrich web site (<https://www.sigmaaldrich.com/FR/fr>).

| Compound                                                                           | Amount        | Price    | Quality       | Stabilization |
|------------------------------------------------------------------------------------|---------------|----------|---------------|---------------|
|   | 100 g         | 51.00 €  | 99%           | Copper        |
|  | 100 g         | 28.00 €  | 99%           |               |
|  | 100 mL        | 76.30 €  | For synthesis |               |
|  | 100 mL        | 27.10 €  | For synthesis |               |
|  | 100 g         | 343.00 € | 98%+          | Copper        |
|  | 100 g         | 38.40 €  | 98%           |               |
|  | 100 g         | 356.00 € | 95%           | Copper        |
|  | 100 g         | 86.10 €  | 98%           |               |
|  | 100 g         | 71.30 €  | 98%           |               |
|  | 100 g         | 28.00 €  | 98%           |               |
|  | Not available | -        | -             |               |
|  | 25 g          | 183.00 € | 95%           |               |
|  | 25 mL (~42 g) | 444.00 € | 97%           |               |

<sup>1</sup> M. Pinaud, E. Le Gall, M. Presset, *J. Org. Chem.* **2022**, *87*, 4961–4964.

<sup>2</sup> T. Hou, P. Lu, P. Li, *Tetrahedron Lett.* **2016**, *57*, 2273–2276.

|                                                                                  |               |          |      |  |
|----------------------------------------------------------------------------------|---------------|----------|------|--|
| 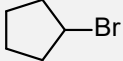  | 25 mL         | 37.00 €  | 98%+ |  |
|  | 100 g         | 75.00 €  | 98%+ |  |
|  | 100 g         | 23.10 €  | 98%  |  |
|  | 100 g         | 249.00 € | 98%  |  |
|  | 100 g         | 31.20 €  | 98%  |  |
|  | 50 g          | 52.80 €  | 98%  |  |
|  | 100 g         | 53.40 €  | 99%  |  |
|  | Not available | -        | -    |  |
|  | 25 g          | 92.80 €  | 97%  |  |

### 3. Formation and reactivity of organozinc reagents generated in THF or MeCN

Comparison of the preparation and reactivity in the Mannich reaction of organozinc compounds originating from primary alkyl bromides (reaction in THF described herein) and alkyl iodides (reaction in MeCN as described in JOC 2022).

| Entry | Alkyl halide                                                                        | Organozinc (iodolysis) | yield | Mannich adduct                                                                       | Yield |
|-------|-------------------------------------------------------------------------------------|------------------------|-------|--------------------------------------------------------------------------------------|-------|
| 1     | 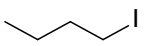 | 19%                    |       |  | NR    |
| 2     |  | -                      |       |  | NR    |
| 3     |  | 62%                    |       |  | NR    |
| 4     |  | 99%                    |       |  | NR    |
| 5     |  | 60%                    |       |  | NR    |

|    |  |     |  |     |
|----|--|-----|--|-----|
| 6  |  | 68% |  | 56% |
| 7  |  | 68% |  | 68% |
| 8  |  | 76% |  | 56% |
| 9  |  | 61% |  | 41% |
| 10 |  | 66% |  | 59% |

#### 4. Organozinc reagents

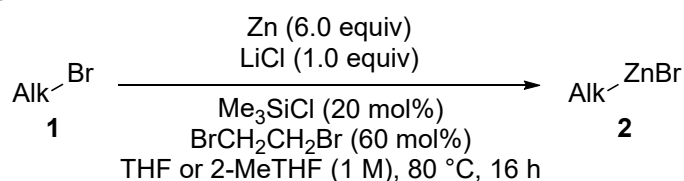

In air, a 30 mL reaction tube equipped with a stir bar was charged with zinc dust (3.92 g, 60 mmol, 6.0 equiv) and LiCl (0.42 g, 10 mmol, 1.0 equiv) and purged with Ar. THF or 2-MeTHF (10 mL, C = 0.5 M) was added and the resulting suspension was treated with chlorotrimethylsilane (0.25 mL, 2 mmol, 20 mol %) and stirred at room temperature for 2 min. 1,2-dibromoethane (0.52 mL, 6 mmol, 60 mol %) was added dropwise and the resulting suspension was at room temperature for 5 min. The alkyl bromide 1 (10 mmol, 1.0 equiv) was added and the reaction was stirred at 80 °C for 16 h. After cooling to room temperature, the solution was centrifugated at 3500 rpm for 15 min. The concentration of the solution of organozinc reagent was determined by iodometric titration of the resulting supernatant.

|                             |    |    |    |    |
|-----------------------------|----|----|----|----|
| <b>Organozinc reagent</b>   |    |    |    |    |
| <b>Yield in THF (%)</b>     | 71 | -  | 76 | 63 |
| <b>Yield in 2-MeTHF (%)</b> | 66 | 68 | -  | 77 |
| <b>Organozinc reagent</b>   |    |    |    |    |
| <b>Yield in THF (%)</b>     | -  | -  | -  |    |
| <b>Yield in 2-MeTHF (%)</b> | 61 | 37 | 66 |    |

|                      |                                                                                  |                                                                                  |                                                                                    |                                                                                    |
|----------------------|----------------------------------------------------------------------------------|----------------------------------------------------------------------------------|------------------------------------------------------------------------------------|------------------------------------------------------------------------------------|
| Organozinc reagent   | 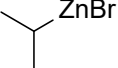 |  |  |  |
| Yield in THF (%)     | 55                                                                               | 69                                                                               | -                                                                                  | 14                                                                                 |
| Yield in 2-MeTHF (%) | -                                                                                | -                                                                                | 56                                                                                 | -                                                                                  |

## 5. Mannich reactions

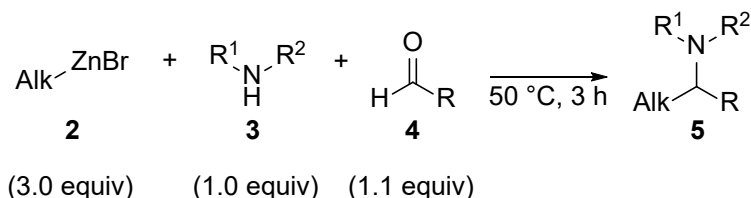

**General procedure (GP):** A 30 mL reaction tube equipped with a stir bar and filled with an Ar atmosphere was charged with aldehyde (1.1 equiv) and amine (1.0 equiv). A solution of the organozinc reagent (3.0 equiv) was added and the reaction was stirred at 50 °C for 3 h. Then, the reaction mixture was cooled down to room temperature and poured into sat aq NH<sub>4</sub>Cl. The resulting solution was extracted twice with EtOAc and the combined organic layers were washed brine, dried over anhydrous Na<sub>2</sub>SO<sub>4</sub> and evaporated. The crude product was purified by FC to afford the desired product.

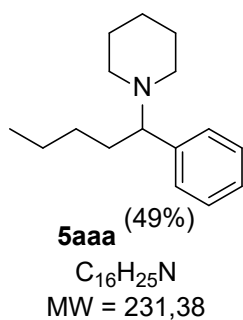

Compound **5aaa**:<sup>1</sup> Following the **GP** performed with piperidine (73 μL, 0.73 mmol, 1.0 equiv), benzaldehyde (82 μL, 0.81 mmol, 1.1 equiv) and a solution of alkylzinc bromide in THF (3.5 mL, 0.63 M, 2.20 mmol, 3.0 equiv), the desired product was obtained after purification by FC [V(SiO<sub>2</sub>) = 25 mL, Cy/EA : 9/1 (100 mL), 8/2 (150 mL)] as a pale yellow oil (83 mg, 49%).

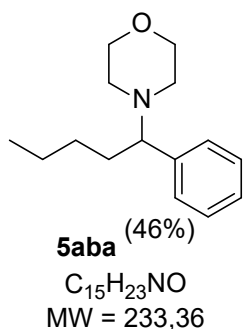

Compound **5aba**:<sup>1</sup> Following the **GP** performed with morpholine (67 μL, 0.77 mmol, 1.0 equiv), benzaldehyde (86 μL, 0.85 mmol, 1.1 equiv) and a solution of alkylzinc bromide in 2-MeTHF (3.5 mL, 0.66 M, 2.31 mmol, 3.0 equiv), the desired product was obtained after purification by FC [V(SiO<sub>2</sub>) = 25 mL, Cy/EA : 9/1 (150 mL), 8/2 (100 mL)] as a colorless oil (82 mg, 46%).

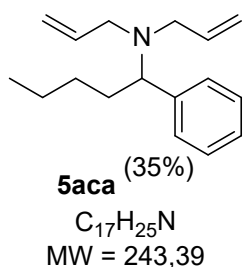

Compound **5aca**: Following the **GP** performed with diallylamine (75 μL, 0.61 mmol, 1.0 equiv), benzaldehyde (68 μL, 0.67 mmol, 1.1 equiv) and a solution of alkylzinc bromide in THF (3 mL, 0.61 M, 1.82 mmol, 3.0 equiv), the desired product was obtained after purification by FC [V(SiO<sub>2</sub>) = 25 mL, Cy/EA : 9.5/0.5 (150 mL), 9/1 (100 mL)] as a colorless oil (52 mg, 35%).

R<sub>f</sub> (SiO<sub>2</sub>, Cy/EA : 9/1): 0.63.

HRMS (ESI<sup>+</sup>): m/z [M+H]<sup>+</sup> Calcd. for C<sub>17</sub>H<sub>26</sub>N: 244.2060. Found: 244.2063.

**<sup>1</sup>H NMR (400 MHz, CDCl<sub>3</sub>):** δ 7.41 – 7.37 (m, 2H), 7.33 – 7.29 (m, 3H), 5.95 – 5.85 (m, 2H), 5.25 – 5.17 (m, 4H), 3.78 (dd, *J* = 8.6, 6.1 Hz, 1H), 3.35 (dd, *J* = 14.4, 4.9 Hz, 2H), 2.85 (dd, *J* = 14.4, 7.5 Hz, 2H), 2.01 – 1.93 (m, 1H), 1.86 – 1.78 (m, 1H), 1.40 – 1.30 (m, 3H), 1.24 – 1.16 (m, 1H), 0.93 (t, *J* = 7.1 Hz, 3H).

**<sup>13</sup>C{<sup>1</sup>H} NMR (100 MHz, CDCl<sub>3</sub>):** δ 140.5 (C), 137.2 (2 CH), 128.9 (2 CH), 128.0 (2 CH), 126.9 (CH), 116.8 (2 CH<sub>2</sub>), 63.5 (CH), 52.8 (2 CH<sub>2</sub>), 32.1 (CH<sub>2</sub>), 29.1 (CH<sub>2</sub>), 22.9 (CH<sub>2</sub>), 14.2 (CH<sub>3</sub>).

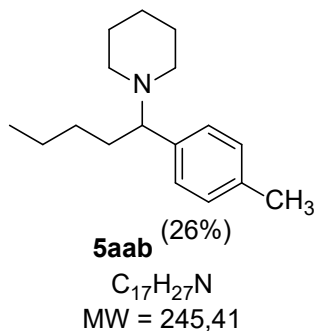

Compound **5aab**: Following the **GP** performed with piperidine (60 μL, 0.61 mmol, 1.0 equiv), *p*-toluialdehyde (79 μL, 0.67 mmol, 1.1 equiv) and a solution of alkylzinc bromide in THF (3 mL, 0.61 M, 1.82 mmol, 3.0 equiv), the desired product was obtained after purification by FC [V(SiO<sub>2</sub>) = 25 mL, Cy/EA : 9/1 (150 mL), 8/2 (100 mL)] as a colorless oil (39 mg, 26%).

**R<sub>f</sub> (SiO<sub>2</sub>, Cy/EA : 9/1):** 0.08.

**HRMS (ESI+):** *m/z* [M+H]<sup>+</sup> Calcd. for C<sub>17</sub>H<sub>28</sub>N: 246.2216. Found: 246.2220.

**<sup>1</sup>H NMR (400 MHz, CDCl<sub>3</sub>):** δ 7.13 (d, *J* = 8.0 Hz, 2H), 7.09 (d, *J* = 8.0 Hz, 2H), 3.29 (dd, *J* = 9.5, 5.0 Hz, 1H), 2.35 (br s, 7H), 1.91 – 1.75 (m, 2H), 1.60 – 1.48 (m, 4H), 1.39 – 1.22 (m, 4H), 1.15 – 1.00 (m, 2H), 0.83 (t, *J* = 7.3 Hz, 3H).

**<sup>13</sup>C{<sup>1</sup>H} NMR (100 MHz, CDCl<sub>3</sub>):** δ 134.0 (C), 136.3 (C), 128.96 (2 CH), 128.6 (2 CH), 70.4 (CH), 51.3 (2 CH<sub>2</sub>), 32.6 (CH<sub>2</sub>), 29.1 (CH<sub>2</sub>), 26.5 (2 CH<sub>2</sub>), 24.8 (CH<sub>2</sub>), 23.0 (CH<sub>2</sub>), 21.2 (CH<sub>3</sub>), 14.2 (CH<sub>3</sub>).

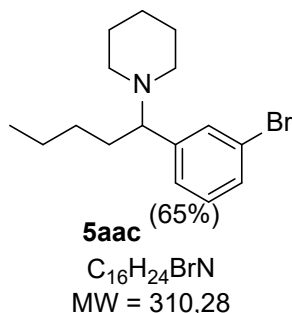

Compound **5aac**: Following the **GP** performed with piperidine (73 μL, 0.73 mmol, 1.0 equiv), 3-bromobenzaldehyde (94 μL, 0.81 mmol, 1.1 equiv) and a solution of alkylzinc bromide in THF (3.5 mL, 0.63 M, 2.20 mmol, 3.0 equiv), the desired product was obtained after purification by FC [V(SiO<sub>2</sub>) = 25 mL, Cy/EA : 9/1 (150 mL), 8/2 (100 mL)] as a yellow oil (149 mg, 65%).

**R<sub>f</sub> (SiO<sub>2</sub>, Cy/EA : 8/2):** 0.51.

**HRMS (ESI+):** *m/z* [M+H]<sup>+</sup> Calcd. for C<sub>16</sub>H<sub>25</sub>BrN: 310.1165. Found: 310.1163.

**<sup>1</sup>H NMR (400 MHz, CDCl<sub>3</sub>):** δ 7.42 – 7.40 (m, 2H), 7.23 – 7.16 (m, 2H), 3.29 (dd, *J* = 9.4, 4.9 Hz, 1H), 2.36 (br s, 4H), 1.92 – 1.85 (m, 1H), 1.82 – 1.74 (m, 1H), 1.59 – 1.55 (m, 4H), 1.41 – 1.28 (m, 4H), 1.21 – 1.05 (m, 2H), 0.87 (t, *J* = 7.3 Hz, 3H).

**<sup>13</sup>C{<sup>1</sup>H} NMR (100 MHz, CDCl<sub>3</sub>):** δ 143.1 (C), 131.6 (CH), 129.9 (CH), 129.4 (CH), 127.4 (CH), 122.2 (C), 70.2 (CH), 51.2 (2 CH<sub>2</sub>), 35.3 (CH<sub>2</sub>), 28.8 (CH<sub>2</sub>), 26.4 (2 CH<sub>2</sub>), 24.7 (CH<sub>2</sub>), 22.9 (CH<sub>2</sub>), 14.1 (CH<sub>3</sub>).

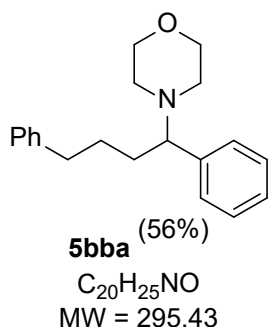

Compound **5bba**: Following the **GP** performed with morpholine (69 μL, 0.79 mmol, 1.0 equiv), benzaldehyde (89 μL, 0.87 mmol, 1.1 equiv) and a solution of alkylzinc bromide in 2-MeTHF (3.5 mL, 0.68 M, 2.38 mmol, 3.0 equiv), the desired product was obtained after purification by FC [V(SiO<sub>2</sub>) = 25 mL, Cy/EA : 9/1 (100 mL), 8/2 (150 mL)] as a colorless oil (132 mg, 56%).

**R<sub>f</sub> (SiO<sub>2</sub>, Cy/EA : 8/2):** 0.31.

**HRMS (ESI+):** *m/z* [M+H]<sup>+</sup> Calcd. for C<sub>20</sub>H<sub>26</sub>NO: 296.2009. Found: 296.2005.

**<sup>1</sup>H NMR (400 MHz, CDCl<sub>3</sub>):** δ 7.44 – 7.40 (m, 2H), 7.37 – 7.24 (m, 6H), 7.20 (d, *J* = 8.0 Hz, 2H), 3.77 (t, *J* = 4.6 Hz, 4H), 3.34 (dd, *J* = 9.2, 4.9 Hz, 1H), 2.66 (dt, *J* = 14.6, 7.3 Hz, 2H), 2.54 – 2.43 (m, 4H), 2.10 – 1.97 (m, 1H), 1.89 – 1.80 (m, 1H), 1.67 – 1.47 (m, 2H).

**<sup>13</sup>C{<sup>1</sup>H} NMR (100 MHz, CDCl<sub>3</sub>):** δ 142.3 (C), 140.4 (C), 128.6 (3 CH), 128.4 (2 CH), 128.3 (CH), 128.1 (2 CH), 127.2 (CH), 125.78 (CH), 70.5 (CH), 67.3 (2 CH<sub>2</sub>), 51.1 (2 CH<sub>2</sub>), 35.9 (CH<sub>2</sub>), 32.0 (CH<sub>2</sub>), 27.9 (CH<sub>2</sub>).

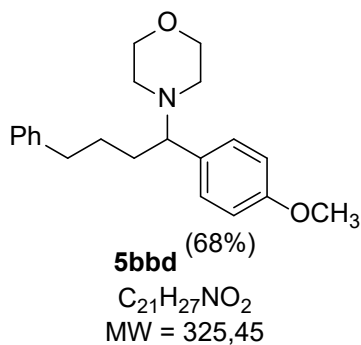

Compound **5bbd**: Following the **GP** performed with morpholine (69  $\mu$ L, 0.79 mmol, 1.0 equiv), *p*-anisaldehyde (106  $\mu$ L, 0.87 mmol, 1.1 equiv) and a solution of alkylzinc bromide in 2-MeTHF (3.5 mL, 0.68 M, 2.38 mmol, 3.0 equiv), the desired product was obtained after purification by FC [ $V(SiO_2)$  = 25 mL, Cy/EA : 8/2 (100 mL), 6/4 (150 mL)] as a pale yellow oil (175 mg, 68%).

$R_f$  ( $SiO_2$ , Cy/EA : 8/2): 0.15.

**HRMS (ESI+)**:  $m/z$  [ $M+H$ ]<sup>+</sup> Calcd. for  $C_{21}H_{28}NO_2$ : 326.2115. Found: 326.2117.

**$^1H$  NMR (400 MHz,  $CDCl_3$ )**:  $\delta$  7.40 – 7.25 (m, 4H), 7.24 – 7.19 (m, 3H), 6.96 (d,  $J$  = 8.6 Hz, 2H), 3.88 (s, 3H), 3.77 – 3.71 (m, 4H), 3.29 (dd,  $J$  = 9.4, 4.7 Hz, 1H), 2.82 – 2.78 (m, 1H), 2.62 – 2.60 (m, 2H), 2.52 – 2.41 (m, 3H), 2.08 – 1.94 (m, 2H), 1.87 – 1.77 (m, 1H), 1.65 – 1.46 (m, 1H).

**$^{13}C\{^1H\}$  NMR (100 MHz,  $CDCl_3$ )**:  $\delta$  158.6 (C), 146.3 (C), 132.2 (C), 129.5 (2 CH), 128.3 (2 CH), 128.2 (2 CH), 125.6 (CH), 113.4 (2 CH), 69.7 (CH), 67.1 (2  $CH_2$ ), 55.1 ( $CH_3$ ), 51.0 (2  $CH_2$ ), 35.8 ( $CH_2$ ), 31.9 ( $CH_2$ ), 18.0 ( $CH_2$ ).

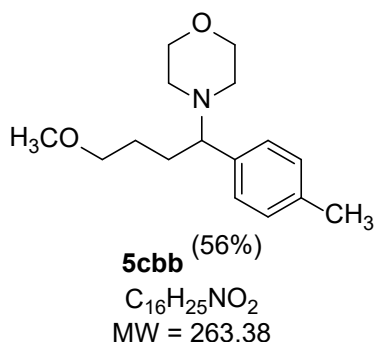

Compound **5cbb**: Following the **GP** performed with morpholine (78  $\mu$ L, 0.89 mmol, 1.0 equiv), *p*-tolualdehyde (115  $\mu$ L, 0.97 mmol, 1.1 equiv) and a solution of alkylzinc bromide in THF (3.5 mL, 0.76 M, 2.66 mmol, 3.0 equiv), the desired product was obtained after purification by FC [ $V(SiO_2)$  = 25 mL, Cy/EA : 8/2 (100 mL), 6/4 (150 mL)] as a pale yellow oil (132 mg, 56%).

$R_f$  ( $SiO_2$ , Cy/EA : 6/4): 0.24.

**HRMS (ESI+)**:  $m/z$  [ $M+H$ ]<sup>+</sup> Calcd. for  $C_{16}H_{26}NO_2$ : 264.1958. Found: 264.1957.

**$^1H$  NMR (400 MHz,  $CDCl_3$ )**:  $\delta$  7.15 (br s, 4H), 3.70 (t,  $J$  = 4.5 Hz, 4H), 3.33 (t,  $J$  = 6.5 Hz, 2H), 3.30 (s, 3H), 3.24 (dd,  $J$  = 9.2, 4.9 Hz, 1H), 2.50 – 2.40 (m, 4H), 2.36 (s, 3H), 2.07 – 1.96 (m, 1H), 1.81 – 1.71 (m, 1H), 1.52 – 1.34 (m, 2H).

**$^{13}C\{^1H\}$  NMR (100 MHz,  $CDCl_3$ )**:  $\delta$  137.1 (C), 136.6 (C), 128.8 (2 CH), 128.5 (2 CH), 77.7 ( $CH_2$ ), 70.0 (CH), 67.2 (2  $CH_2$ ), 58.4 ( $CH_3$ ), 51.0 (2  $CH_2$ ), 29.0 ( $CH_2$ ), 26.4 ( $CH_2$ ), 21.0 ( $CH_3$ ).

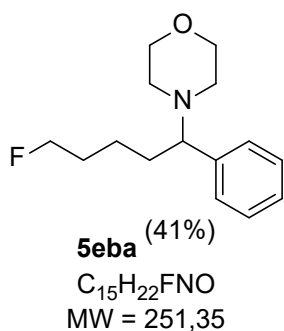

Compound **5eba**: Following the **GP** performed with morpholine (62  $\mu$ L, 0.71 mmol, 1.0 equiv), benzaldehyde (80  $\mu$ L, 0.78 mmol, 1.1 equiv) and a solution of alkylzinc bromide in 2-MeTHF (3.5 mL, 0.61 M, 2.13 mmol, 3.0 equiv), the desired product was obtained after purification by FC [ $V(SiO_2)$  = 25 mL, Cy/EA : 8/2 (150 mL), 6/4 (100 mL)] as a pale yellow oil (74 mg, 41%).

$R_f$  ( $SiO_2$ , Cy/EA : 8/2): 0.20.

**HRMS (ESI+)**:  $m/z$  [ $M+H$ ]<sup>+</sup> Calcd. for  $C_{15}H_{23}FNO$ : 252.1758. Found: 252.1761.

**$^1H$  NMR (400 MHz,  $CDCl_3$ )**:  $\delta$  7.39 – 7.35 (m, 2H), 7.32 – 7.27 (m, 3H), 4.46 (t,  $J$  = 6.2 Hz, 1H), 4.35 (t,  $J$  = 6.2 Hz, 1H), 3.73 (t,  $J$  = 4.7 Hz, 4H), 3.29 (dd,  $J$  = 9.2, 4.7 Hz, 1H), 2.52 – 2.40 (m, 4H), 2.04 – 1.96 (m, 1H), 1.85 – 1.63 (m, 3H), 1.38 – 1.17 (m, 2H).

**$^{13}C\{^1H\}$  NMR (100 MHz,  $CDCl_3$ )**:  $\delta$  140.2 (C), 128.7 (2 CH), 128.2 (2 CH), 127.3 (CH), 84.0 (d,  $^1J_{C-F}$  = 164.2 Hz,  $CH_2$ ), 70.5 (CH), 67.2 (2  $CH_2$ ), 51.1 (2  $CH_2$ ), 32.1 ( $CH_2$ ), 30.5 (d,  $^2J_{C-F}$  = 18.6 Hz,  $CH_2$ ), 22.0 (d,  $^3J_{C-F}$  = 4.8 Hz,  $CH_2$ ).

**$^{19}F\{^1H\}$  NMR (376 MHz,  $CDCl_3$ )**:  $\delta$  -112.1 (F).



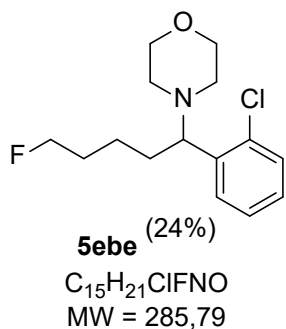

Compound **5ebe**: Following the **GP** performed with morpholine (62  $\mu$ L, 0.71 mmol, 1.0 equiv), 2-chlorobenzaldehyde (88  $\mu$ L, 0.78 mmol, 1.1 equiv) and a solution of alkylzinc bromide in 2-MeTHF (3.5 mL, 0.61 M, 2.13 mmol, 3.0 equiv), the desired product was obtained after purification by FC [ $V(SiO_2) = 25$  mL, Cy/EA : 8/2 (150 mL), 6/4 (100 mL)] as a colorless oil (48 mg, 24%).

$R_f$  ( $SiO_2$ , Cy/EA : 8/2): 0.15.

**HRMS (ESI+)**:  $m/z$  [ $M+H$ ]<sup>+</sup> Calcd. for  $C_{15}H_{22}ClFNO$ : 286.1368. Found: 286.1369.

**$^1H$  NMR (400 MHz,  $CDCl_3$ )**:  $\delta$  7.43 (dd,  $J = 7.9, 1.8$  Hz, 1H), 7.35 (dd,  $J = 7.9, 1.4$  Hz, 1H), 7.25 (td,  $J = 7.6, 1.4$  Hz, 1H), 7.16 (td,  $J = 7.6, 1.8$  Hz, 1H), 4.41 (t,  $J = 6.1$  Hz, 1H), 4.30 (t,  $J = 6.1$  Hz, 1H), 3.95 (dd,  $J = 8.9, 4.6$  Hz, 1H), 3.66 (t,  $J = 4.6$  Hz, 4H), 2.55 – 2.52 (m, 2H), 2.37 (dt,  $J = 11.0, 4.7$  Hz, 2H), 1.97 – 1.88 (m, 1H), 1.76 – 1.56 (m, 3H), 1.33 – 1.14 (m, 2H).

**$^{13}C\{^1H\}$  NMR (100 MHz,  $CDCl_3$ )**:  $\delta$  138.6 (C), 135.0 (C), 129.6 (CH), 129.2 (CH), 128.1 (CH), 126.8 (CH), 84.0 (d,  $^1J_{C-F} = 164.3$  Hz,  $CH_2$ ), 67.3 (2  $CH_2$ ), 64.5 (CH), 51.1 (2  $CH_2$ ), 31.8 ( $CH_2$ ), 30.6 (d,  $^2J_{C-F} = 19.8$  Hz,  $CH_2$ ), 21.1 (d,  $^3J_{C-F} = 4.8$  Hz,  $CH_2$ ).

**$^{19}F\{^1H\}$  NMR (376 MHz,  $CDCl_3$ )**:  $\delta$  -112.1 (F).

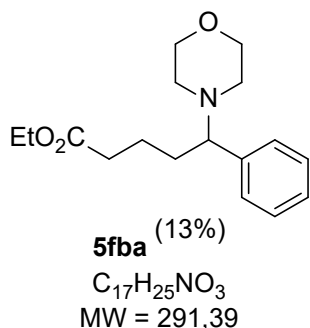

Compound **5fba**:<sup>2</sup> Following the **GP** performed with morpholine (76  $\mu$ L, 0.86 mmol, 1.0 equiv), benzaldehyde (97  $\mu$ L, 0.95 mmol, 1.1 equiv) and a solution of alkylzinc bromide in 2-MeTHF (7.0 mL, 0.37 M, 2.59 mmol, 3.0 equiv), the desired product was obtained after purification by FC [ $V(SiO_2) = 25$  mL, Cy/EA : 8/2 (100 mL), 6/4 (150 mL)] as a pale yellow oil (33 mg, 13%).

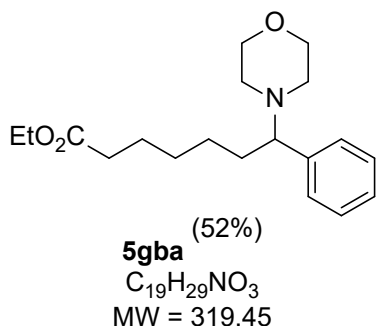

Compound **5gba**: Following the **GP** performed with morpholine (67  $\mu$ L, 0.77 mmol, 1.0 equiv), benzaldehyde (86  $\mu$ L, 0.85 mmol, 1.1 equiv) and a solution of alkylzinc bromide in 2-MeTHF (3.5 mL, 0.66 M, 2.31 mmol, 3.0 equiv), the desired product was obtained after purification by FC [ $V(SiO_2) = 25$  mL, Cy/EA : 8/2 (100 mL), 6/4 (150 mL)] as a pale yellow oil (128 mg, 52%).

$R_f$  ( $SiO_2$ , Cy/EA : 6/4): 0.40.

**HRMS (ESI+)**:  $m/z$  [ $M+H$ ]<sup>+</sup> Calcd. for  $C_{19}H_{30}NO_3$ : 320.2220. Found: 320.2223.

**$^1H$  NMR (400 MHz,  $CDCl_3$ )**:  $\delta$  7.36 – 7.32 (m, 2H), 7.30 – 7.24 (m, 3H), 4.12 (q,  $J = 7.1$  Hz, 2H), 3.71 (t,  $J = 4.6$  Hz, 4H), 3.26 (dd,  $J = 9.5, 4.6$  Hz, 1H), 2.51 – 2.38 (m, 4H), 2.24 (t,  $J = 7.5$  Hz, 2H), 1.98 – 1.89 (m, 1H), 1.79 – 1.67 (m, 1H), 1.61 – 1.53 (m, 2H), 1.44 – 1.08 (m, 7H).

**$^{13}C\{^1H\}$  NMR (100 MHz,  $CDCl_3$ )**:  $\delta$  173.8 (C), 140.2 (C), 128.7 (2 CH), 128.2 (2 CH), 127.2 (CH), 70.6 (CH), 67.1 (2  $CH_2$ ), 60.2 ( $CH_2$ ), 51.1 (2  $CH_2$ ), 34.3 ( $CH_2$ ), 32.1 ( $CH_2$ ), 29.2 ( $CH_2$ ), 25.9 ( $CH_2$ ), 24.8 ( $CH_2$ ), 14.3 ( $CH_3$ ).

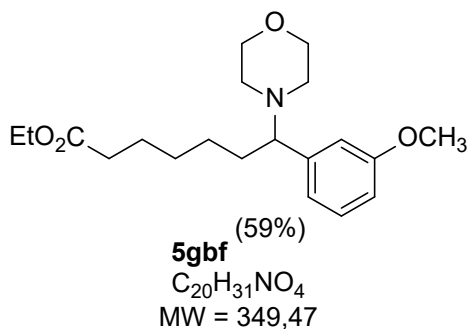

Compound **5gbf**: Following the **GP** performed with morpholine (67  $\mu$ L, 0.77 mmol, 1.0 equiv), 3-anisaldehyde (103  $\mu$ L, 0.85 mmol, 1.1 equiv) and a solution of alkylzinc bromide in 2-MeTHF (3.5 mL, 0.66 M, 2.31 mmol, 3.0 equiv), the desired product was obtained after purification by FC [V(SiO<sub>2</sub>) = 25 mL, Cy/EA : 8/2 (150 mL), 6/4 (100 mL)] as a pale yellow oil (158 mg, 59%).

**R<sub>f</sub>** (SiO<sub>2</sub>, Cy/EA : 6/4): 0.32.

**HRMS (ESI+)**: m/z [M+H]<sup>+</sup> Calcd. for C<sub>20</sub>H<sub>32</sub>NO<sub>4</sub>: 350.2326. Found: 350.2328.

**<sup>1</sup>H NMR (400 MHz, CDCl<sub>3</sub>)**:  $\delta$  7.20 – 7.16 (m, 1H), 6.78 – 6.75 (m, 3H), 4.06 (q, *J* = 7.1 Hz, 2H), 3.77 (s, 3H), 3.63 (t, *J* = 4.5 Hz, 4H), 3.13 (dd, *J* = 9.4, 4.6 Hz, 1H), 2.46 – 2.31 (m, 4H), 2.18 (t, *J* = 7.5 Hz, 2H), 1.88 – 1.80 (m, 1H), 1.68 – 1.60 (m, 1H), 1.54 – 1.47 (m, 2H), 1.38 – 1.02 (m, 7H).

**<sup>13</sup>C{<sup>1</sup>H} NMR (100 MHz, CDCl<sub>3</sub>)**:  $\delta$  173.7 (C), 159.5 (C), 142.2 (C), 129.0 (CH), 121.1 (CH), 114.4 (CH), 112.1 (CH), 70.6 (CH), 67.2 (2 CH<sub>2</sub>), 60.2 (CH<sub>2</sub>), 55.2 (CH<sub>3</sub>), 51.2 (2 CH<sub>2</sub>), 34.3 (CH<sub>2</sub>), 32.2 (CH<sub>2</sub>), 29.2 (CH<sub>2</sub>), 25.9 (CH<sub>2</sub>), 24.8 (CH<sub>2</sub>), 14.3 (CH<sub>3</sub>).

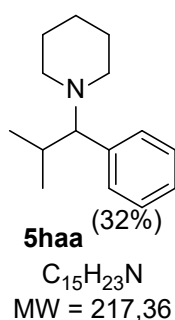

Compound **5haa**:<sup>1</sup> Following the **GP** performed with piperidine (48  $\mu$ L, 0.48 mmol, 1.0 equiv), benzaldehyde (54  $\mu$ L, 0.53 mmol, 1.1 equiv) and a solution of alkylzinc bromide in THF (2.5 mL, 0.58 M, 1.45 mmol, 3.0 equiv), the desired product was obtained after purification by FC [V(SiO<sub>2</sub>) = 25 mL, Cy/EA : 9.5/0.5 (150 mL), 9/1 (100 mL)] as a pale yellow oil (33 mg, 32%).

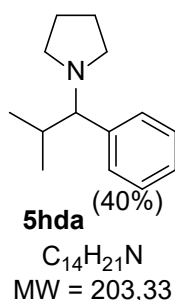

Compound **5hda**:<sup>1</sup> Following the **GP** performed with pyrrolidine (51  $\mu$ L, 0.61 mmol, 1.0 equiv), benzaldehyde (68  $\mu$ L, 0.67 mmol, 1.1 equiv) and a solution of alkylzinc bromide in THF (3.5 mL, 0.52 M, 1.82 mmol, 3.0 equiv), the desired product was obtained after purification by FC [V(SiO<sub>2</sub>) = 25 mL, Cy/EA : 9.5/0.5 (100 mL), 9/1 (150 mL)] as a colorless oil (50 mg, 40%).

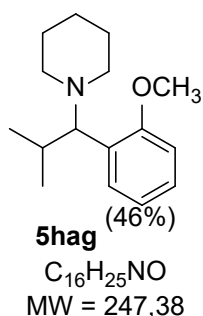

Compound **5hag**:<sup>1</sup> Following the **GP** performed with piperidine (48  $\mu$ L, 0.48 mmol, 1.0 equiv), 2-anisaldehyde (64  $\mu$ L, 0.53 mmol, 1.1 equiv) and a solution of alkylzinc bromide in THF (2.5 mL, 0.58 M, 1.45 mmol, 3.0 equiv), the desired product was obtained after purification by FC [V(SiO<sub>2</sub>) = 25 mL, Cy/EA : 9.5/0.5 (100 mL), 9/1 (150 mL)] as a colorless oil (57 mg, 46%).

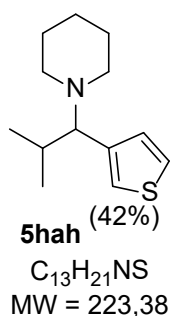

Compound **5hah**:<sup>1</sup> Following the **GP** performed with piperidine (48  $\mu$ L, 0.48 mmol, 1.0 equiv), 3-thiophenecarboxaldehyde (47  $\mu$ L, 0.53 mmol, 1.1 equiv) and a solution of alkylzinc bromide in THF (2.5 mL, 0.58 M, 1.45 mmol, 3.0 equiv), the desired product was obtained after purification by FC [V(SiO<sub>2</sub>) = 25 mL, Cy/EA : 9.5/0.5 (150 mL), 9/1 (100 mL)] as a colorless oil (55 mg, 42%).

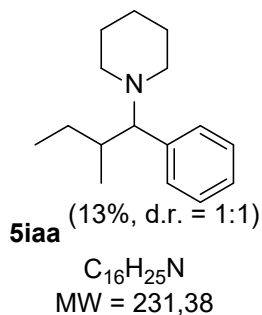

Compound **5iaa**:<sup>1</sup> Following the **GP** performed with piperidine (46  $\mu$ L, 0.46 mmol, 1.0 equiv), benzaldehyde (52  $\mu$ L, 0.51 mmol, 1.1 equiv) and a solution of alkylzinc bromide in THF (2.0 mL, 0.69 M, 1.38 mmol, 3.0 equiv), the desired product was obtained after purification by FC [ $V(SiO_2)$  = 25 mL, Cy/EA : 9.5/0.5 (150 mL), 9/1 (100 mL)] as a colorless oil (14 mg, 13%, d.r. = 1:1).

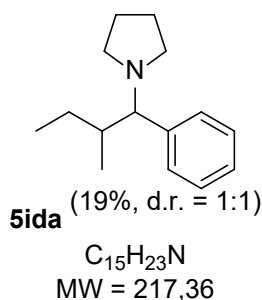

Compound **5ida**: Following the **GP** performed with pyrrolidine (39  $\mu$ L, 0.46 mmol, 1.0 equiv), benzaldehyde (52  $\mu$ L, 0.51 mmol, 1.1 equiv) and a solution of alkylzinc bromide in THF (2.0 mL, 0.69 M, 1.38 mmol, 3.0 equiv), the desired product was obtained after purification by FC [ $V(SiO_2)$  = 25 mL, Cy/EA : 9.5/0.5 (150 mL), 9/1 (100 mL)] as a colorless oil (19 mg, 19%, d.r. = 1:1).

$R_f$  ( $SiO_2$ , Cy/EA : 9/1): 0.13.

**HRMS (ESI+)**: m/z [ $M+H$ ]<sup>+</sup> Calcd. for  $C_{15}H_{24}N$ : 218.1903. Found: 218.1904.

**$^1H$  NMR (400 MHz,  $CDCl_3$ )**:  $\delta$  7.34 – 7.28 (m, 10H), 3.20 (d,  $J$  = 4.8 Hz, 1H), 3.14 (d,  $J$  = 5.4 Hz, 1H), 2.56 – 2.48 (m, 8H), 2.03 – 1.85 (m, 4H), 1.82 – 1.76 (m, 8H), 1.43 – 1.31 (m, 2H), 0.97 – 0.84 (m, 12H).

**$^{13}C\{^1H\}$  NMR (100 MHz,  $CDCl_3$ )**:  $\delta$  139.9 (2 C), 129.5 (2 CH), 129.5 (2 CH), 127.5 (4 CH), 126.8 (CH), 126.8 (CH), 75.7 (CH), 74.8 (CH), 52.6 (2  $CH_2$ ), 52.1 (2  $CH_2$ ), 37.8 (2 CH), 27.6 ( $CH_2$ ), 23.3 (2  $CH_2$ ), 23.3 (2  $CH_2$ ), 23.2 ( $CH_2$ ), 17.1 ( $CH_3$ ), 13.5 ( $CH_3$ ), 12.3 ( $CH_3$ ), 12.1 ( $CH_3$ ).

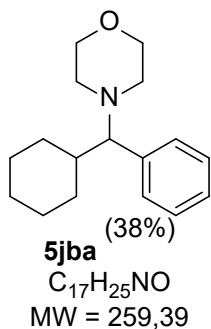

Compound **5jba**: Following the **GP** performed with morpholine (57  $\mu$ L, 0.65 mmol, 1.0 equiv), benzaldehyde (73  $\mu$ L, 0.72 mmol, 1.1 equiv) and a solution of alkylzinc bromide in 2-MeTHF (3.5 mL, 0.56 M, 1.96 mmol, 3.0 equiv), the desired product was obtained after purification by FC [ $V(SiO_2)$  = 25 mL, Cy/EA : 9/0 (150 mL), 8/2 (100 mL)] as a pale yellow oil (65 mg, 38%).

$R_f$  ( $SiO_2$ , Cy/EA : 8/2): 0.64.

**HRMS (ESI+)**: m/z [ $M+H$ ]<sup>+</sup> Calcd. for  $C_{17}H_{26}NO$ : 260.2009. Found: 260.2011.

**$^1H$  NMR (400 MHz,  $CDCl_3$ )**:  $\delta$  7.38 – 7.30 (m, 3H), 7.20 (d,  $J$  = 6.8 Hz, 2H), 3.73 (t,  $J$  = 5.7 Hz, 4H), 3.14 (d,  $J$  = 8.1 Hz, 1H), 2.45 – 2.37 (m, 4H), 2.03 – 1.93 (m, 2H), 1.70 (td,  $J$  = 44.7, 42.2, 13.3 Hz, 4H), 1.37 – 1.11 (m, 3H), 0.87 (dq,  $J$  = 25.6, 12.8 Hz, 2H).

**$^{13}C\{^1H\}$  NMR (100 MHz,  $CDCl_3$ )**:  $\delta$  137.9 (C), 129.4 (2 CH), 127.7 (2 CH), 126.9 (CH), 75.6 (CH), 67.5 (2  $CH_2$ ), 50.6 (2  $CH_2$ ), 37.7 (CH), 31.3 ( $CH_2$ ), 29.1 ( $CH_2$ ), 26.9 ( $CH_2$ ), 26.6 ( $CH_2$ ), 26.4 ( $CH_2$ ).

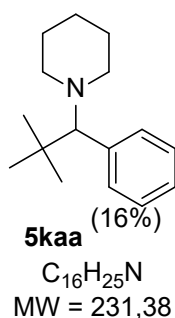

Compound **5kaa**:<sup>1</sup> Following the **GP** performed with piperidine (32  $\mu$ L, 0.33 mmol, 1.0 equiv), benzaldehyde (37  $\mu$ L, 0.36 mmol, 1.1 equiv) and a solution of alkylzinc bromide in THF (7.0 mL, 0.14 M, 0.98 mmol, 3.0 equiv), the desired product was obtained after purification by FC [ $V(SiO_2)$  = 25 mL, Cy/EA : 9.5/0.5 (100 mL), 9/1 (150 mL)] as a pale yellow oil (12 mg, 16%).

## 6. Copies of NMR spectra

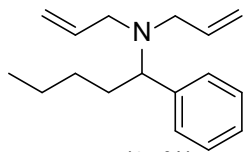

**5aca** (35%)

<sup>1</sup>H NMR (400 MHz / CDCl<sub>3</sub>)

7.41  
7.39  
7.37  
7.33  
7.32  
7.31  
7.29

5.95  
5.91  
5.90  
5.85

5.25  
5.20  
5.17

3.80  
3.78  
3.78  
3.76  
3.38  
3.36  
3.34  
3.33  
2.88  
2.86  
2.84  
2.82

2.01  
1.99  
1.97  
1.93  
1.86  
1.83  
1.80  
1.78  
1.40  
1.36  
1.35  
1.30  
1.24  
1.22  
1.16  
0.95  
0.93  
0.91

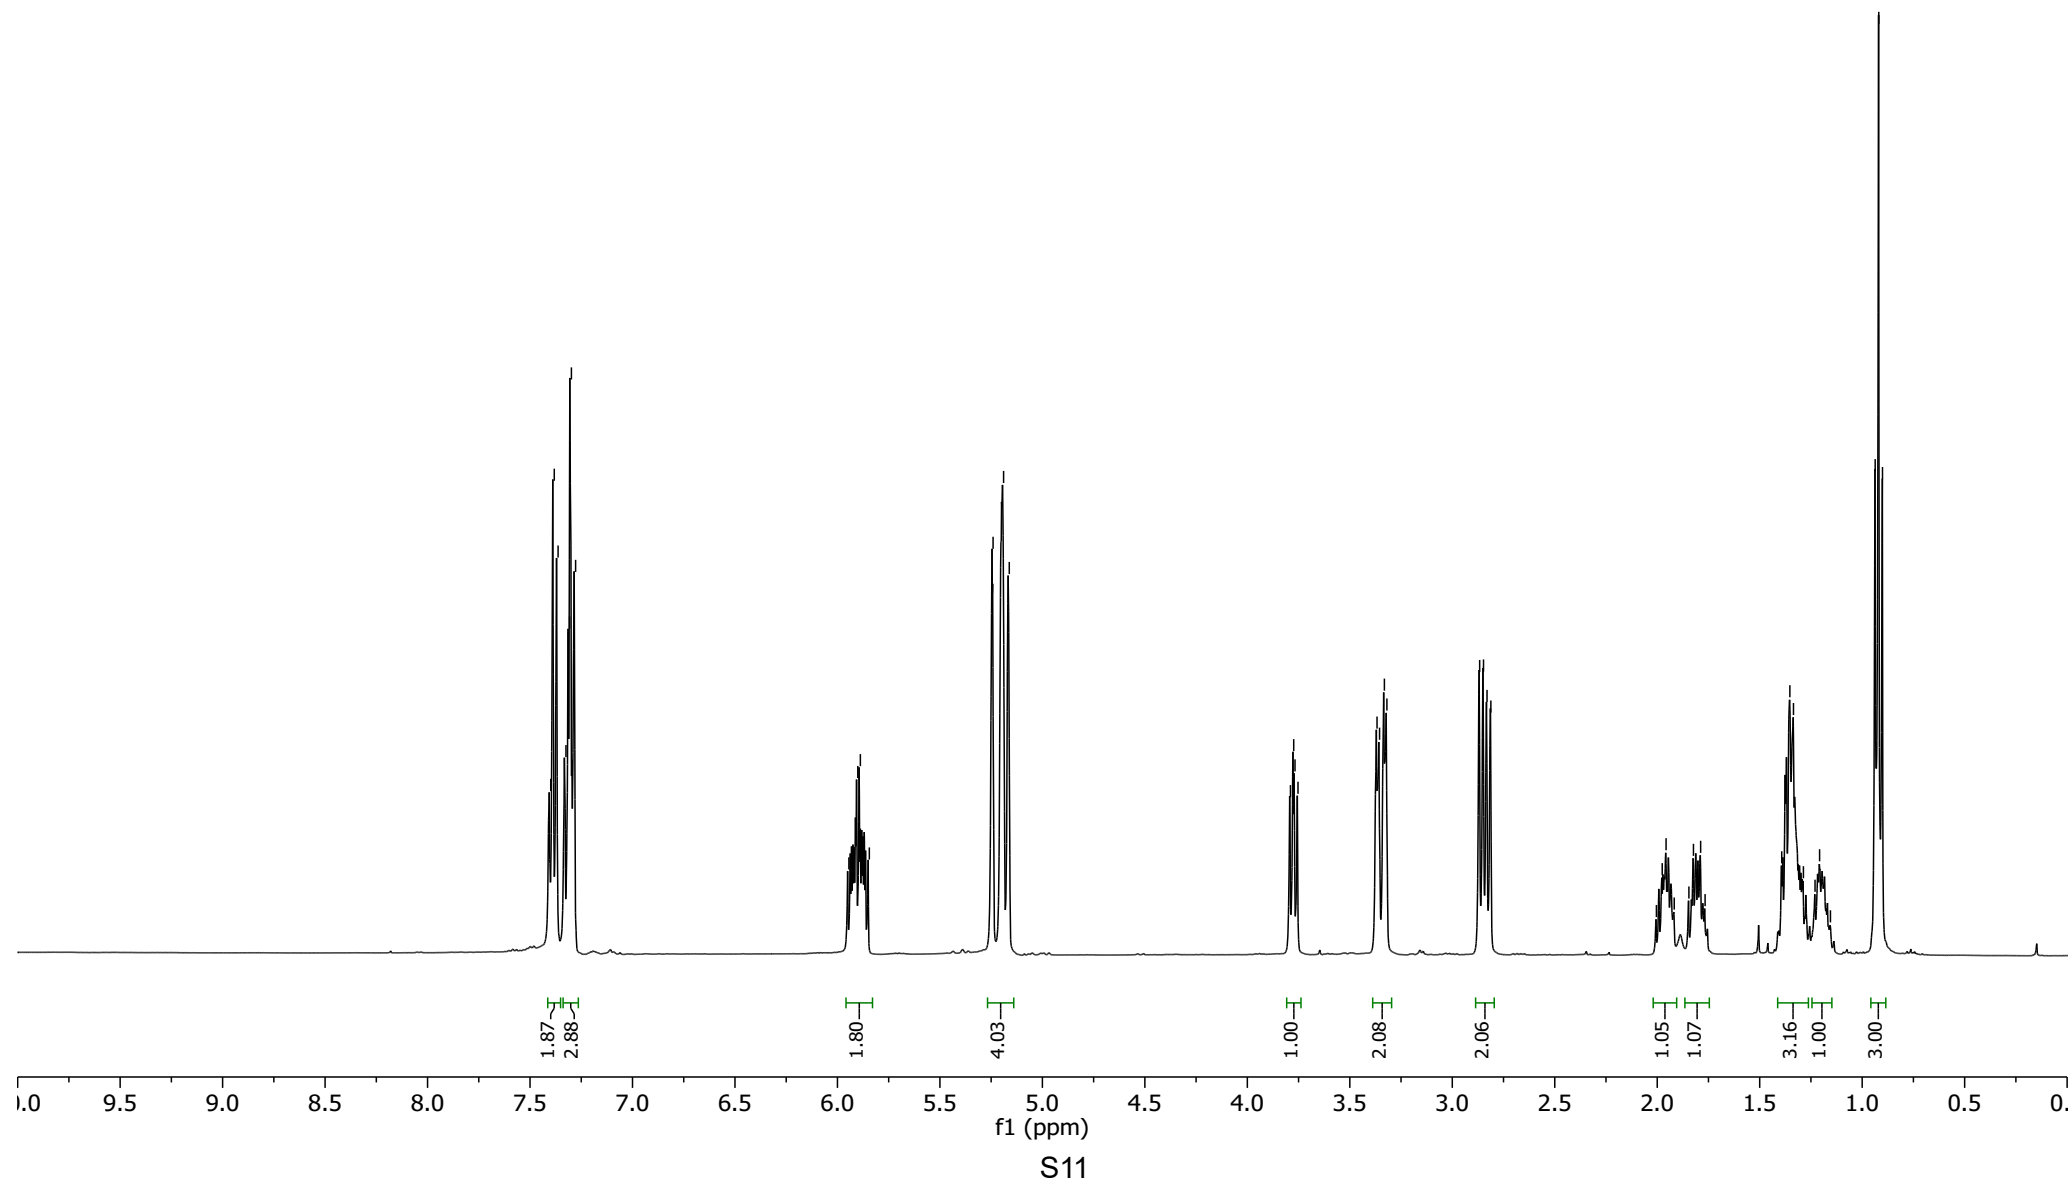

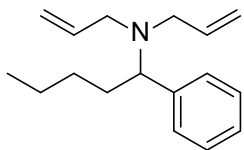

**5aca** (35%)

$^{13}\text{C}\{^1\text{H}\}$  NMR (100 MHz /  $\text{CDCl}_3$ )

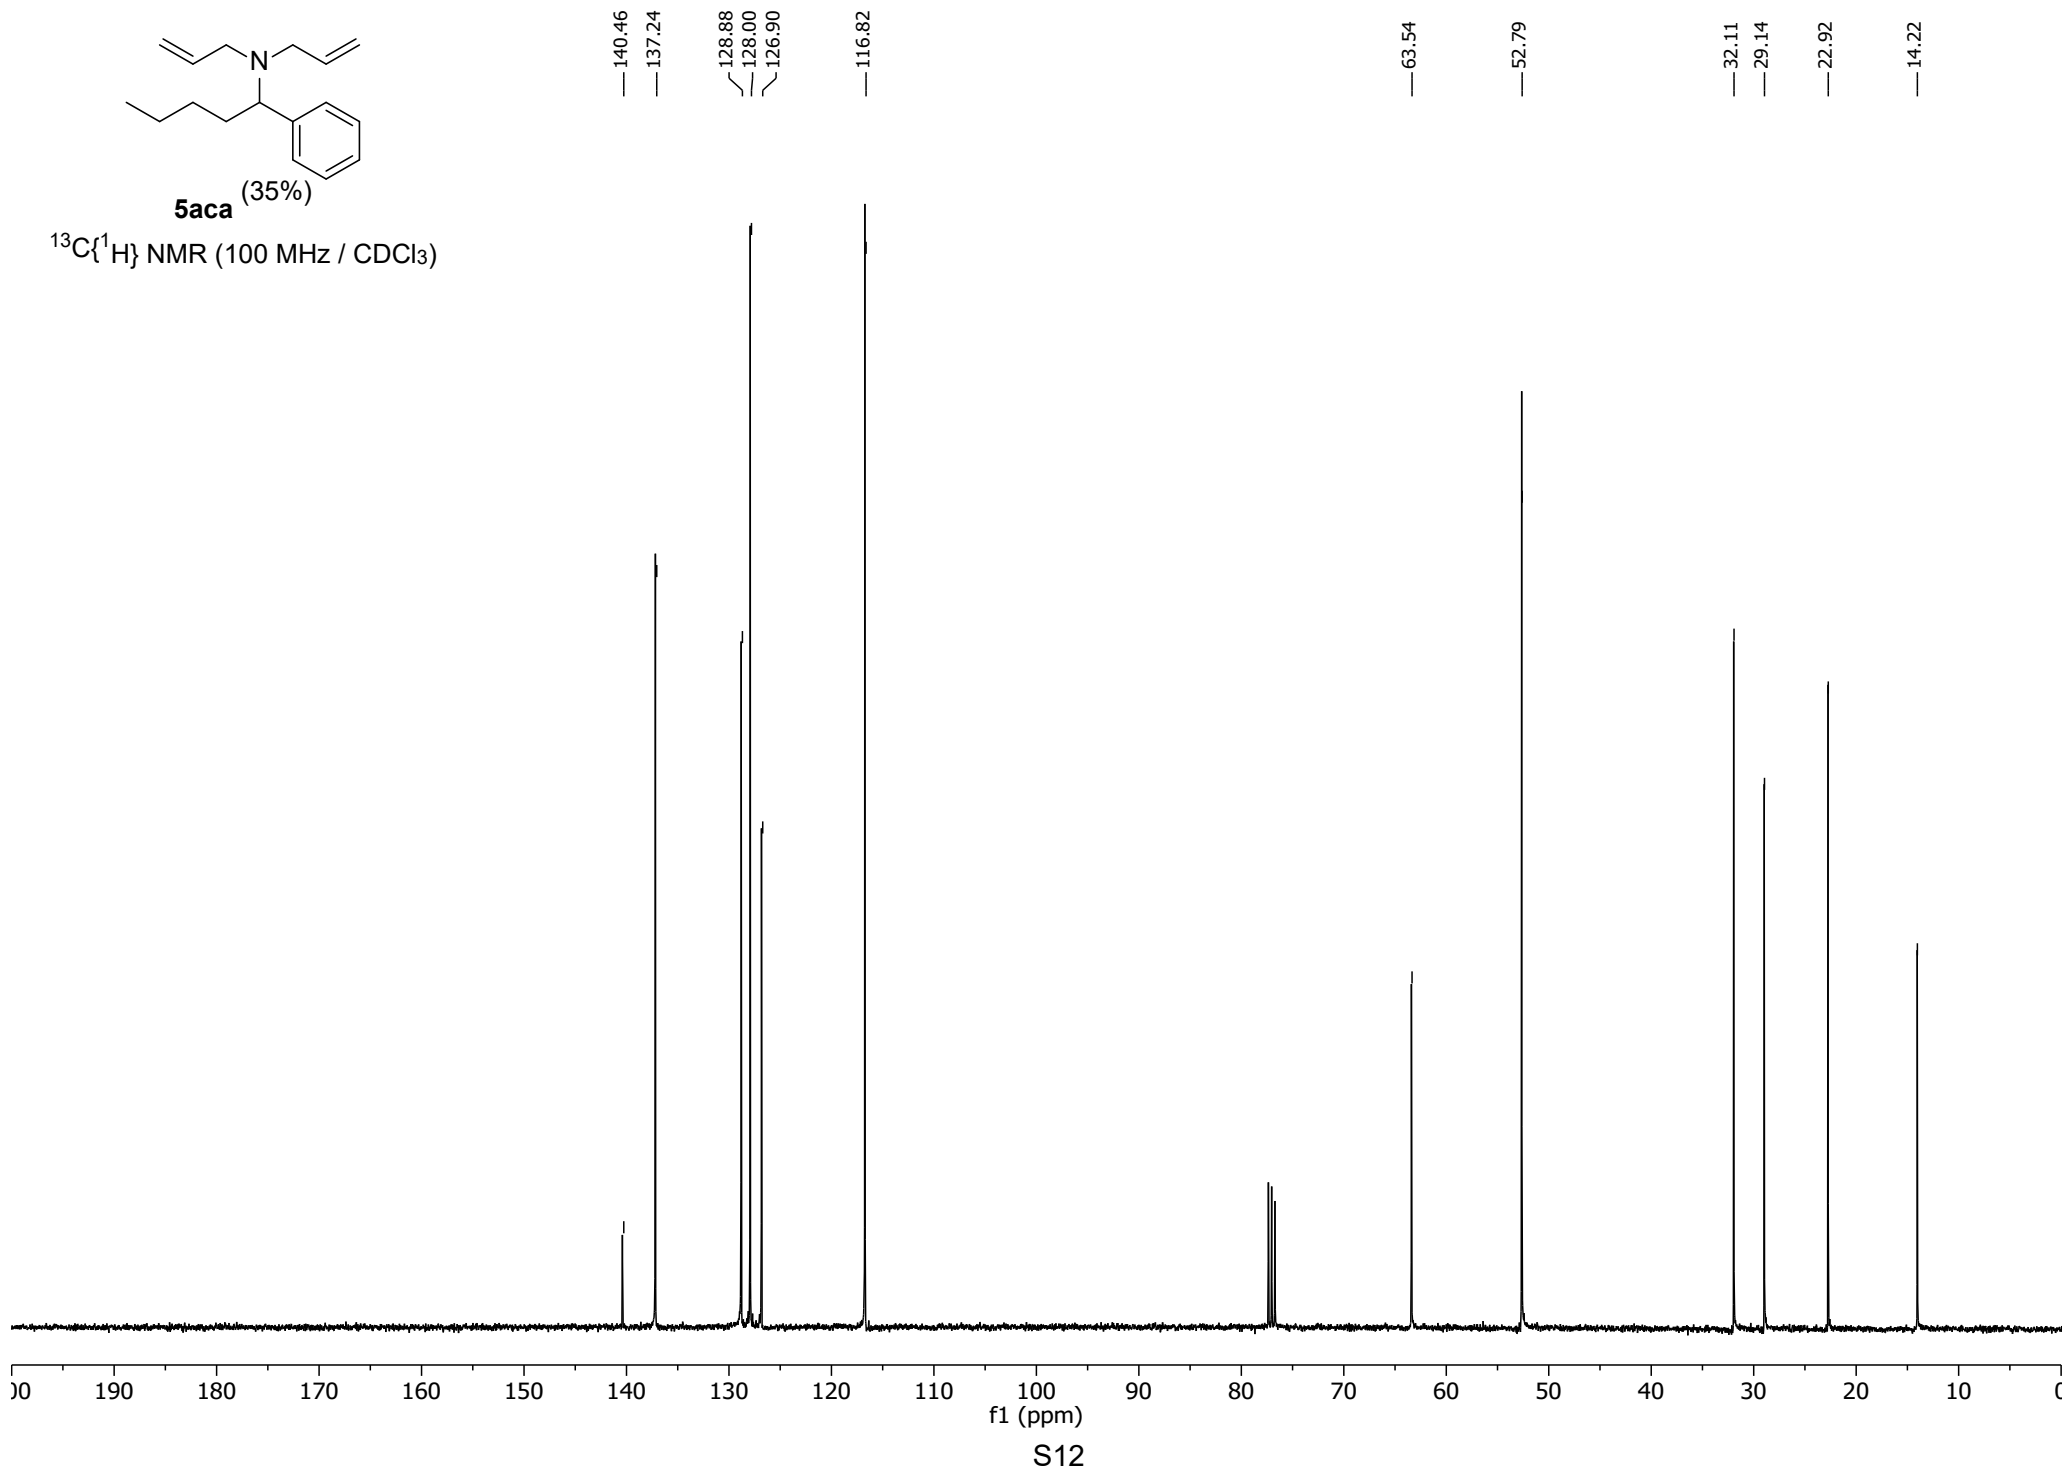

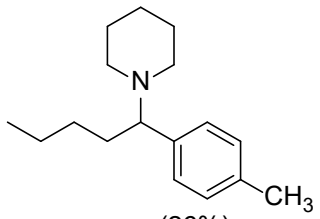

**5aab**

(26%)

<sup>1</sup>H NMR (400 MHz / CDCl<sub>3</sub>)

7.14  
7.12  
7.10  
7.08

3.30  
3.29  
3.28  
3.27  
2.35  
1.91  
1.85  
1.83  
1.82  
1.75  
1.60  
1.57  
1.54  
1.51  
1.48  
1.35  
1.29  
1.24  
1.22  
1.19  
1.15  
1.11  
1.10  
1.06  
1.04  
1.00  
0.85  
0.83  
0.81

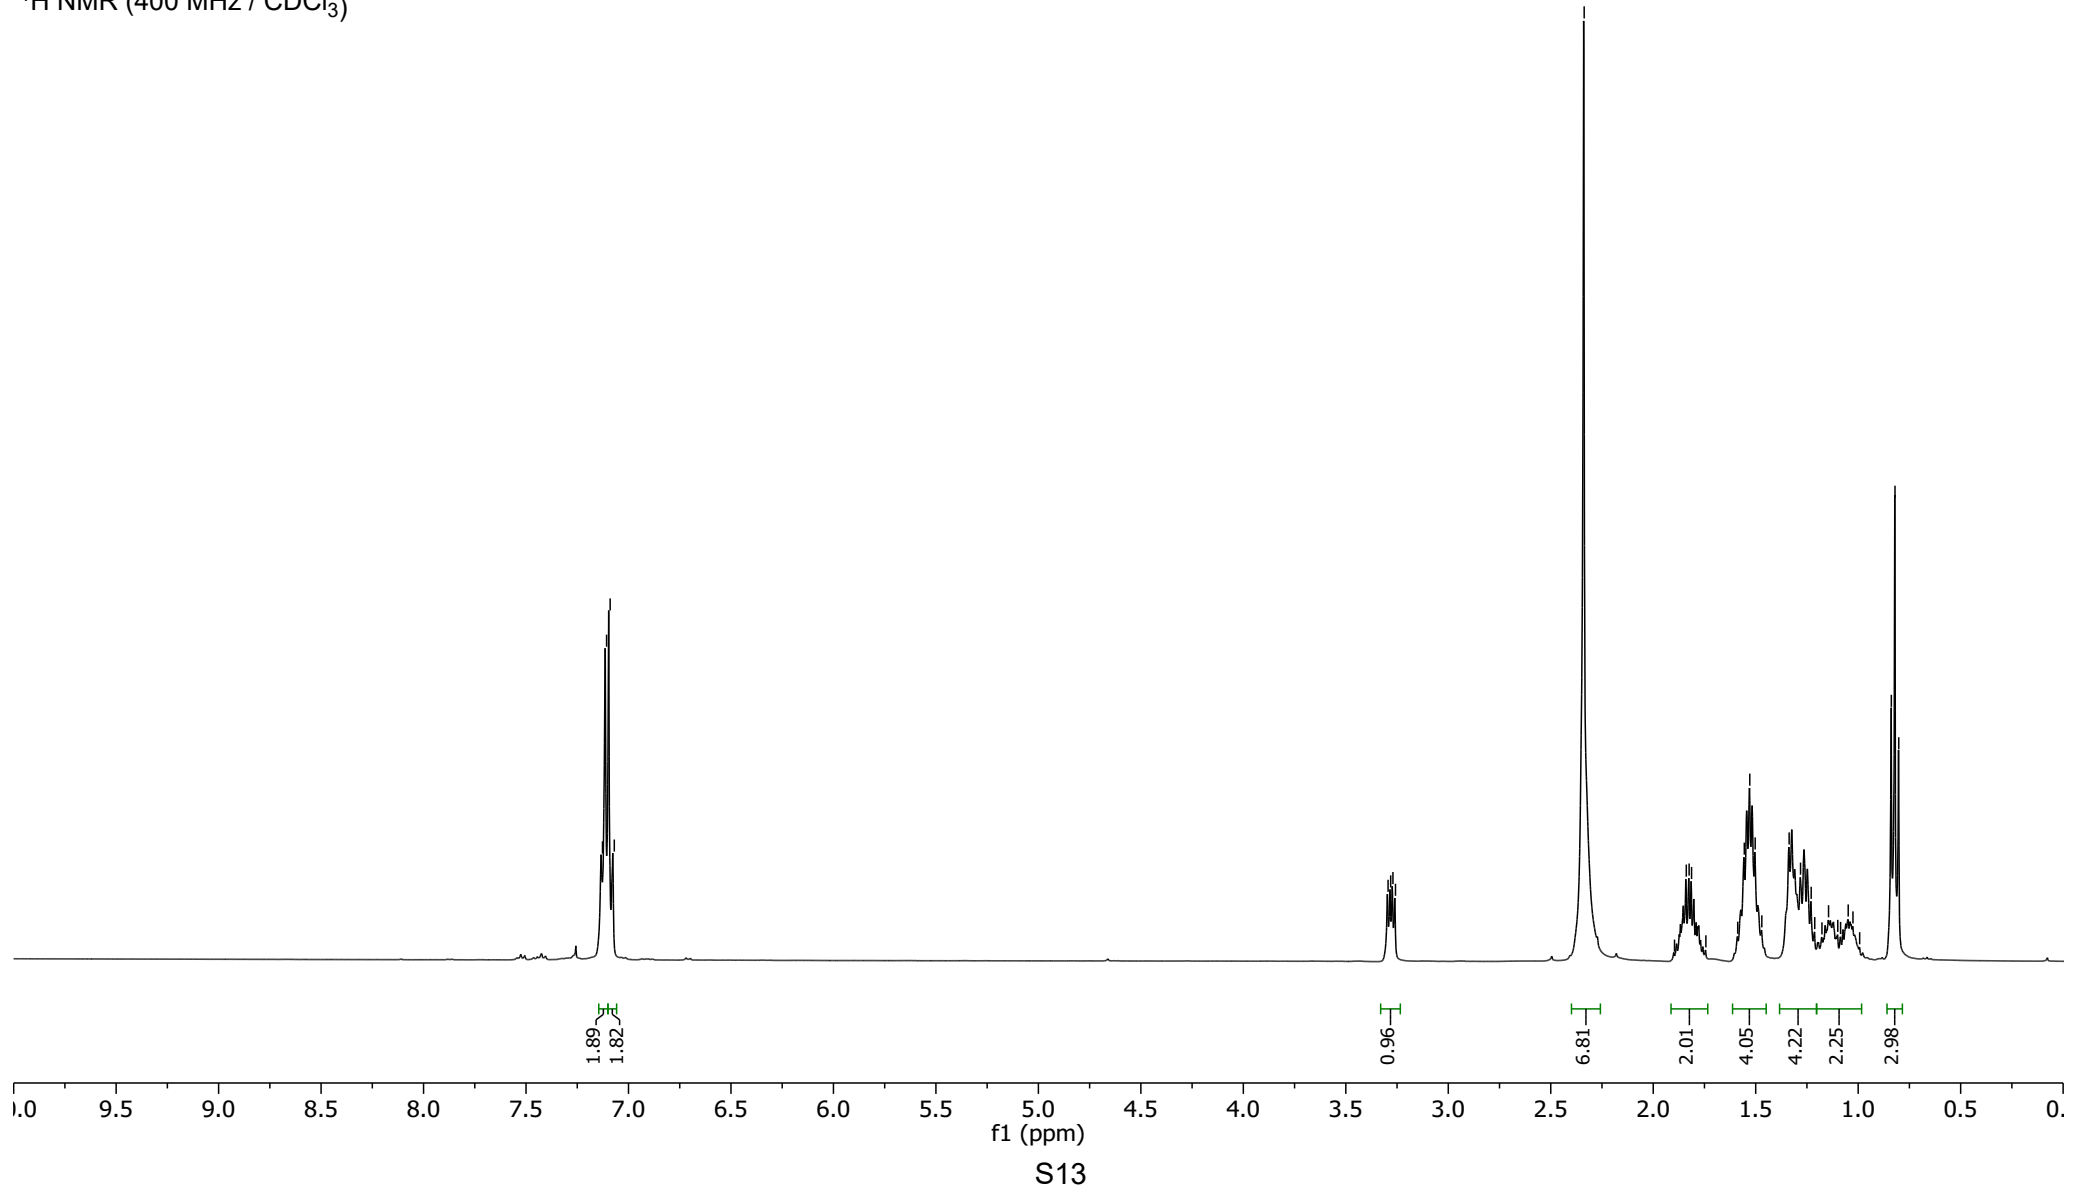

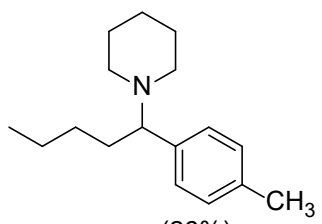

**5aab** (26%)

$^{13}\text{C}\{^1\text{H}\}$  NMR (100 MHz /  $\text{CDCl}_3$ )

- 137.01
- 136.33
- 128.87
- 128.57
- 70.39
- 51.27
- 32.59
- 29.11
- 26.49
- 24.80
- 22.98
- 21.21
- 14.17

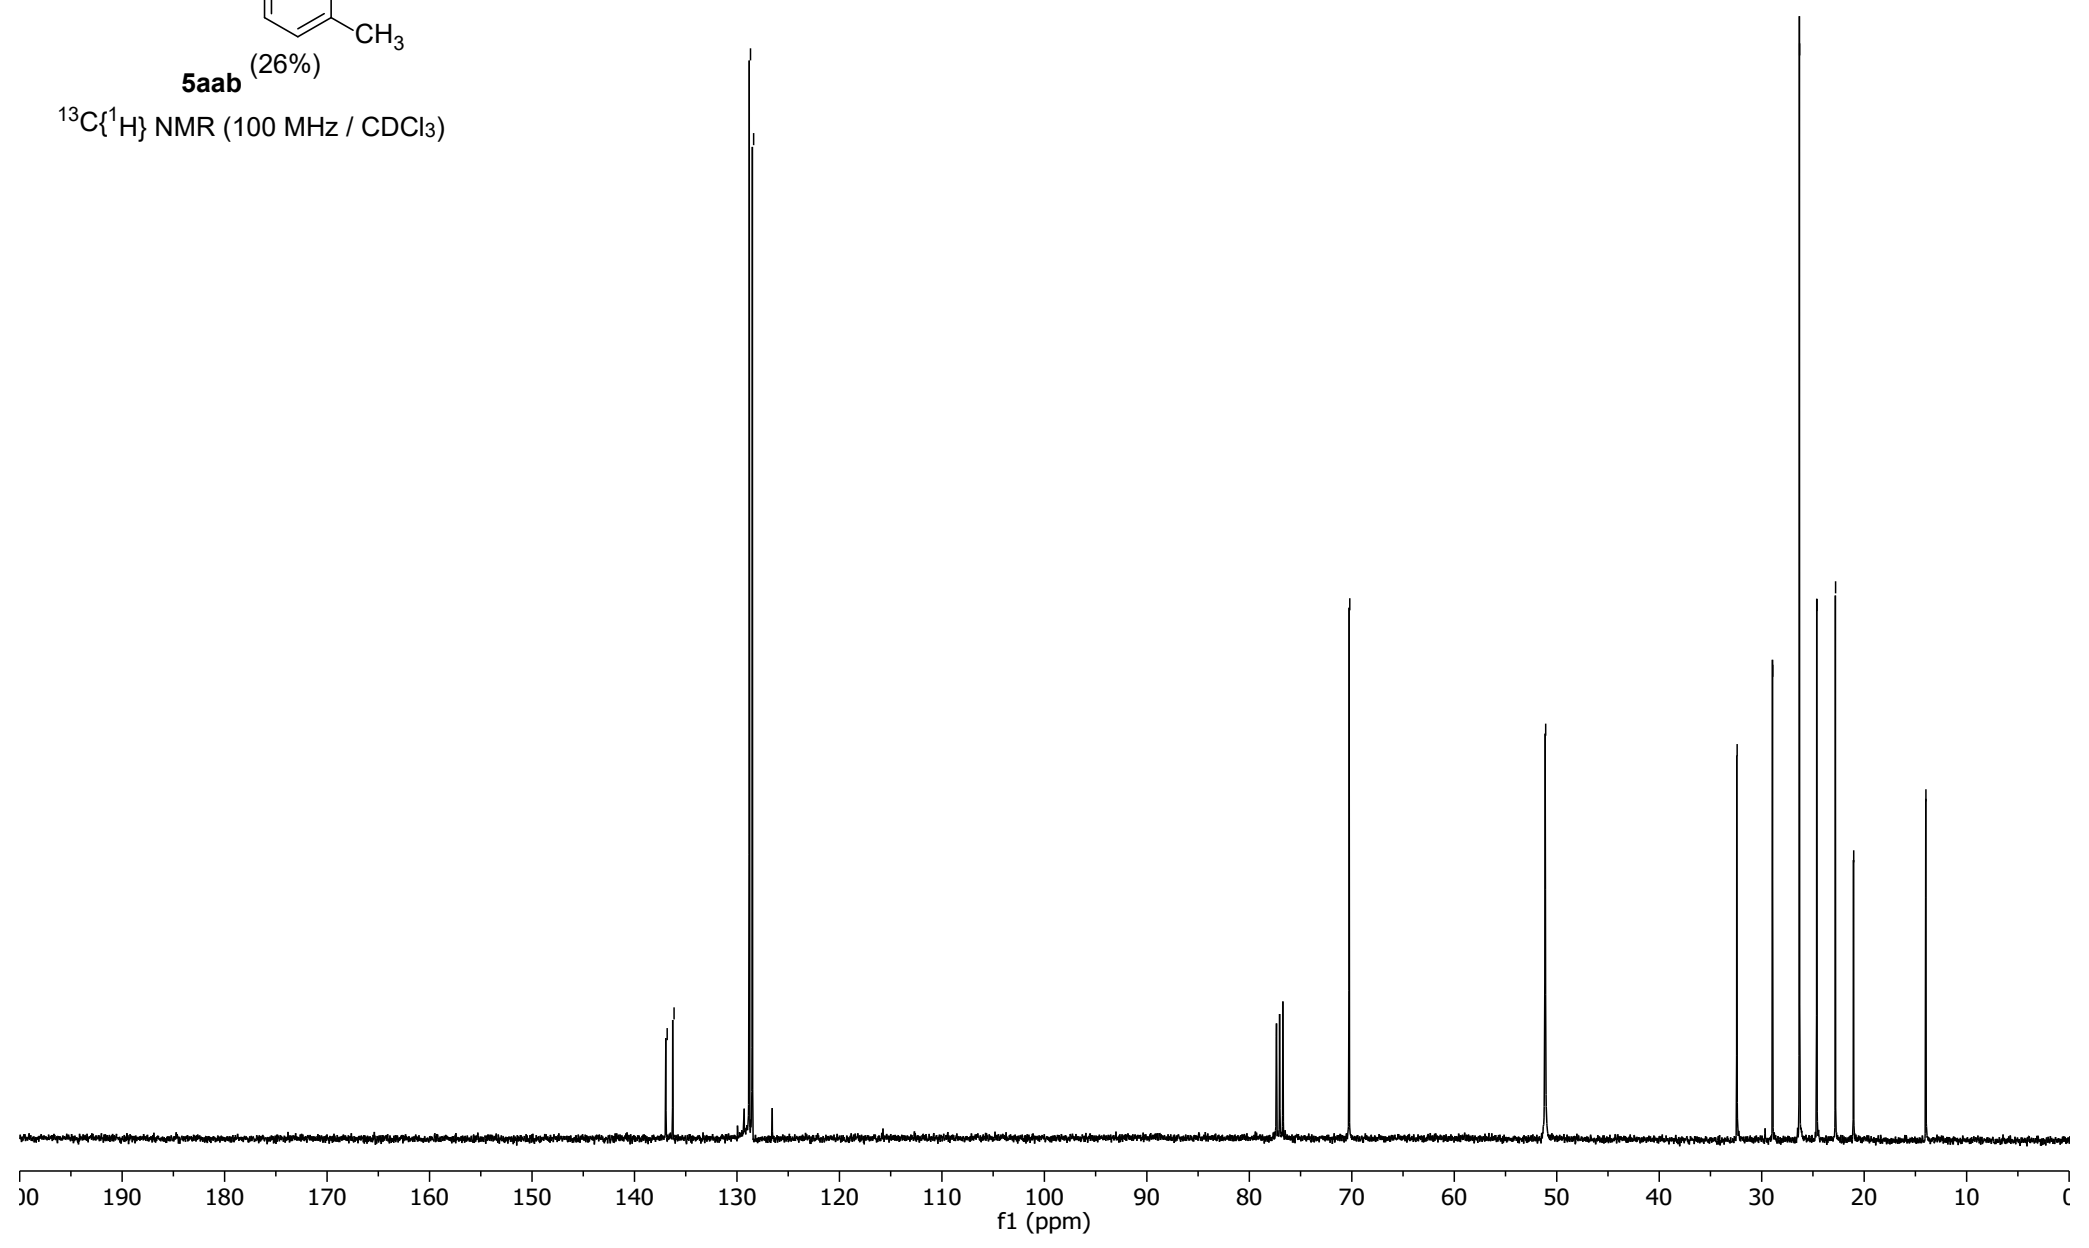

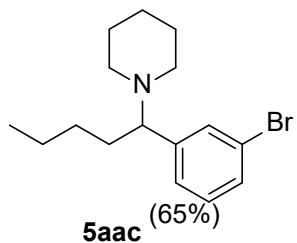

<sup>1</sup>H NMR (400 MHz / CDCl<sub>3</sub>)

7.42  
7.40  
7.23  
7.21  
7.19  
7.18  
7.16

3.31  
3.30  
3.29  
3.28

2.36  
1.92  
1.89  
1.78  
1.74  
1.59  
1.58  
1.56  
1.55  
1.41  
1.39  
1.38  
1.30  
1.28  
1.18  
1.14  
1.108  
1.05  
1.089  
0.87  
0.84

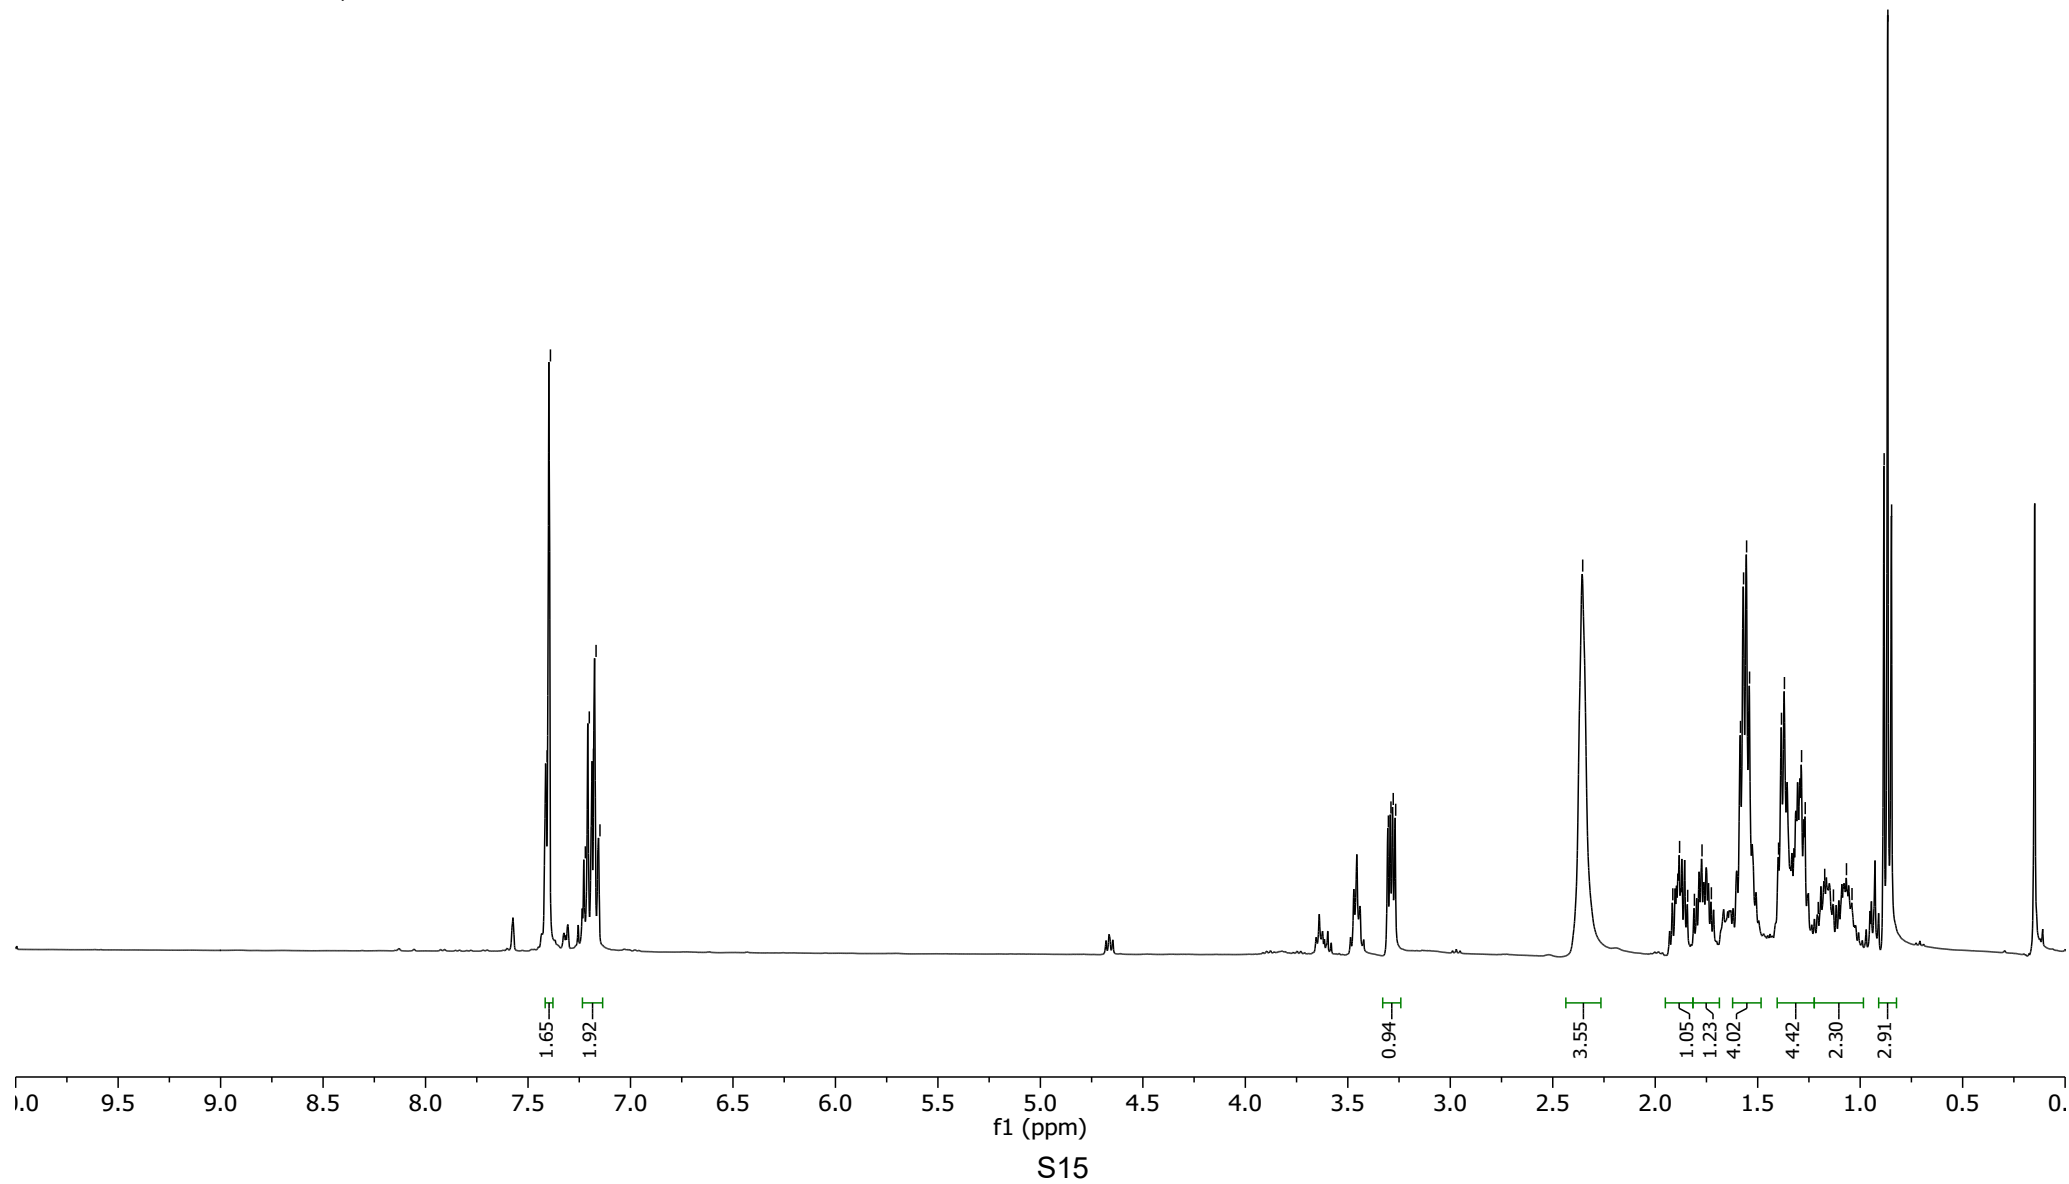



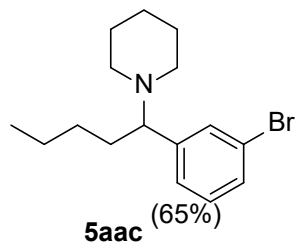

$^{13}\text{C}\{^1\text{H}\}$  NMR (100 MHz /  $\text{CDCl}_3$ )

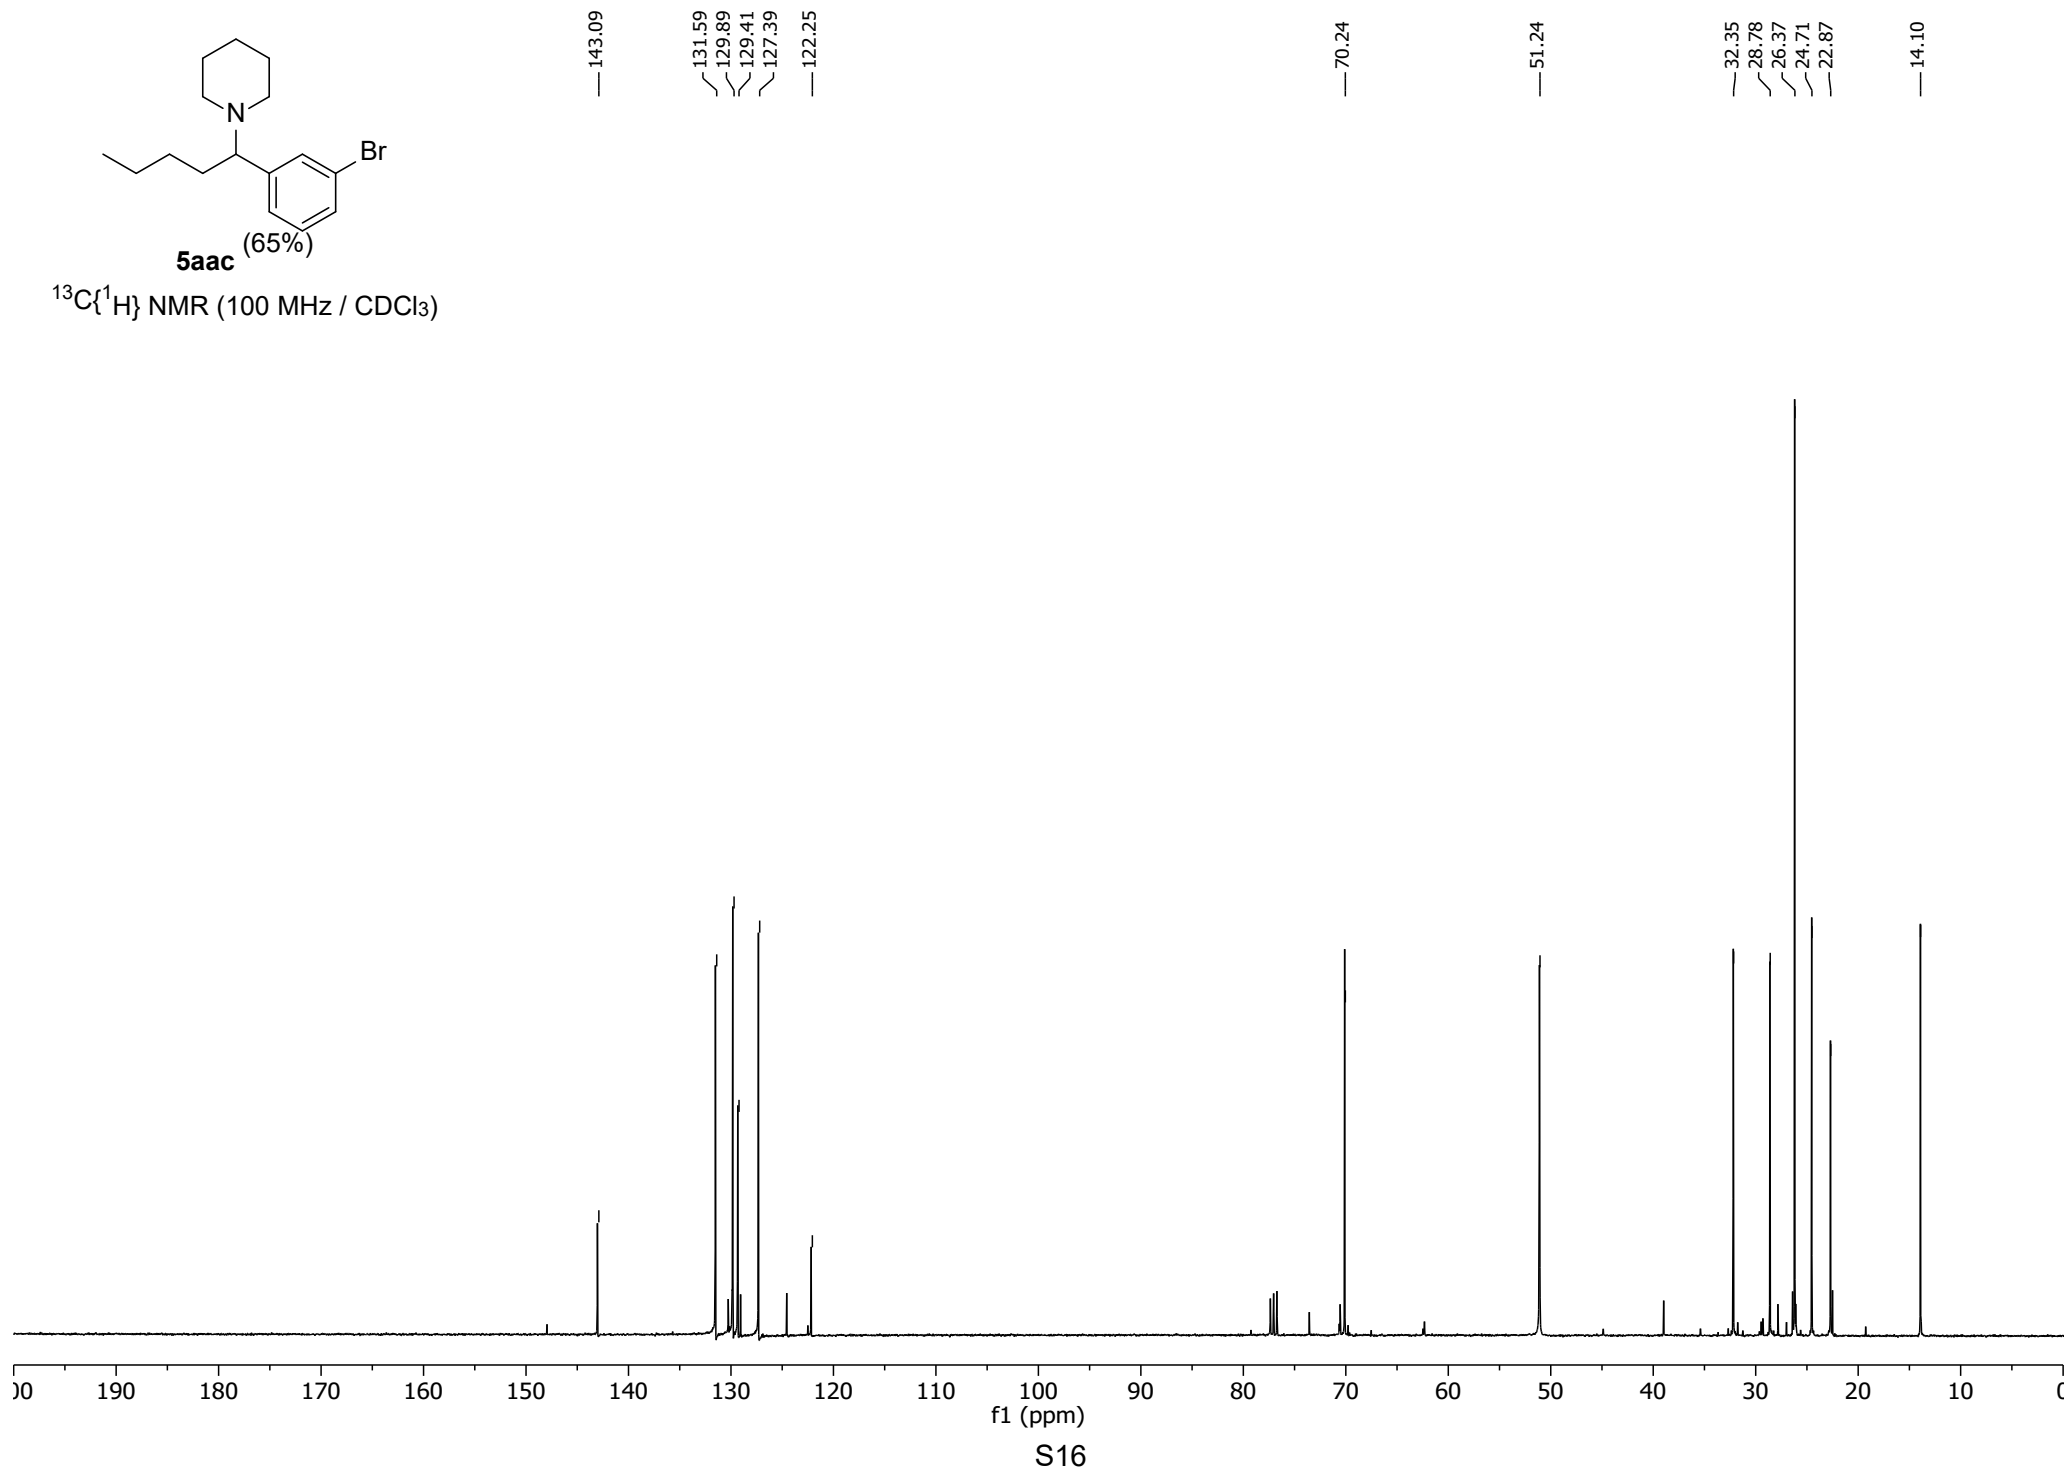

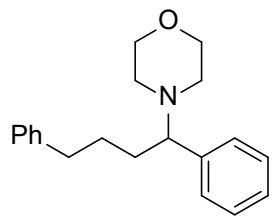

**5bba** (56%)

$^1\text{H}$  NMR (400 MHz /  $\text{CDCl}_3$ )

7.44  
7.42  
7.40  
7.37  
7.35  
7.33  
7.31  
7.28  
7.26  
7.24  
7.21  
7.19

3.78  
3.77  
3.76  
3.36  
3.35  
3.34  
3.32  
2.74  
2.70  
2.68  
2.66  
2.64  
2.63  
2.54  
2.51  
2.47  
2.43  
2.10  
2.07  
2.05  
2.02  
1.97  
1.89  
1.87  
1.86  
1.83  
1.80  
1.67  
1.64  
1.56  
1.50  
1.47

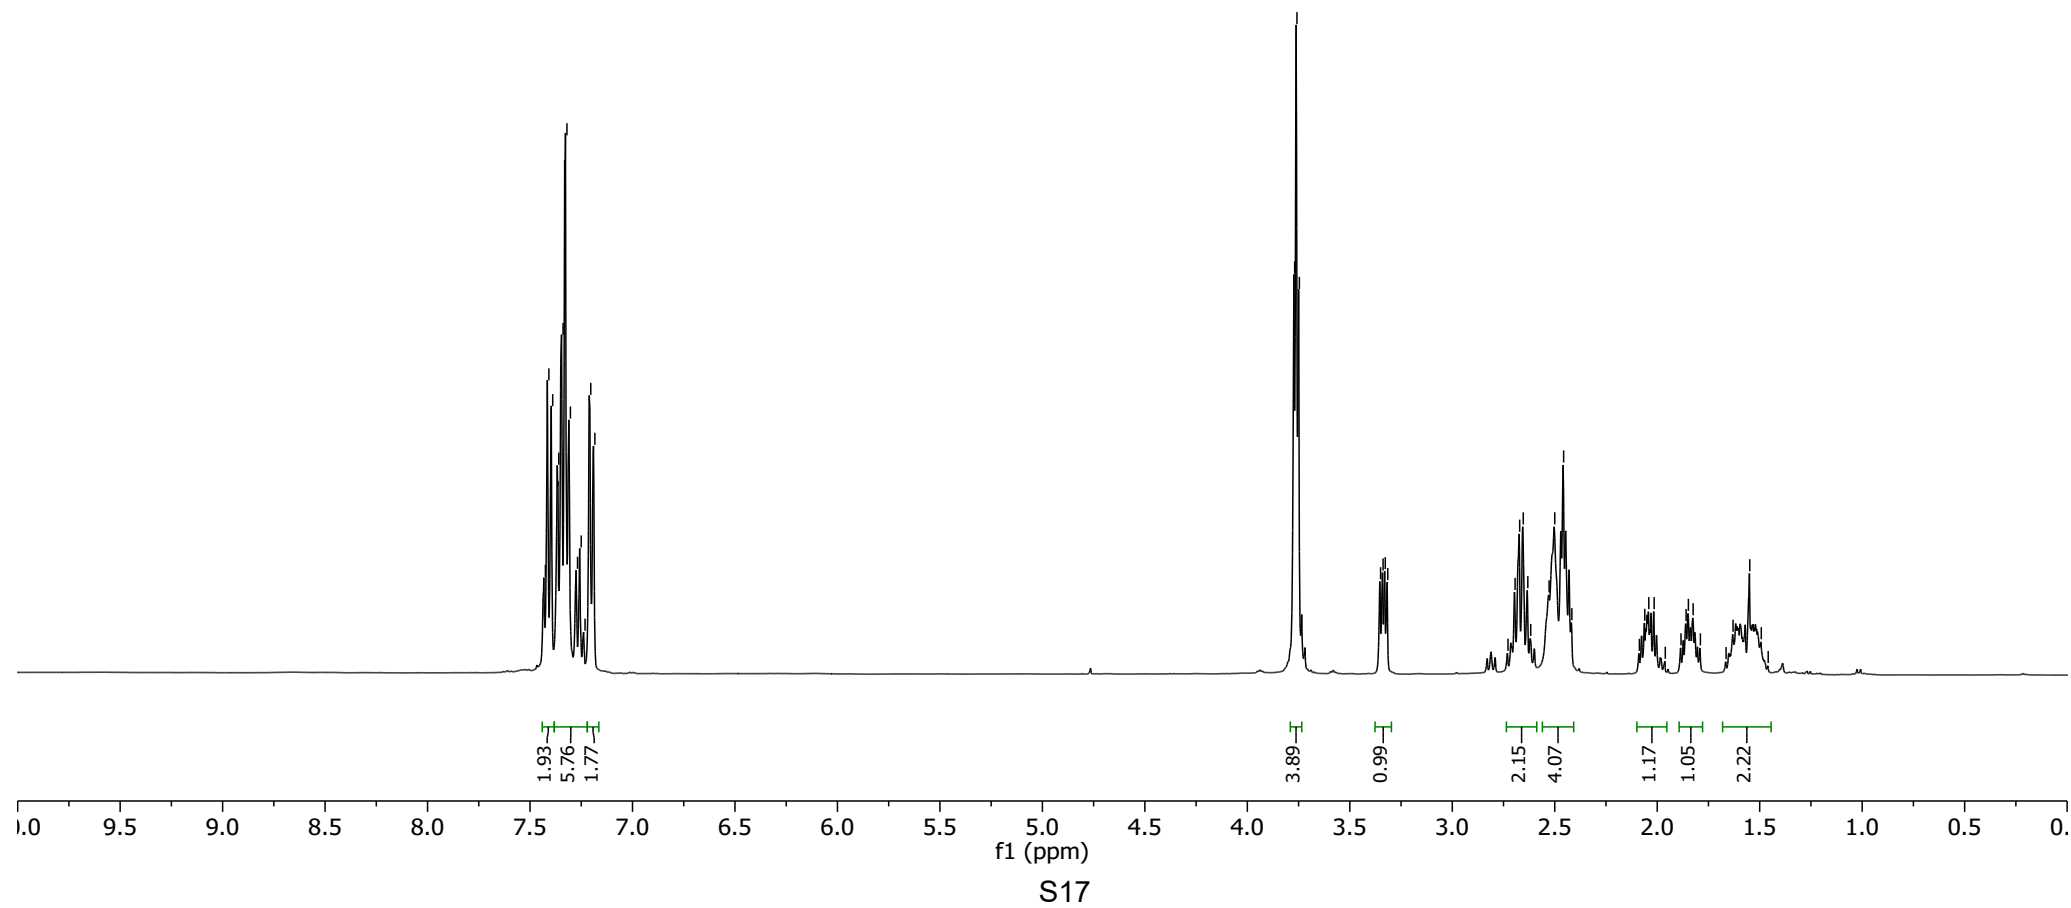

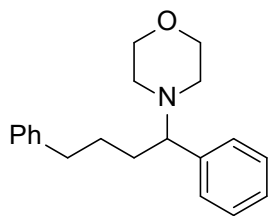

**5bba** (56%)

$^{13}\text{C}\{^1\text{H}\}$  NMR (100 MHz /  $\text{CDCl}_3$ )

- 142.29
- 140.45
- 128.64
- 128.38
- 128.26
- 128.15
- 127.16
- 125.71
- 70.46
- 67.26
- 51.14
- 35.93
- 31.99
- 27.88

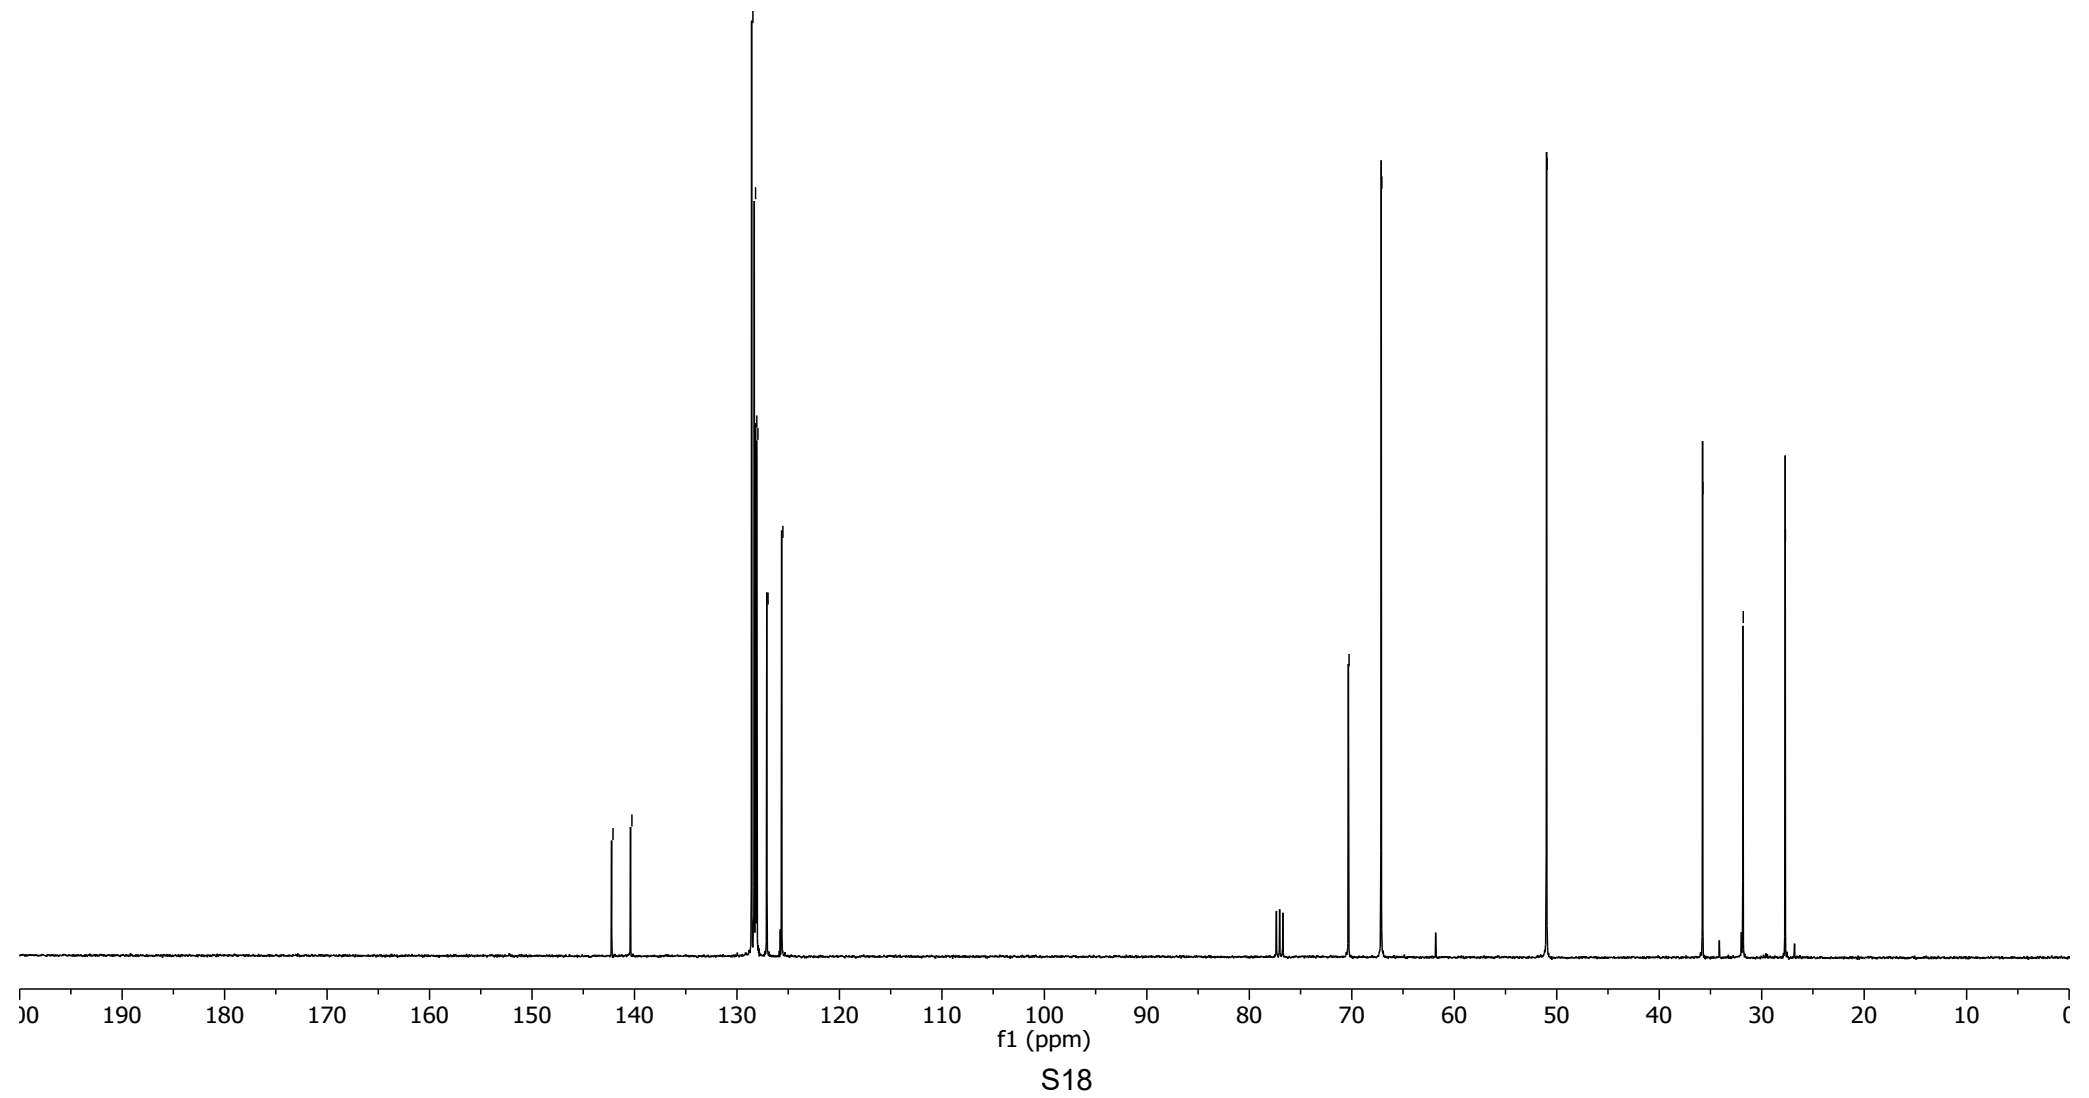

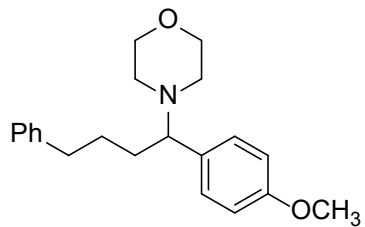

**5bbd** (68%)

$^1\text{H}$  NMR (400 MHz /  $\text{CDCl}_3$ )

7.40  
7.38  
7.37  
7.34  
7.32  
7.31  
7.30  
7.27  
7.25  
7.24  
7.22  
7.19  
6.97  
6.95

3.88  
3.77  
3.76  
3.75  
3.73  
3.71  
3.31  
3.30  
3.29  
3.28

2.82  
2.80  
2.78  
2.72  
2.70  
2.68  
2.66  
2.64  
2.60  
2.52  
2.49  
2.45  
2.42  
2.41  
2.03  
1.98  
1.96  
1.94  
1.87  
1.83  
1.81  
1.77  
1.60  
1.56  
1.51

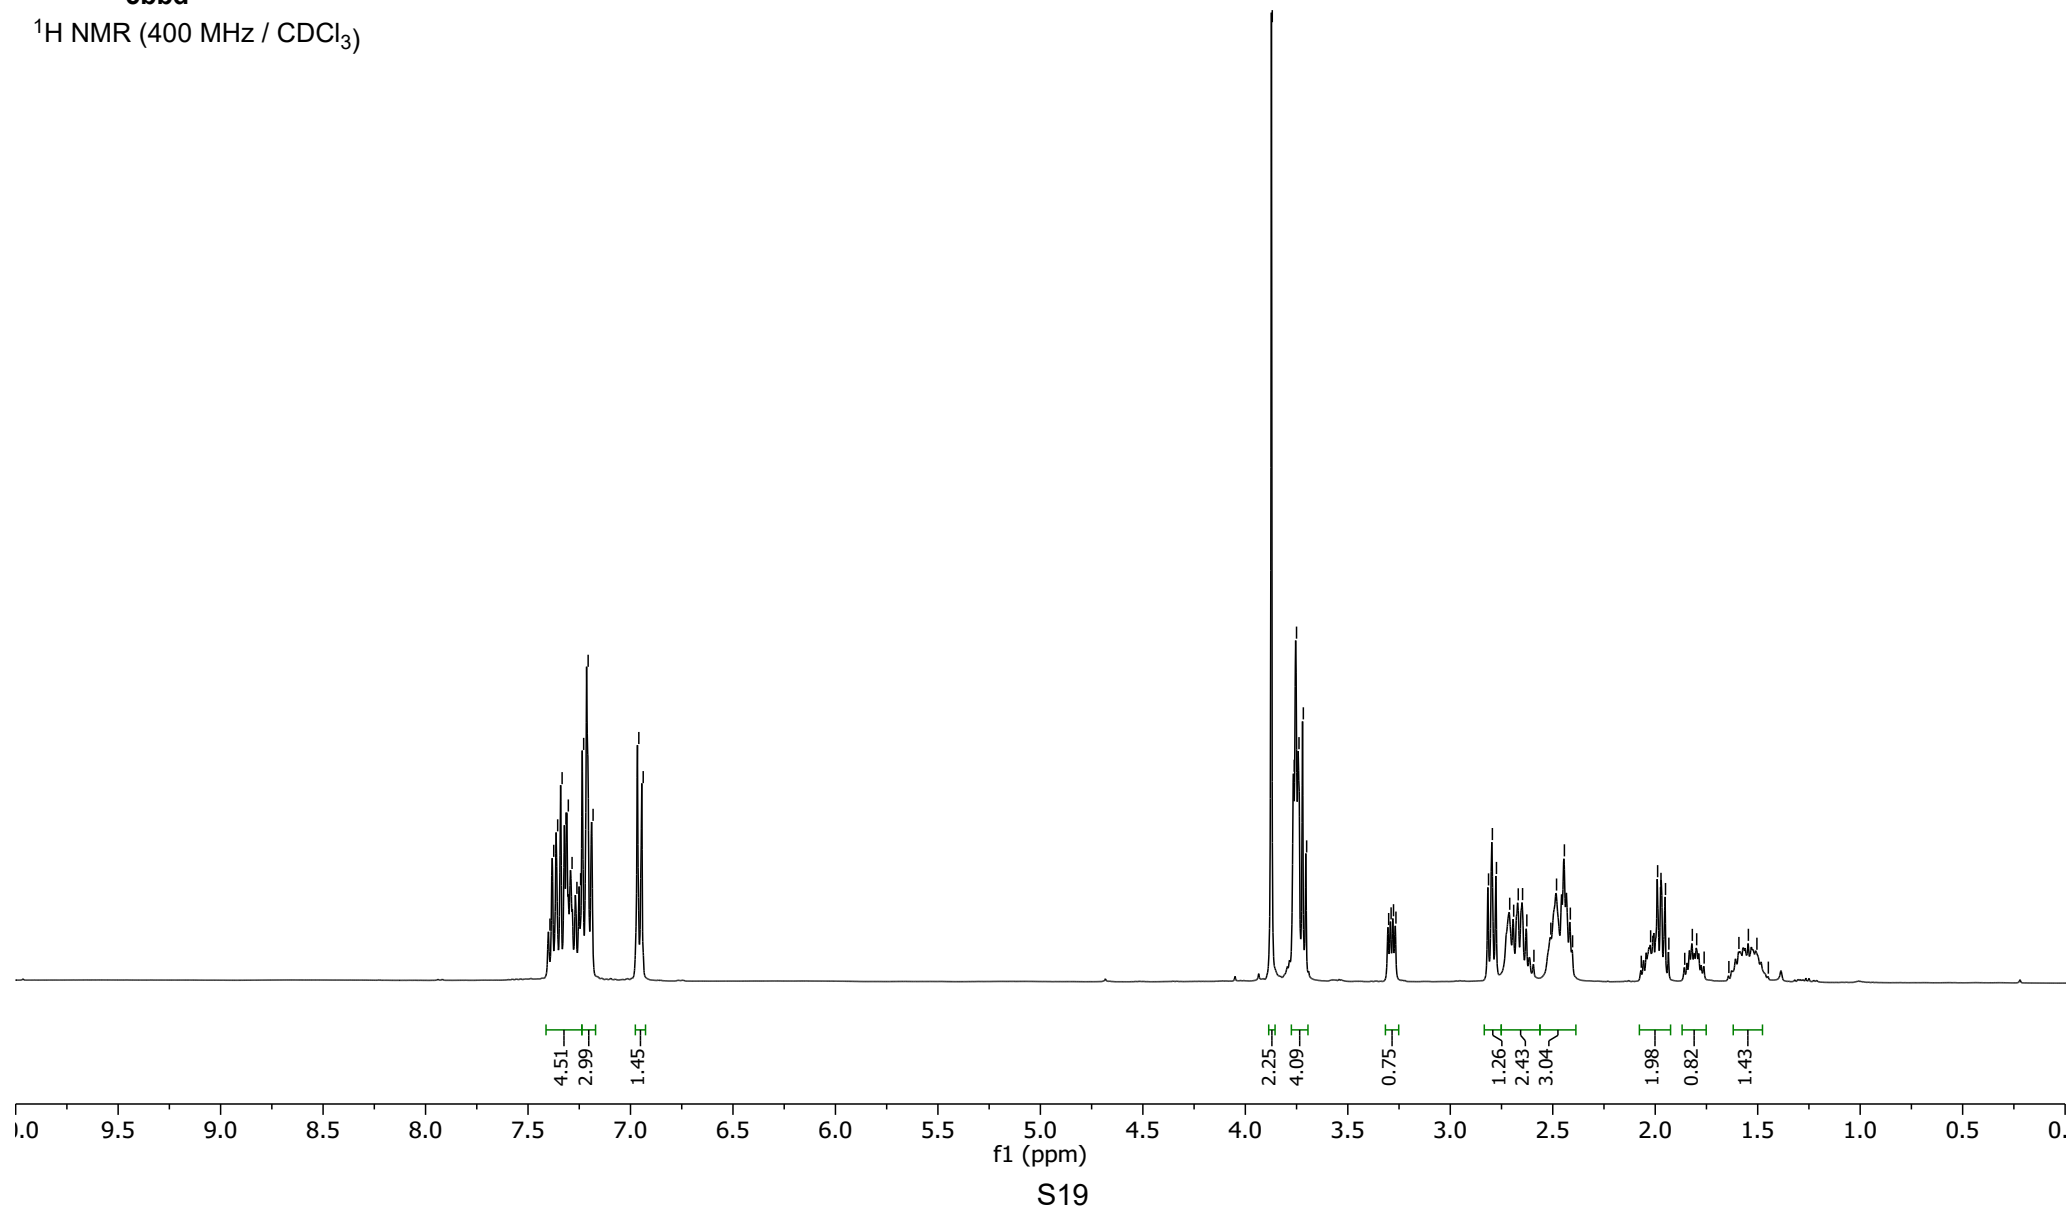

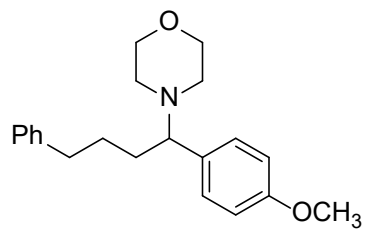

**5bbd** (68%)

$^{13}\text{C}\{^1\text{H}\}$  NMR (100 MHz /  $\text{CDCl}_3$ )

—158.64

—142.26

—132.16

—129.55

—128.32

—128.20

—125.65

—113.45

—69.74

—67.14

—55.11

—51.01

—35.85

—31.94

—27.99

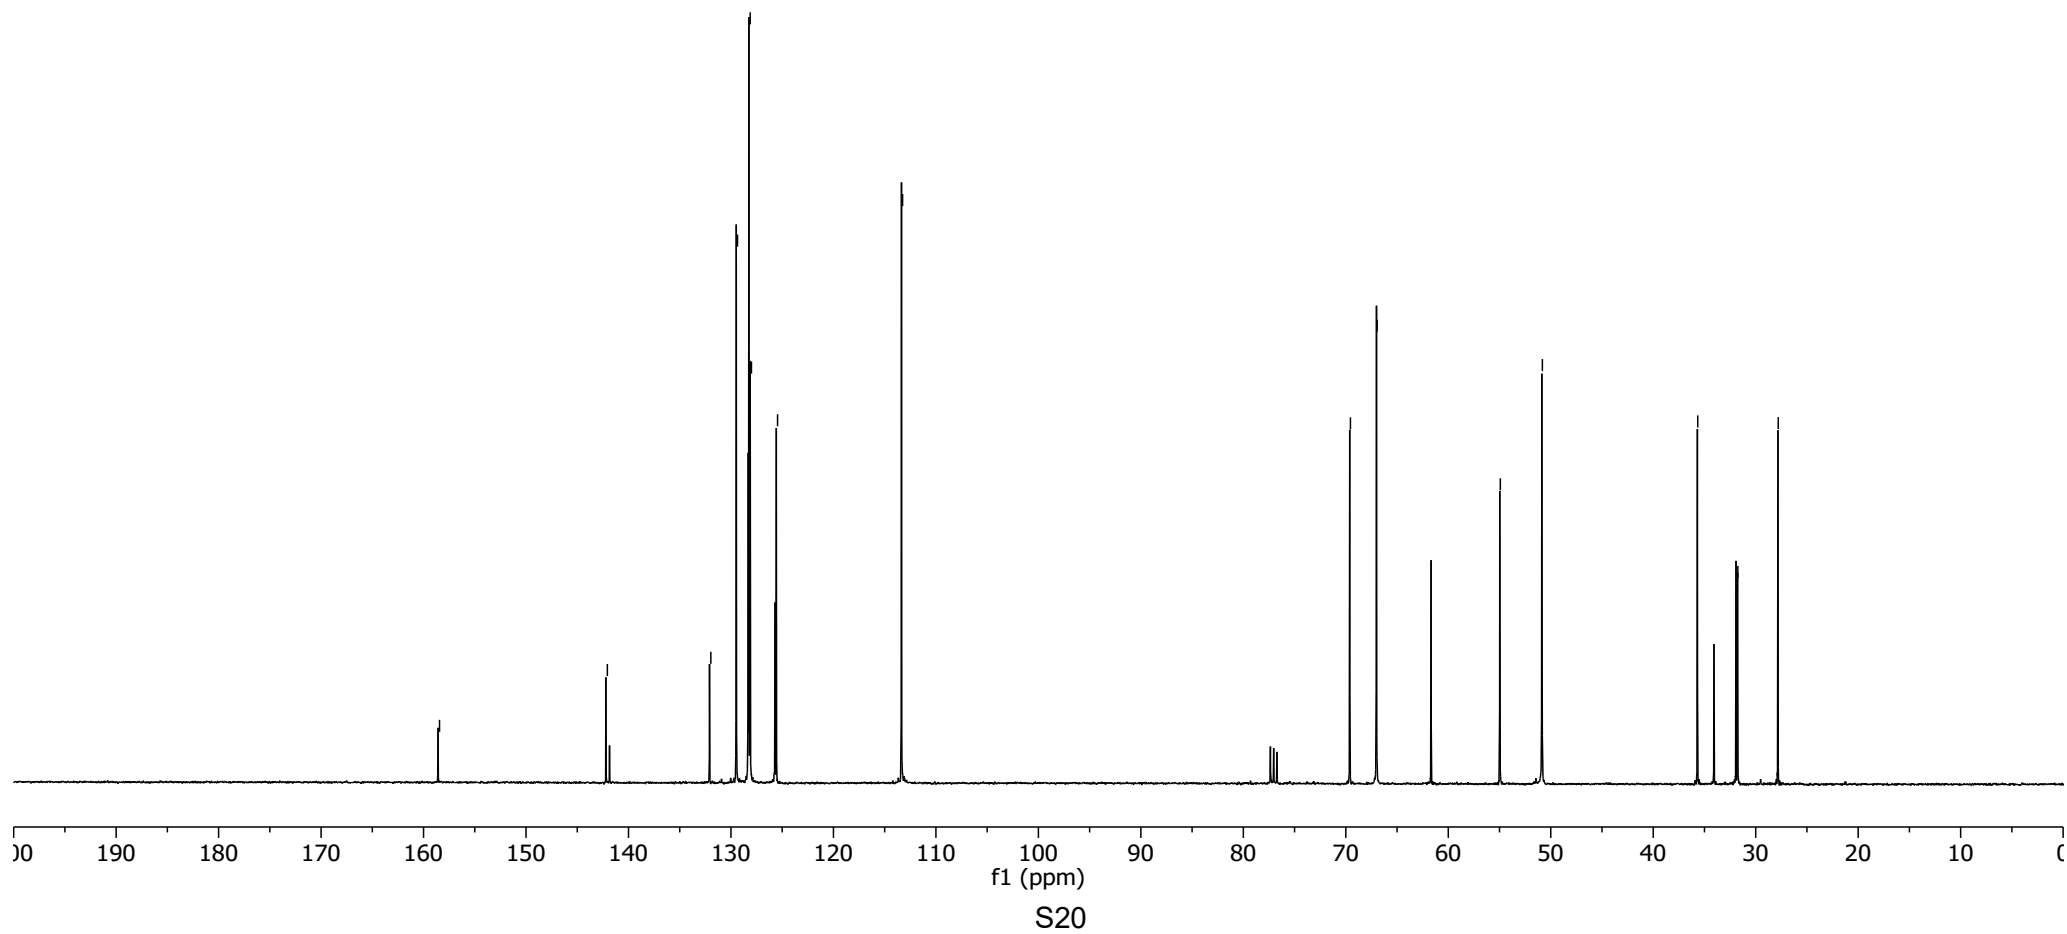

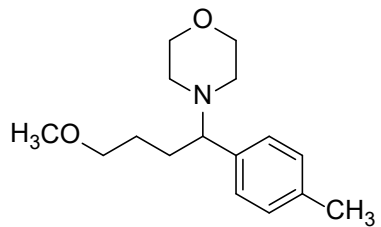

**5cbb** (56%)

$^1\text{H}$  NMR (400 MHz /  $\text{CDCl}_3$ )

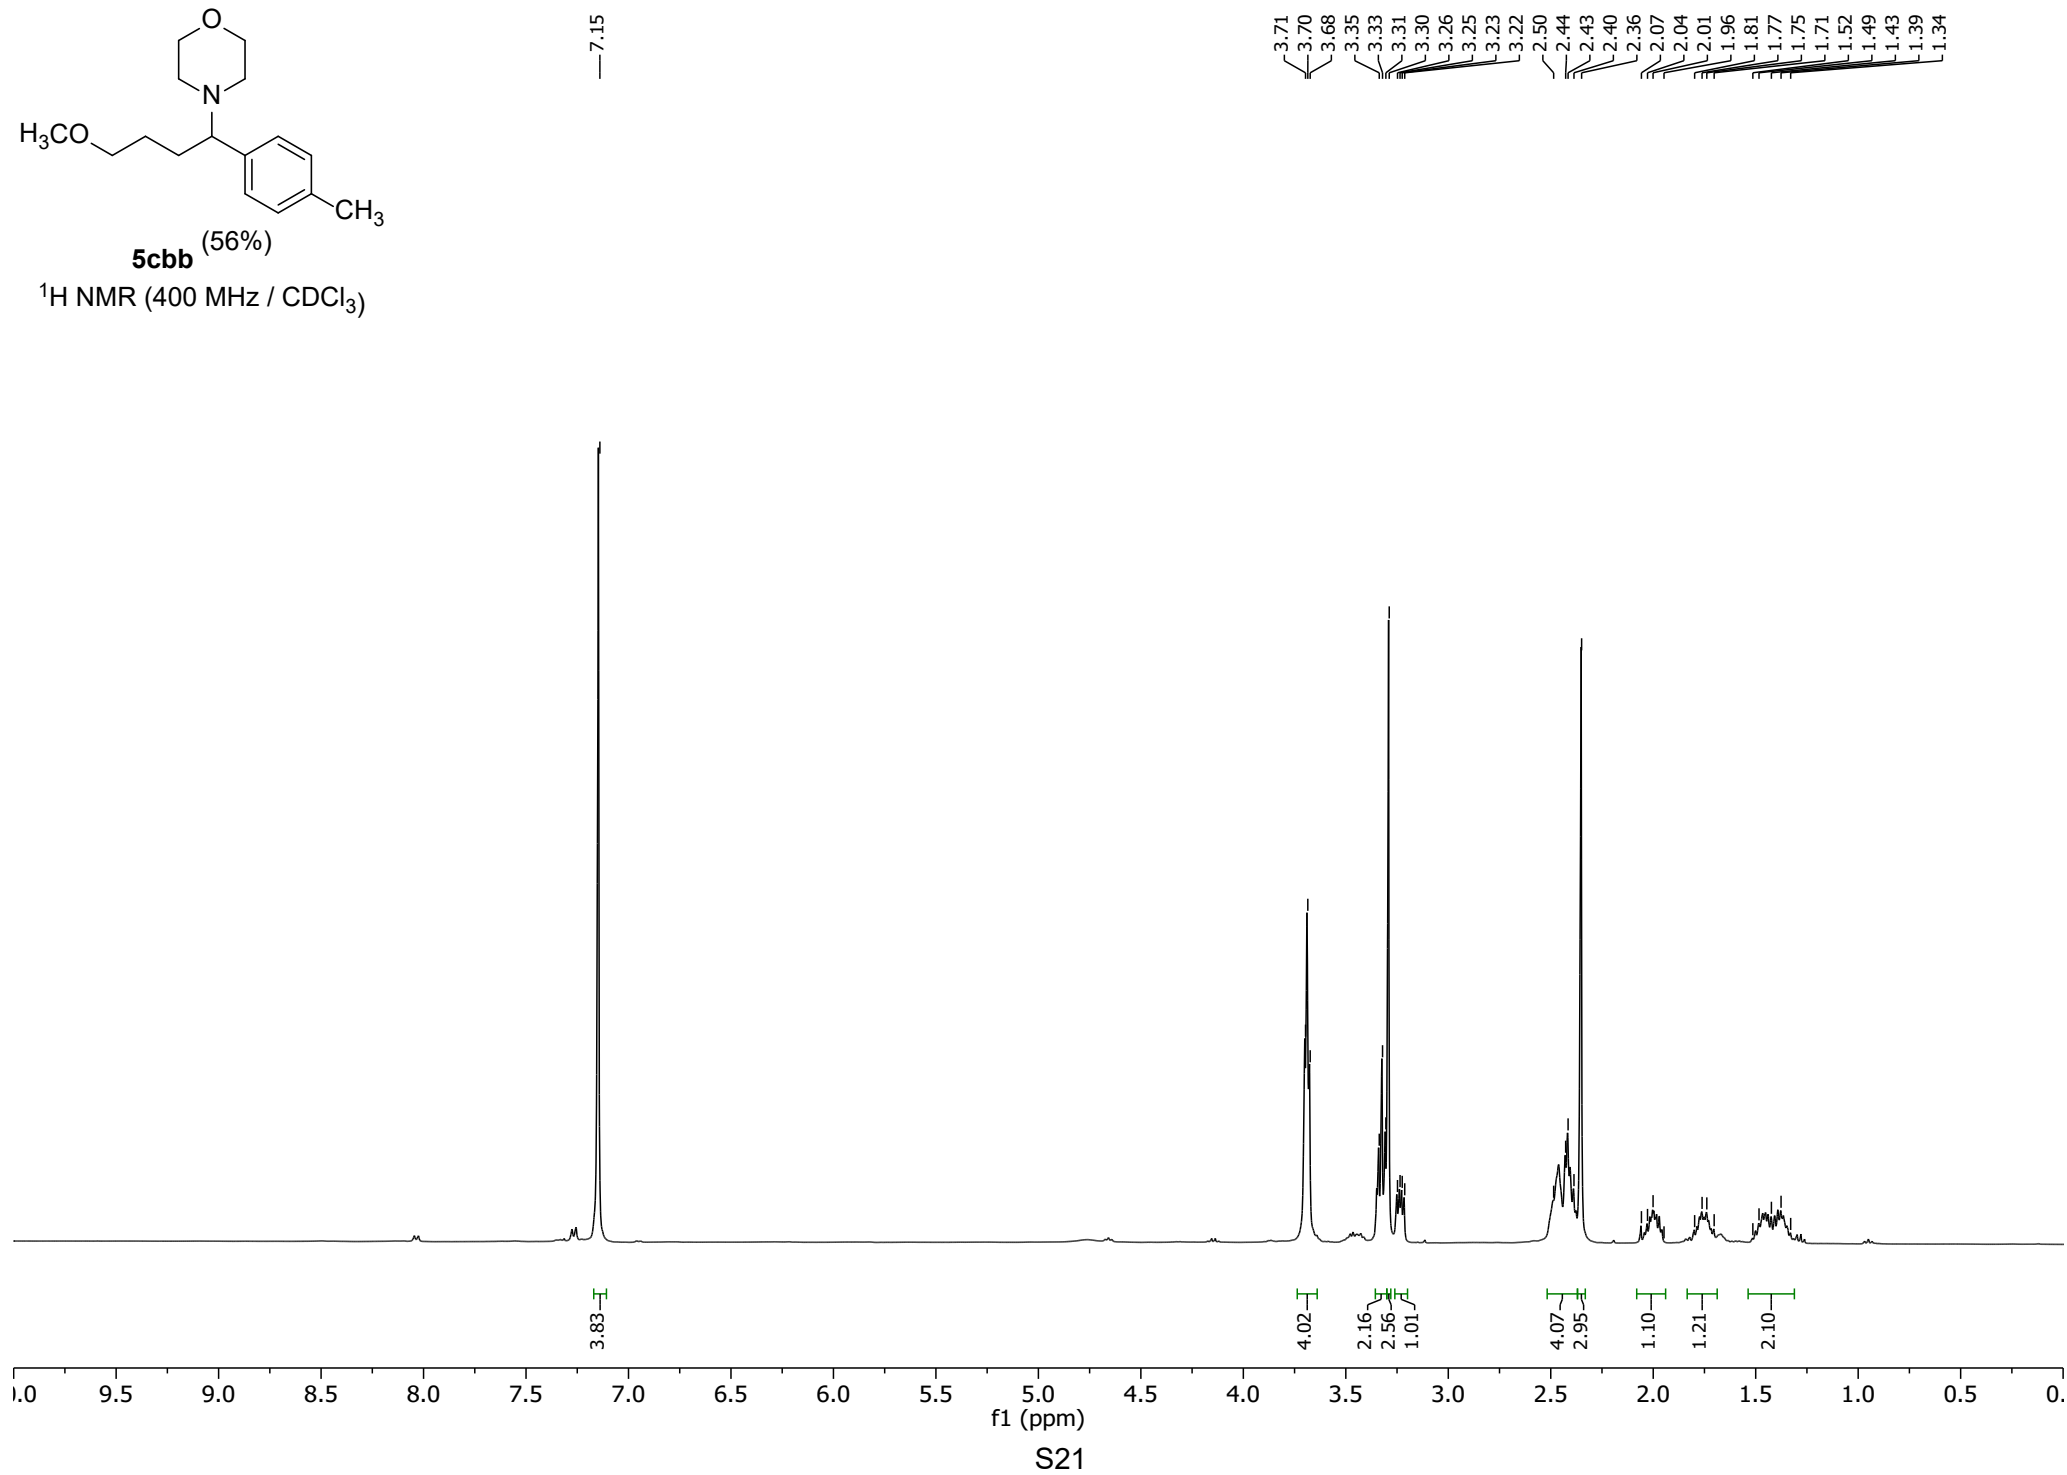

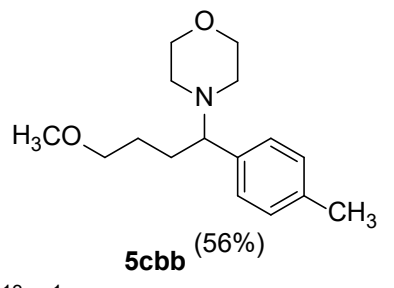

$^{13}\text{C}\{^1\text{H}\}$  NMR (100 MHz /  $\text{CDCl}_3$ )

137.14  
136.62

128.79  
128.49

72.67  
70.02  
67.17

58.40

51.03

28.96  
26.37

21.04

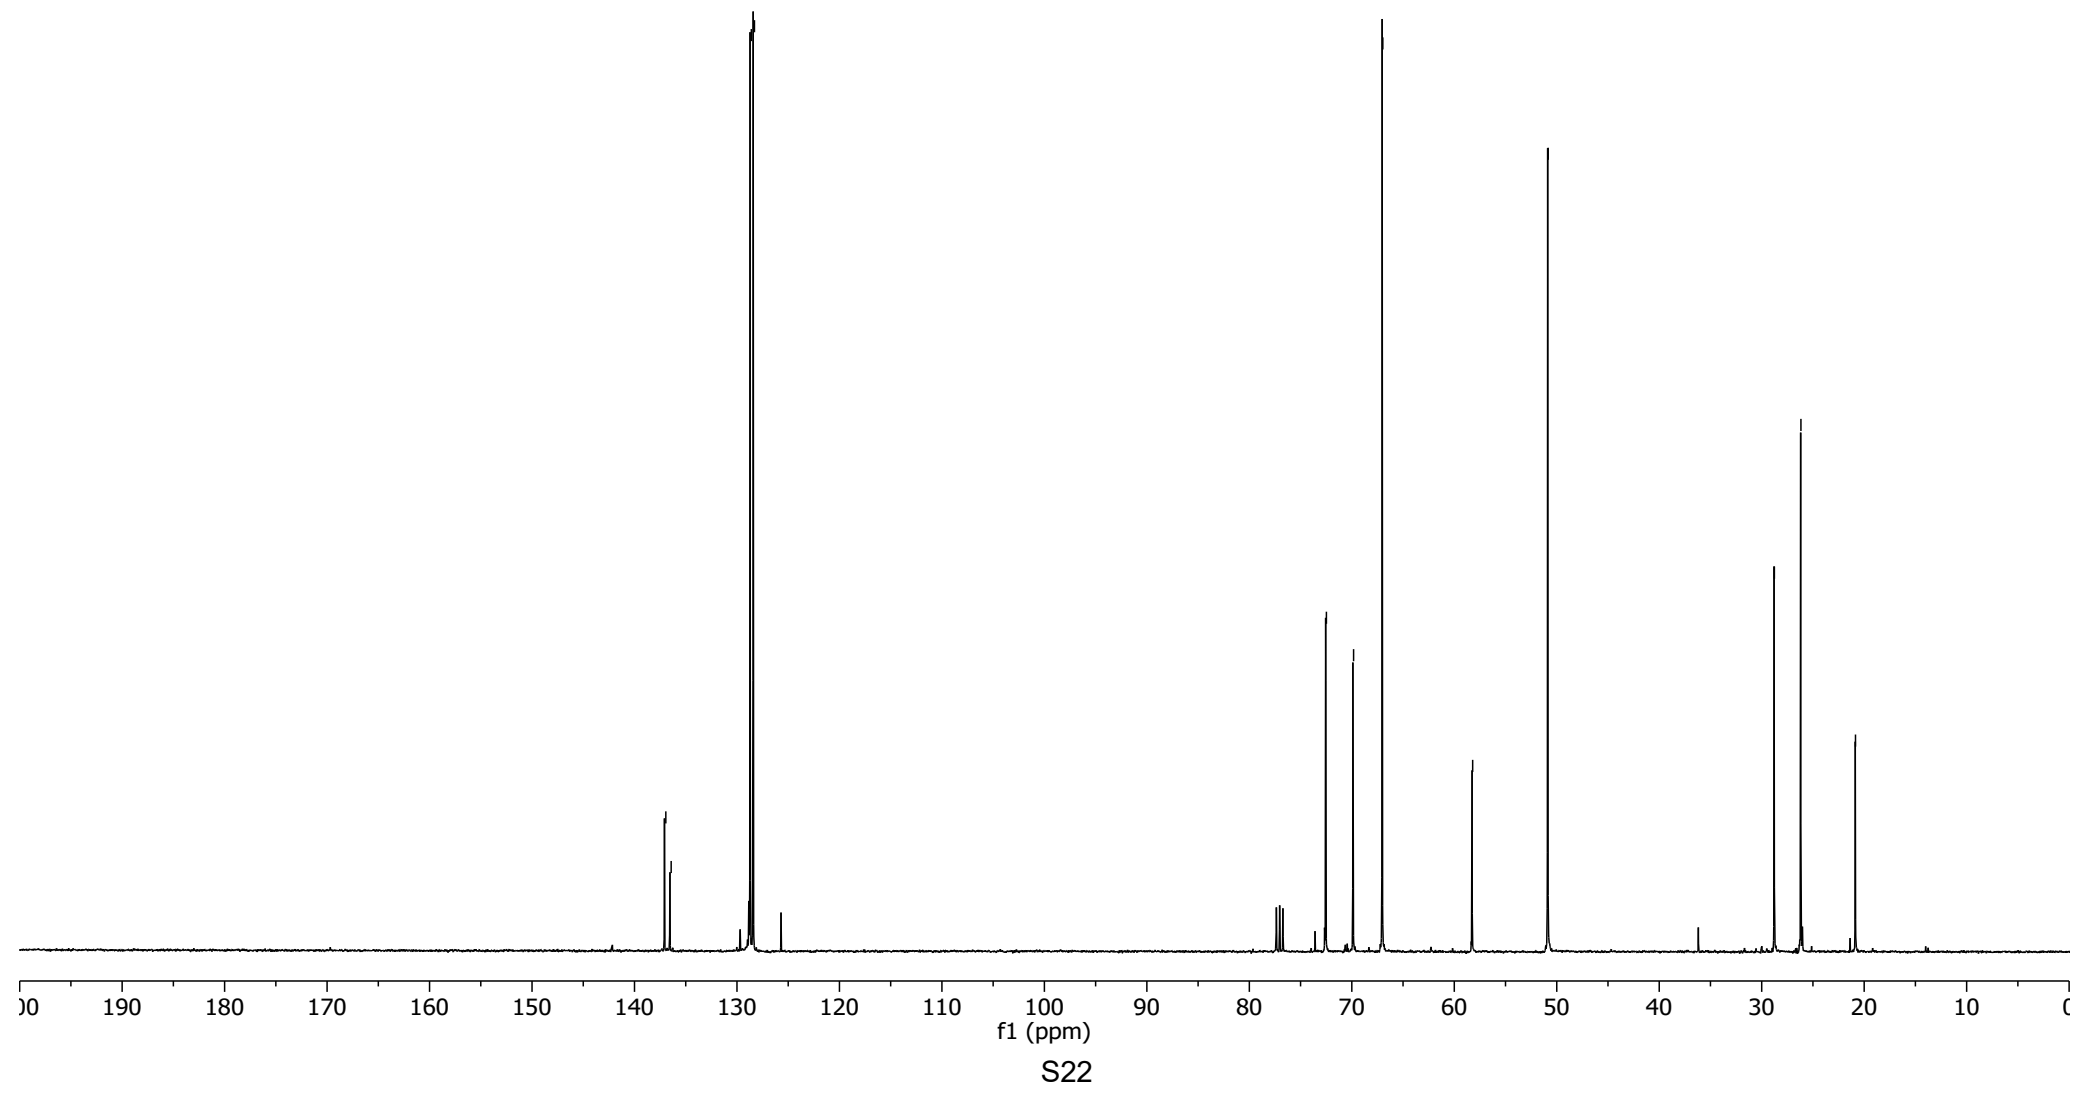

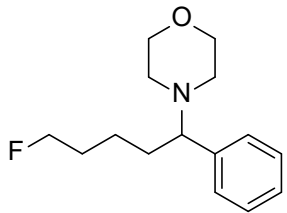

**5eba** (41%)

$^1\text{H}$  NMR (400 MHz /  $\text{CDCl}_3$ )

7.39  
7.37  
7.35  
7.32  
7.31  
7.30  
7.29  
7.27

4.48  
4.46  
4.45  
4.36  
4.35  
4.33

3.74  
3.73  
3.72  
3.31  
3.29  
3.28  
3.27

2.52  
2.50  
2.44  
2.40  
2.04  
2.03  
2.00  
1.97  
1.96  
1.85  
1.81  
1.79  
1.75  
1.72  
1.65  
1.63  
1.38  
1.35  
1.32  
1.27  
1.23  
1.17

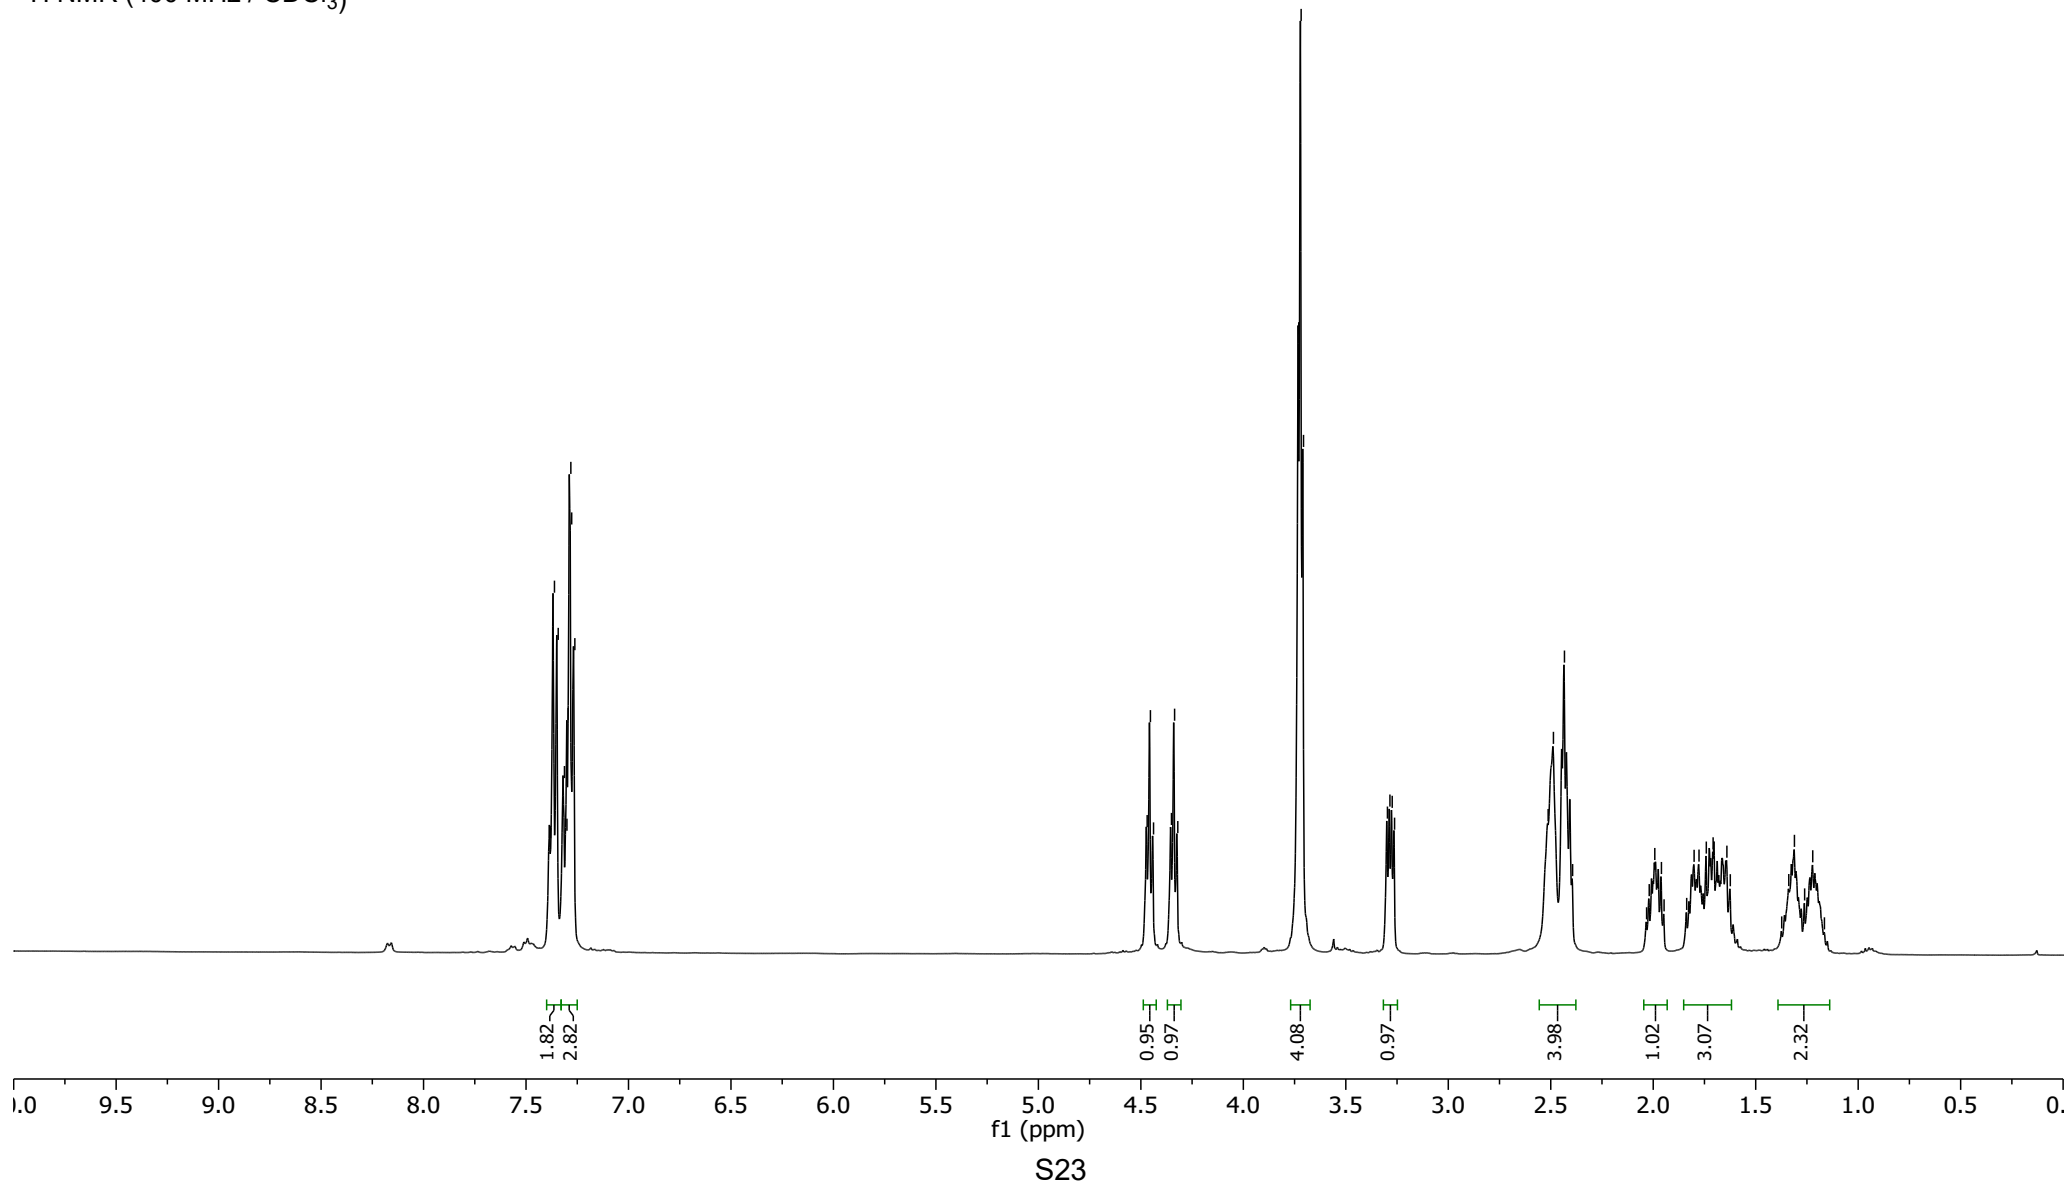



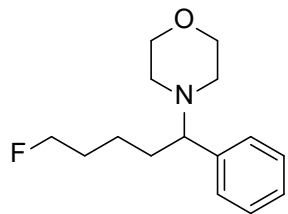

**5eba** (41%)

$^{13}\text{C}\{^1\text{H}\}$  NMR (100 MHz /  $\text{CDCl}_3$ )

— 140.22

128.67  
128.23  
127.30

84.80  
83.17

— 70.54  
— 67.25

— 51.14

32.11  
30.61  
30.42

22.06  
22.02

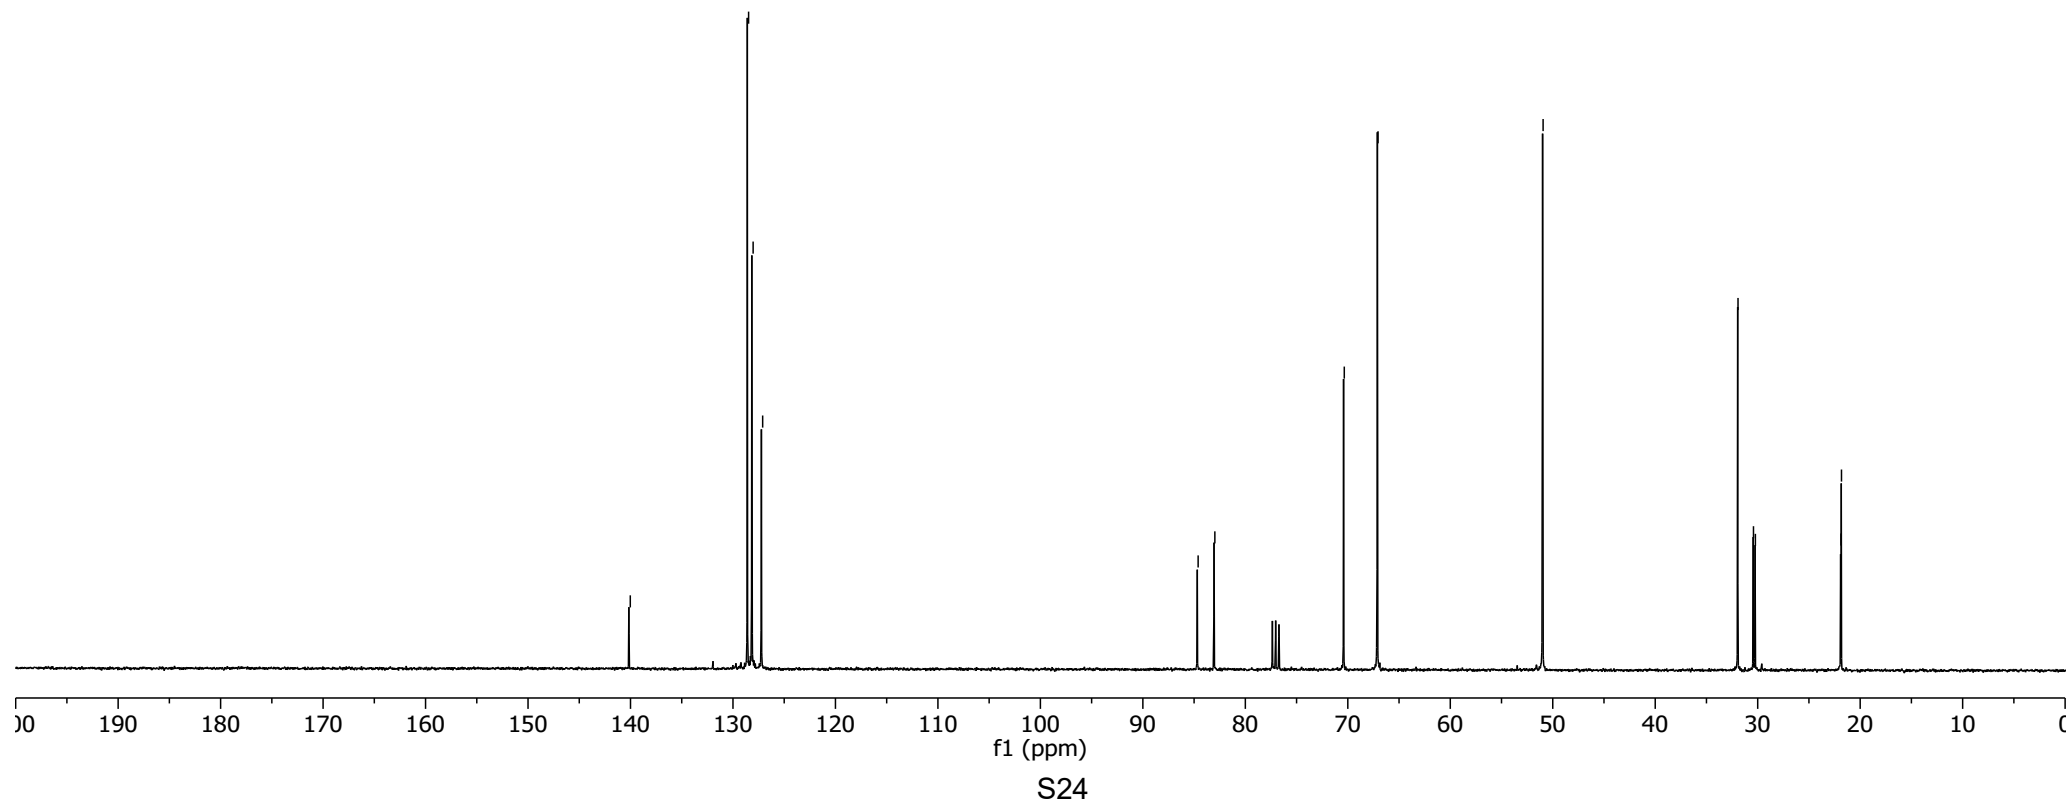

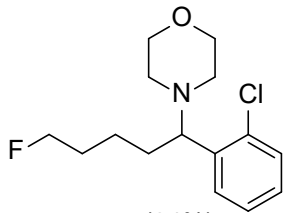

**5ebe** (24%)

$^1\text{H}$  NMR (400 MHz /  $\text{CDCl}_3$ )

7.45  
7.44  
7.43  
7.42  
7.36  
7.36  
7.34  
7.34  
7.27  
7.27  
7.25  
7.25  
7.23  
7.23  
7.19  
7.18  
7.17  
7.16  
7.15  
7.14

4.43  
4.41  
4.40  
4.31  
4.30  
4.28  
3.97  
3.96  
3.95  
3.94  
3.67  
3.66  
3.65

2.55  
2.54  
2.52  
2.40  
2.39  
2.38  
2.36  
2.35  
1.97  
1.95  
1.91  
1.88  
1.76  
1.69  
1.67  
1.57  
1.56  
1.33  
1.30  
1.25  
1.21  
1.18  
1.14

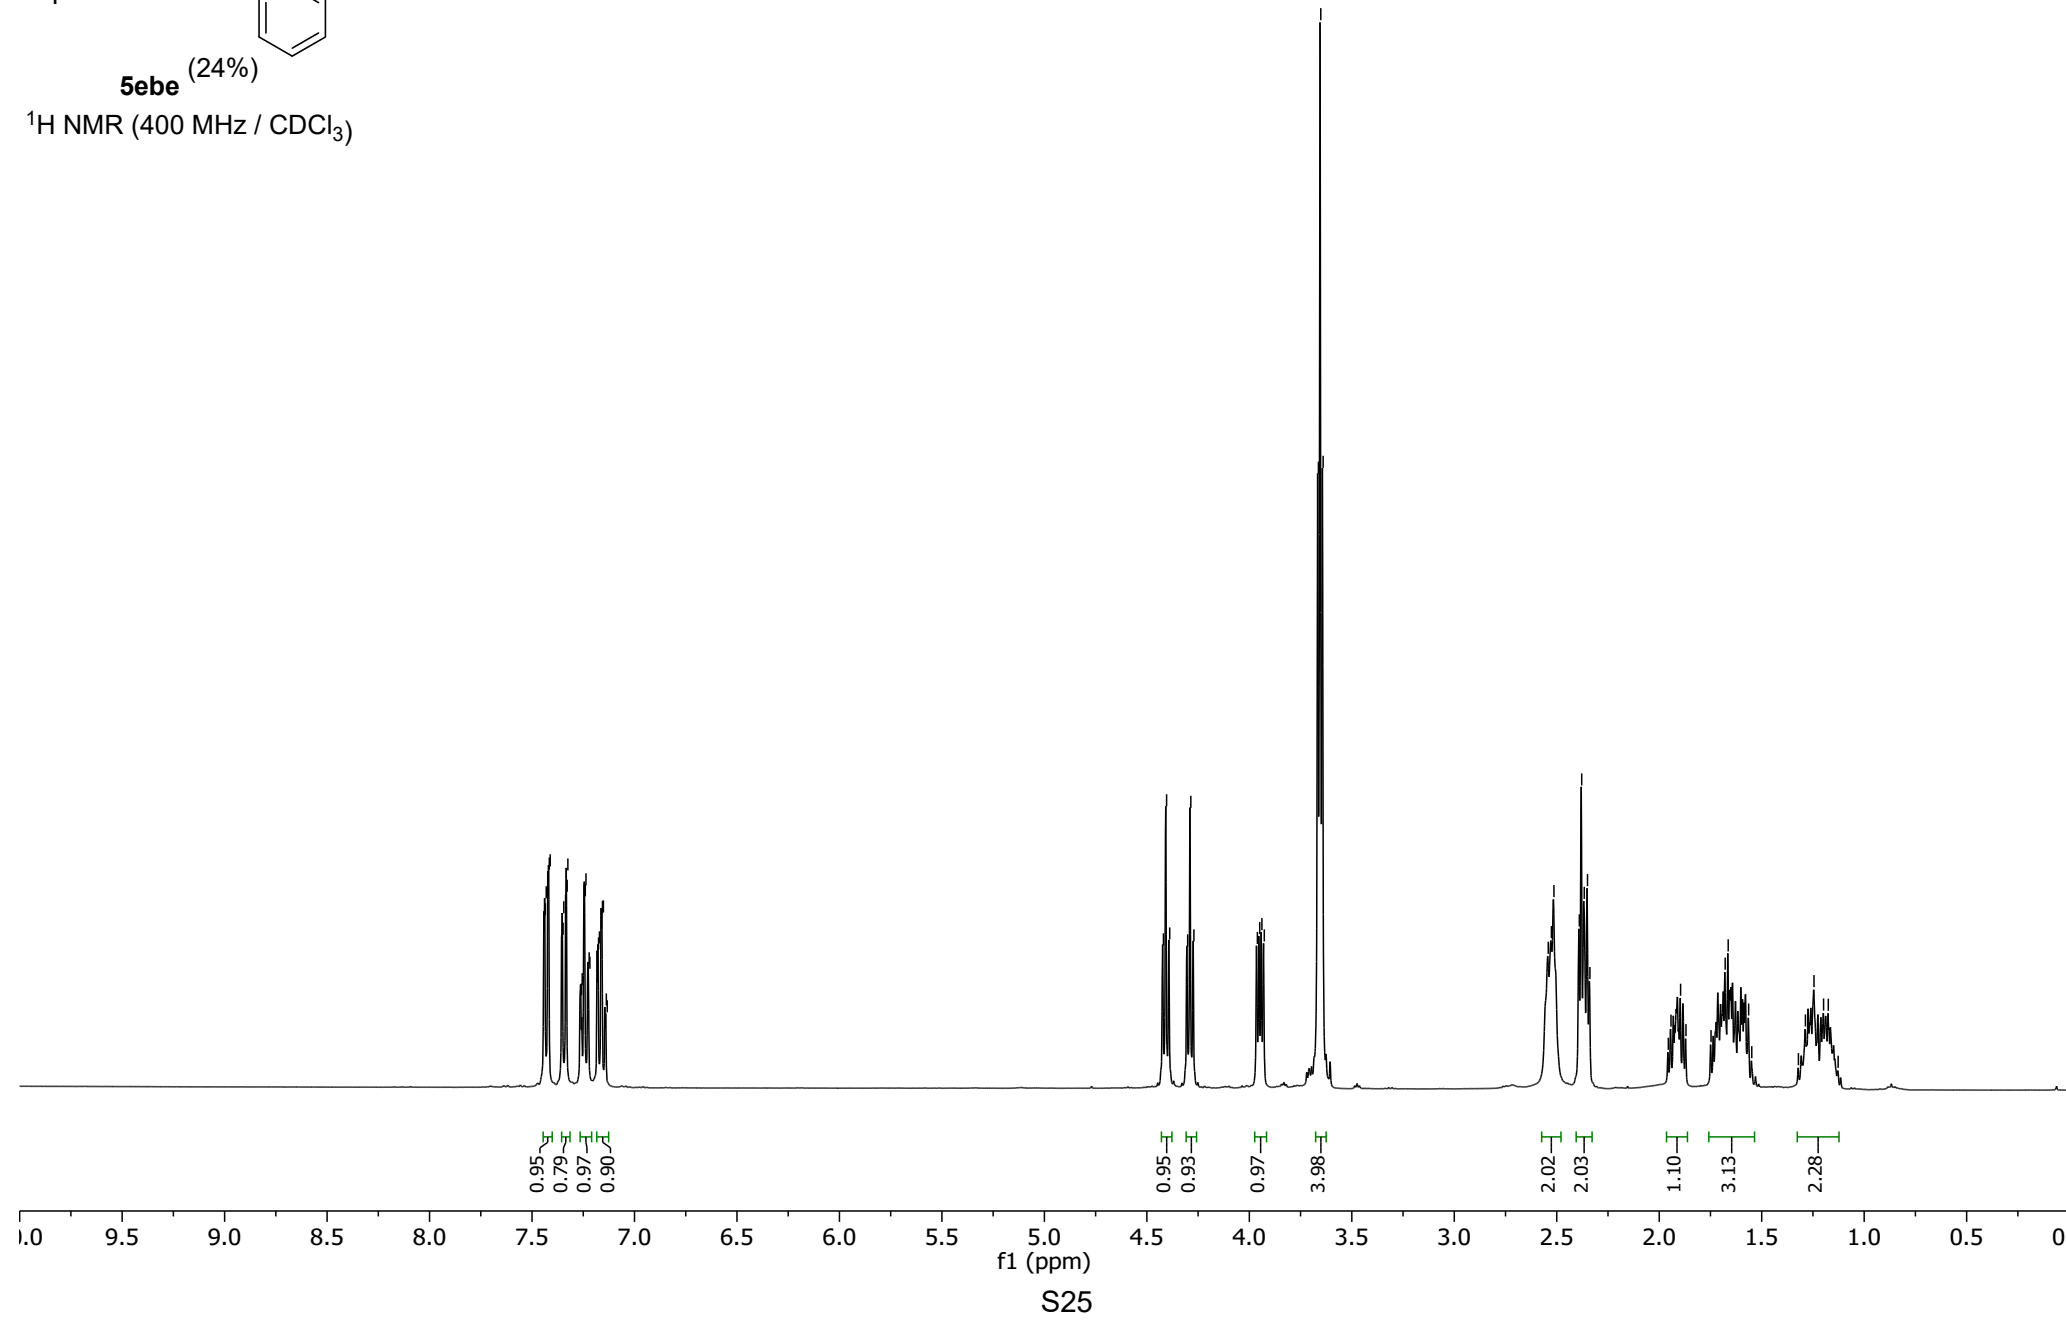

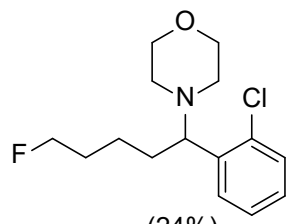

**5ebe** (24%)

$^{13}\text{C}\{^1\text{H}\}$  NMR (100 MHz /  $\text{CDCl}_3$ )

— 138.62  
— 135.03  
— 129.62  
— 129.22  
— 128.11  
— 126.83

— 84.83  
— 83.20

— 67.34  
— 64.48

— 51.11

— 31.81  
— 30.71  
— 30.52

— 21.15  
— 21.10

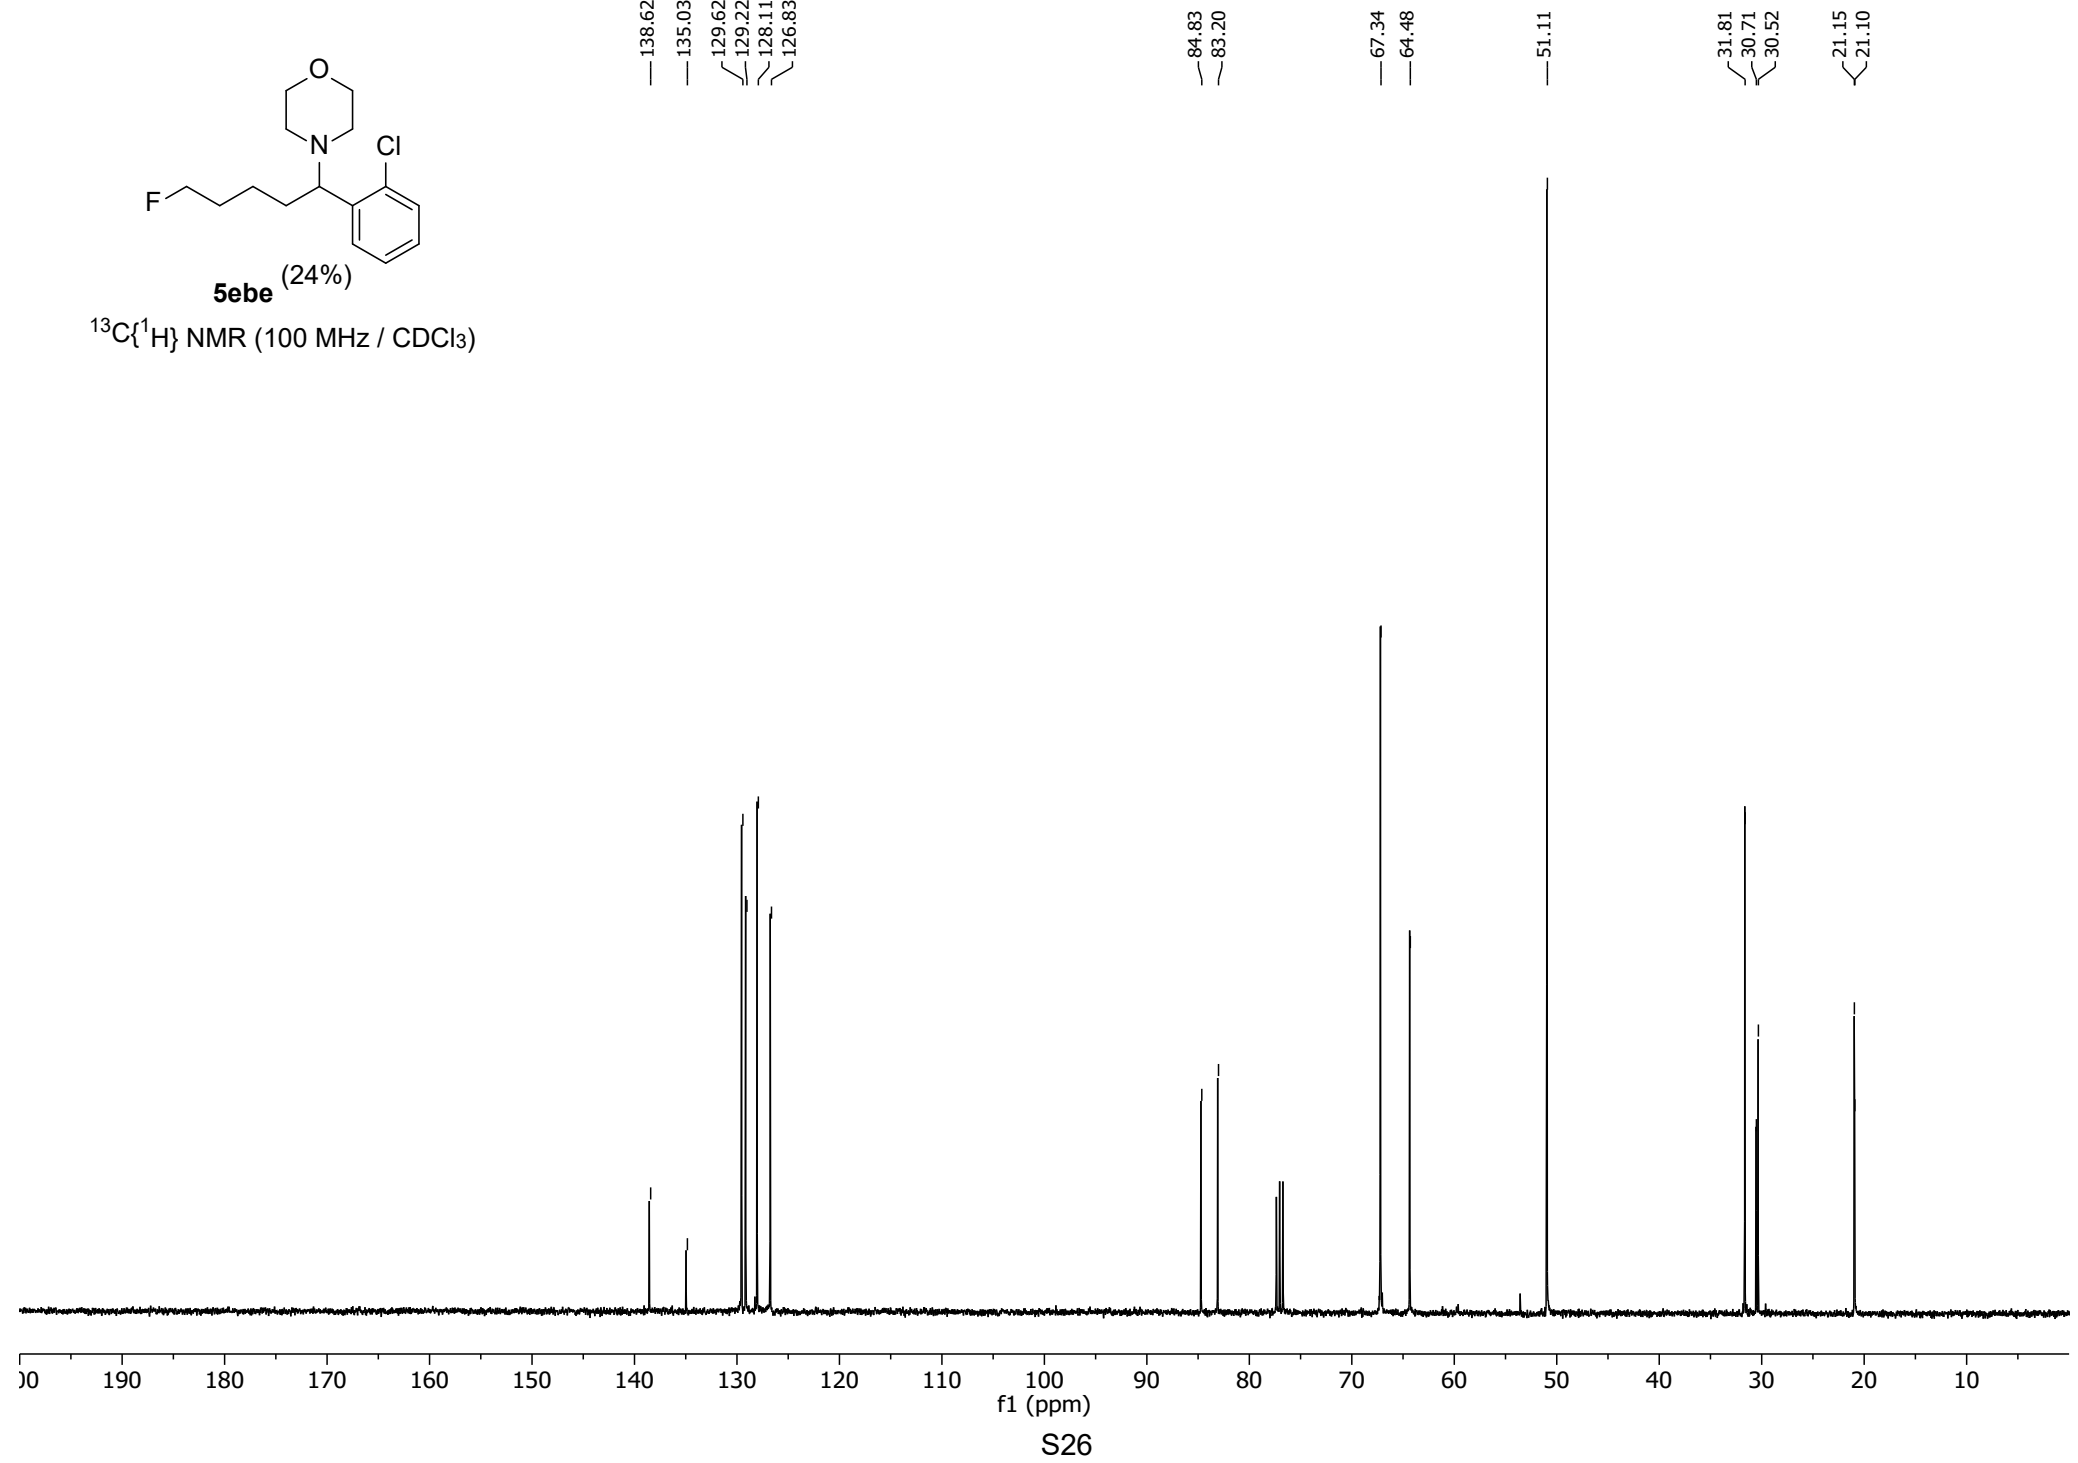

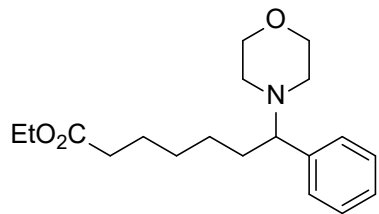

(52%)

**5gba**

<sup>1</sup>H NMR (400 MHz / CDCl<sub>3</sub>)

7.36  
7.34  
7.32  
7.30  
7.28  
7.26  
7.24

4.15  
4.13  
4.11  
4.10  
3.72  
3.71  
3.70  
3.28  
3.27  
3.25  
3.24

2.51  
2.49  
2.42  
2.38  
2.26  
2.24  
2.22

1.96  
1.93  
1.79  
1.77  
1.71  
1.67  
1.61  
1.57  
1.53  
1.44  
1.28  
1.28  
1.26  
1.24  
1.19  
1.17  
1.10  
1.08

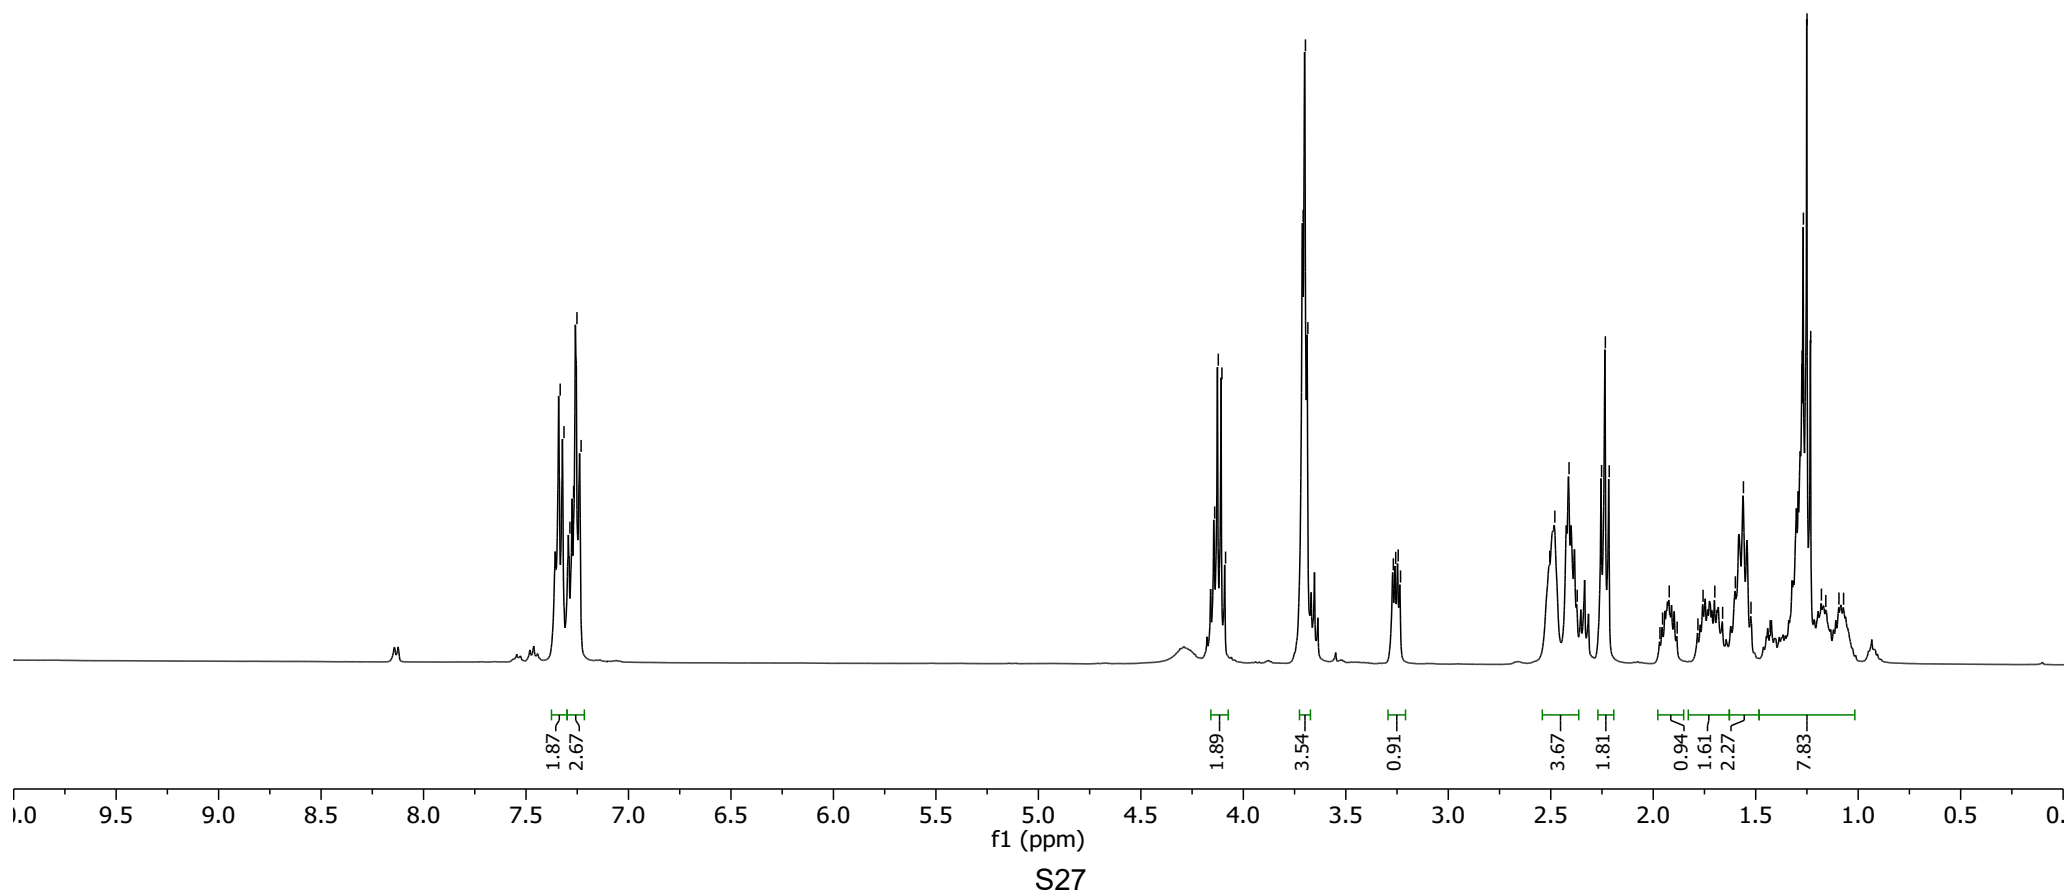

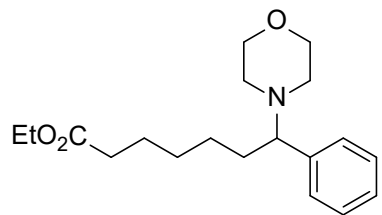

**5gba** (52%)

$^{13}\text{C}\{^1\text{H}\}$  NMR (100 MHz /  $\text{CDCl}_3$ )

— 173.77

— 140.18

— 128.72  
— 128.17  
— 127.25

— 70.60

— 67.14

— 60.20

— 51.08

— 34.28

— 32.14

— 29.22

— 25.91

— 24.84

— 14.29

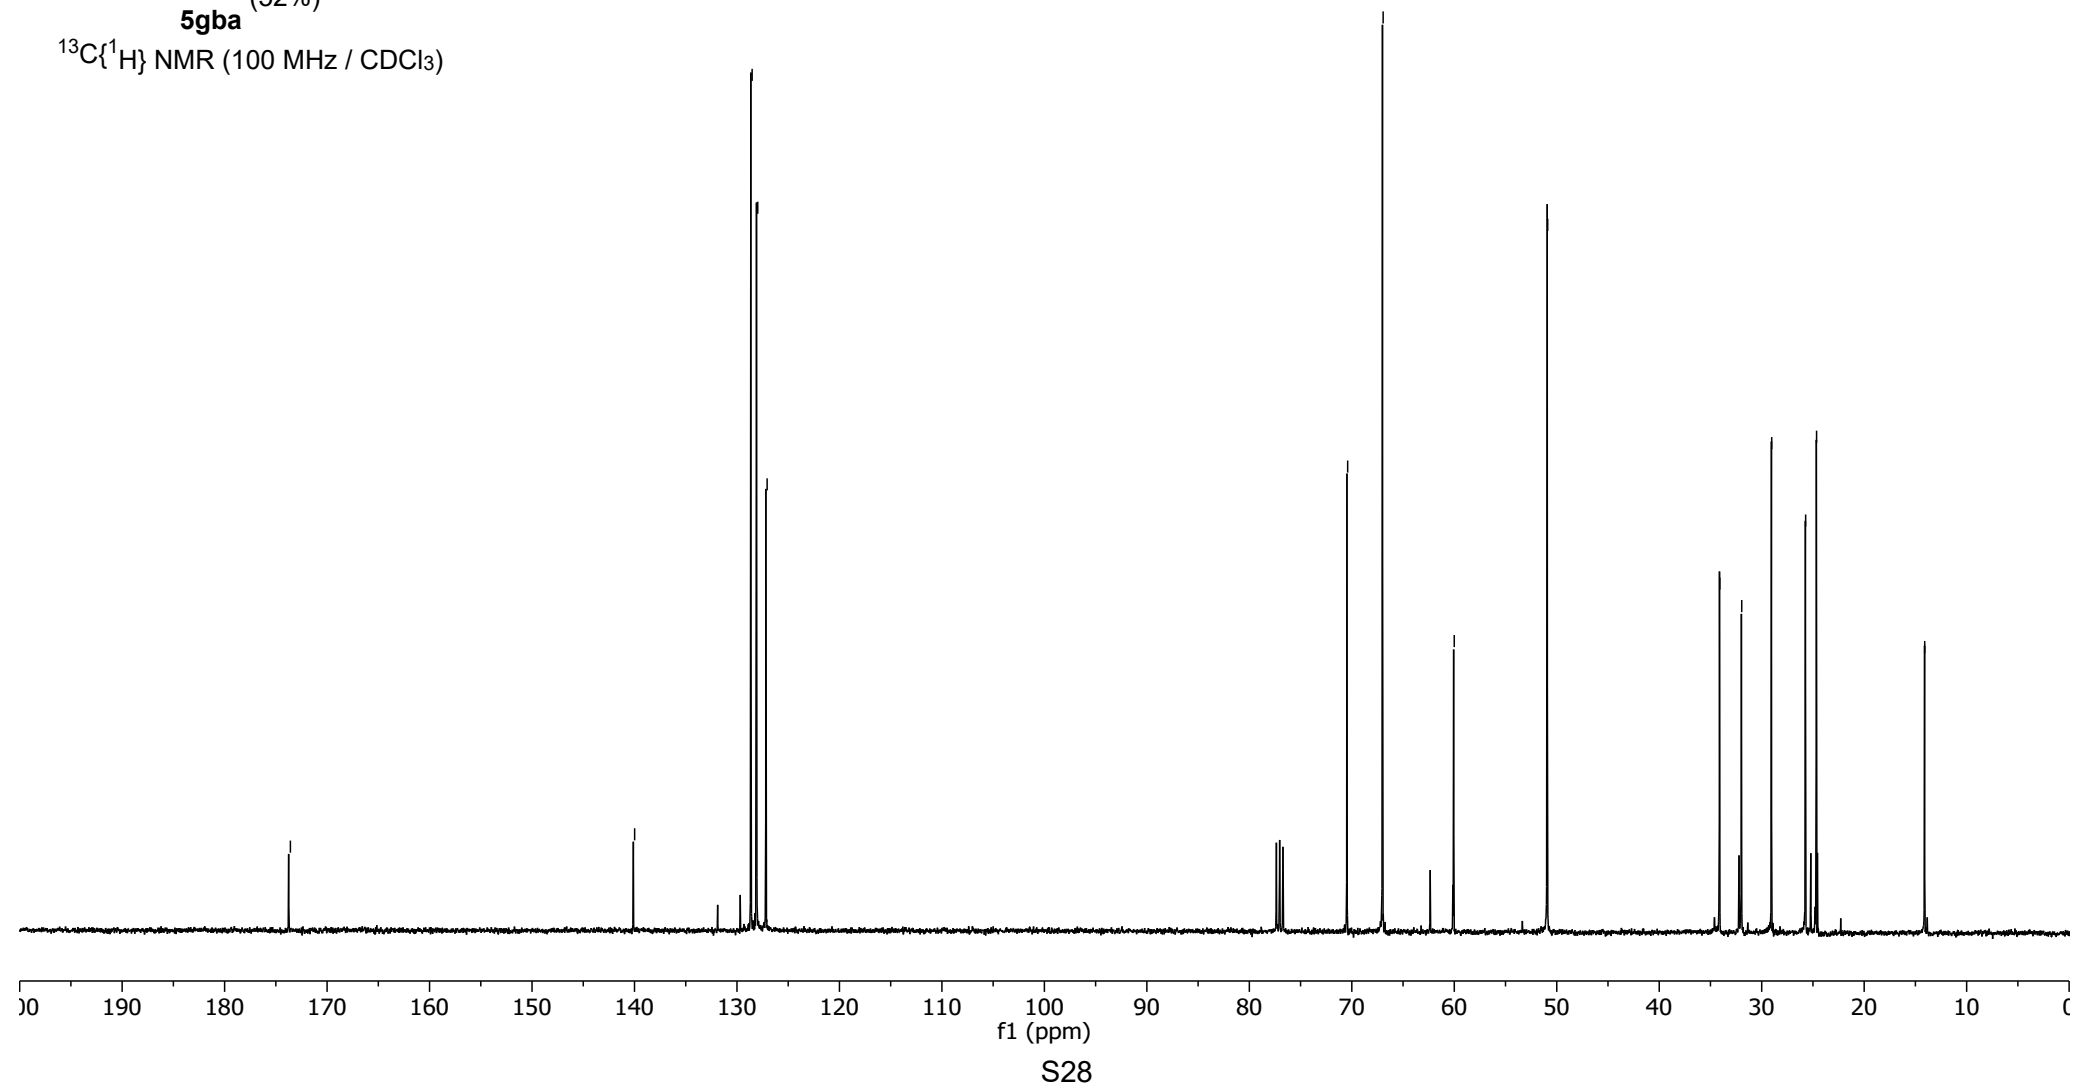

f1 (ppm)

S28

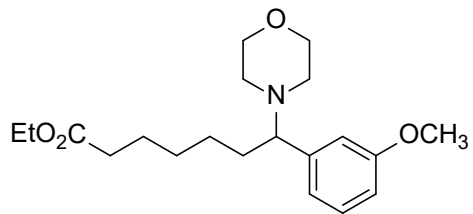

(59%)

**5gbf**

<sup>1</sup>H NMR (400 MHz / CDCl<sub>3</sub>)

7.20  
7.19  
7.16  
6.78  
6.76  
6.75  
6.75

4.09  
4.07  
4.05  
4.03  
3.77  
3.64  
3.63  
3.62

3.15  
3.14  
3.13  
3.12

2.42  
2.36  
2.35  
2.32  
2.20  
2.18  
2.16

1.87  
1.82  
1.65  
1.63  
1.60  
1.54  
1.53  
1.51  
1.49  
1.47  
1.25  
1.21  
1.20  
1.18  
1.13  
1.05  
1.02

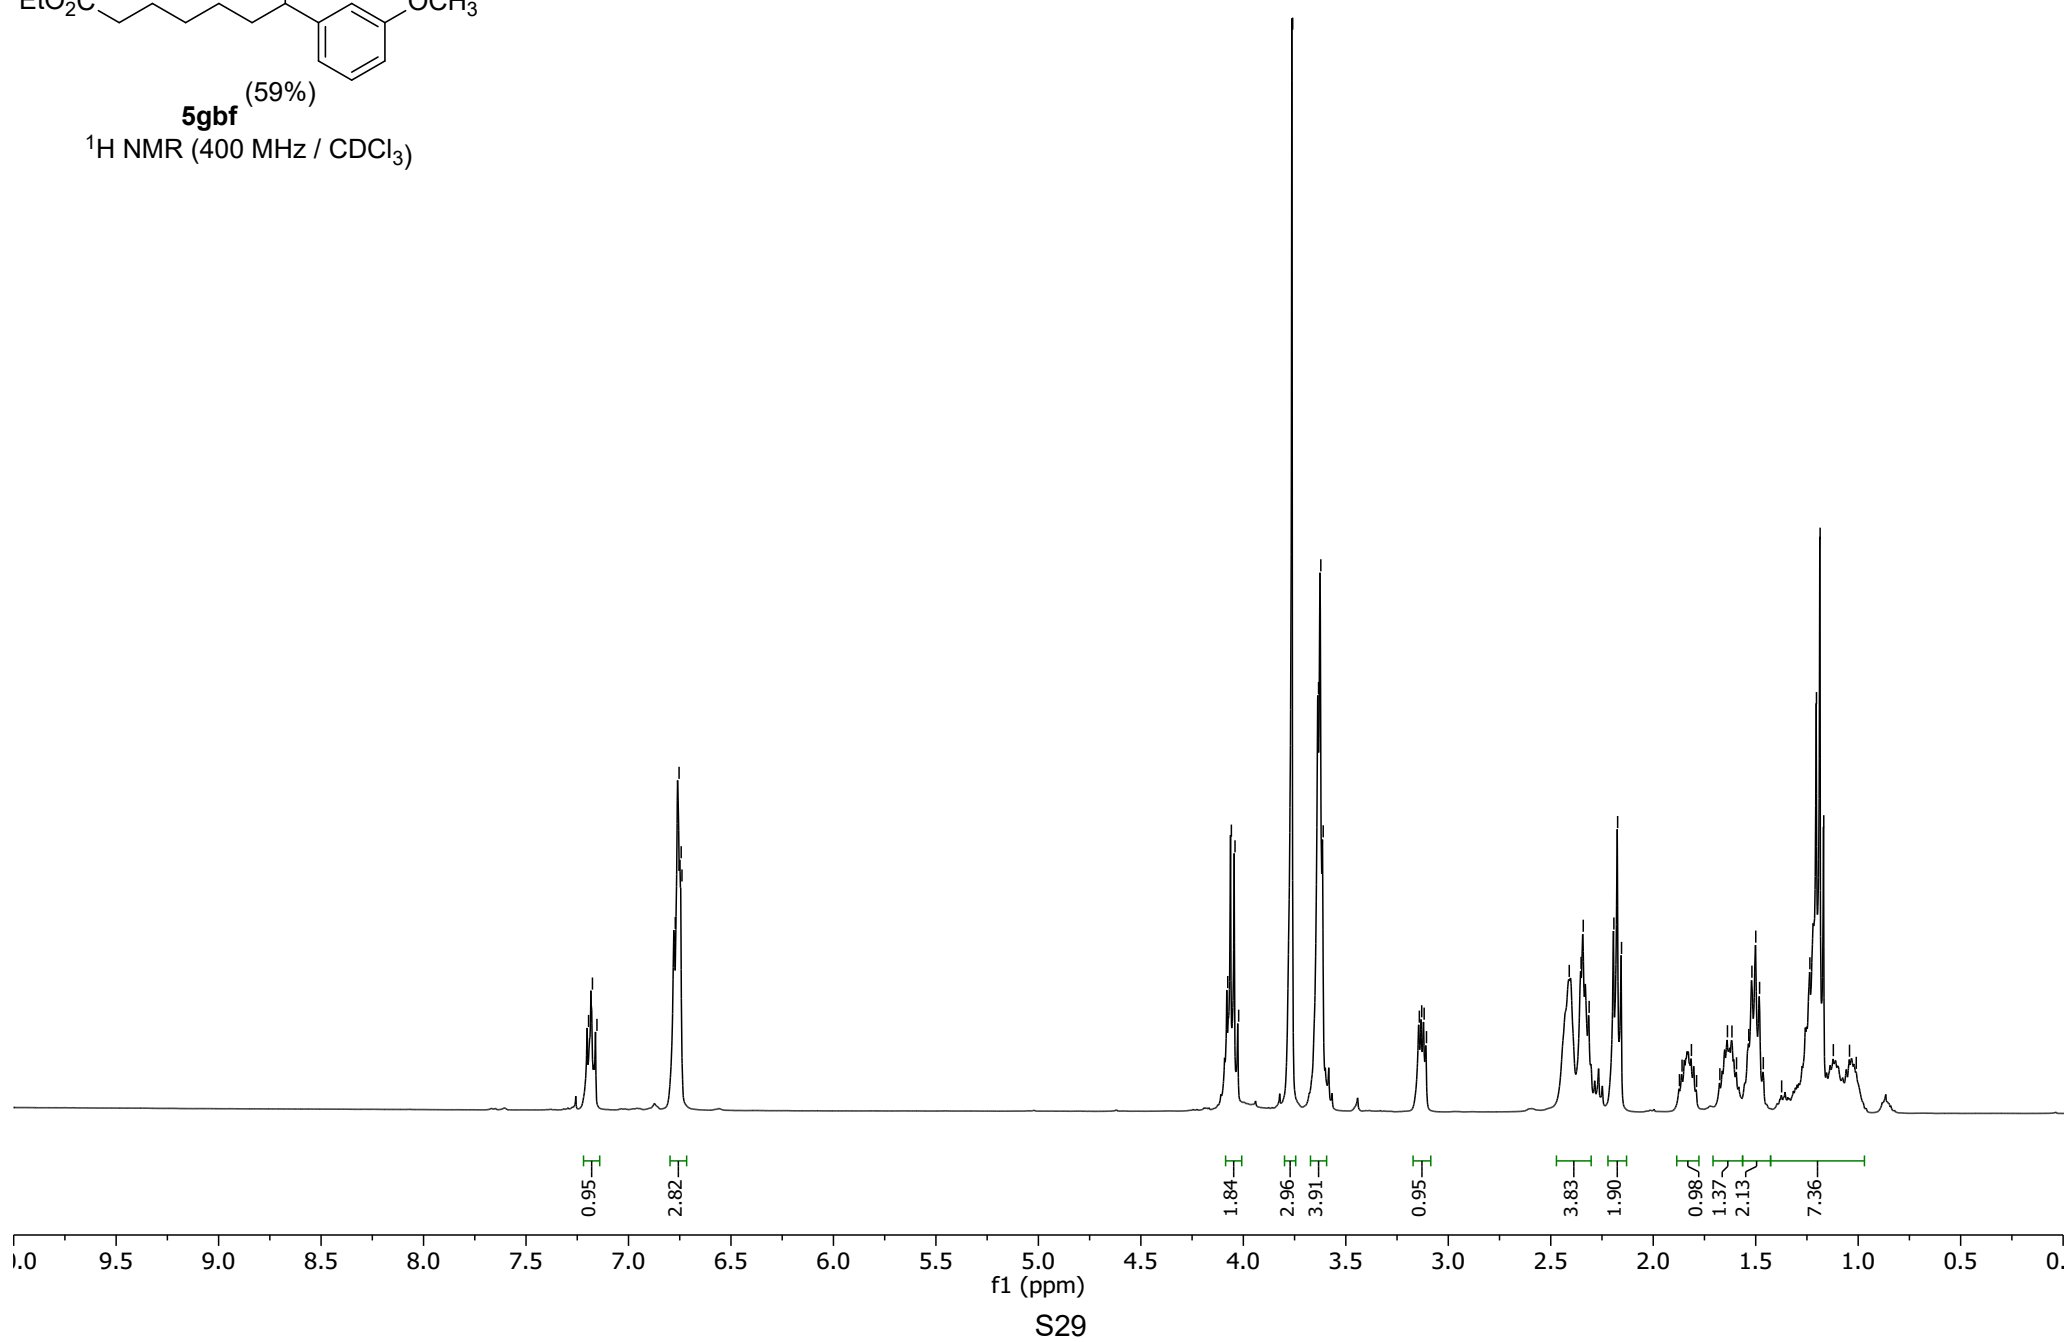

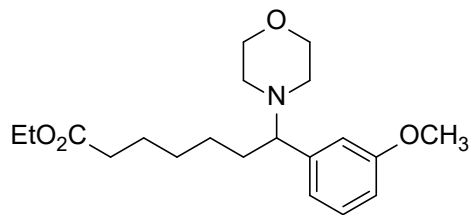

**5gbf**  
(59%)

$^{13}\text{C}\{^1\text{H}\}$  NMR (100 MHz /  $\text{CDCl}_3$ )

—173.73 —159.51 —142.21 —129.02 —121.15 —114.42 —112.12 —70.59 —67.19 —60.16 —55.18 —51.17 —34.26 —32.25 —29.23 —25.86 —24.83 —14.27

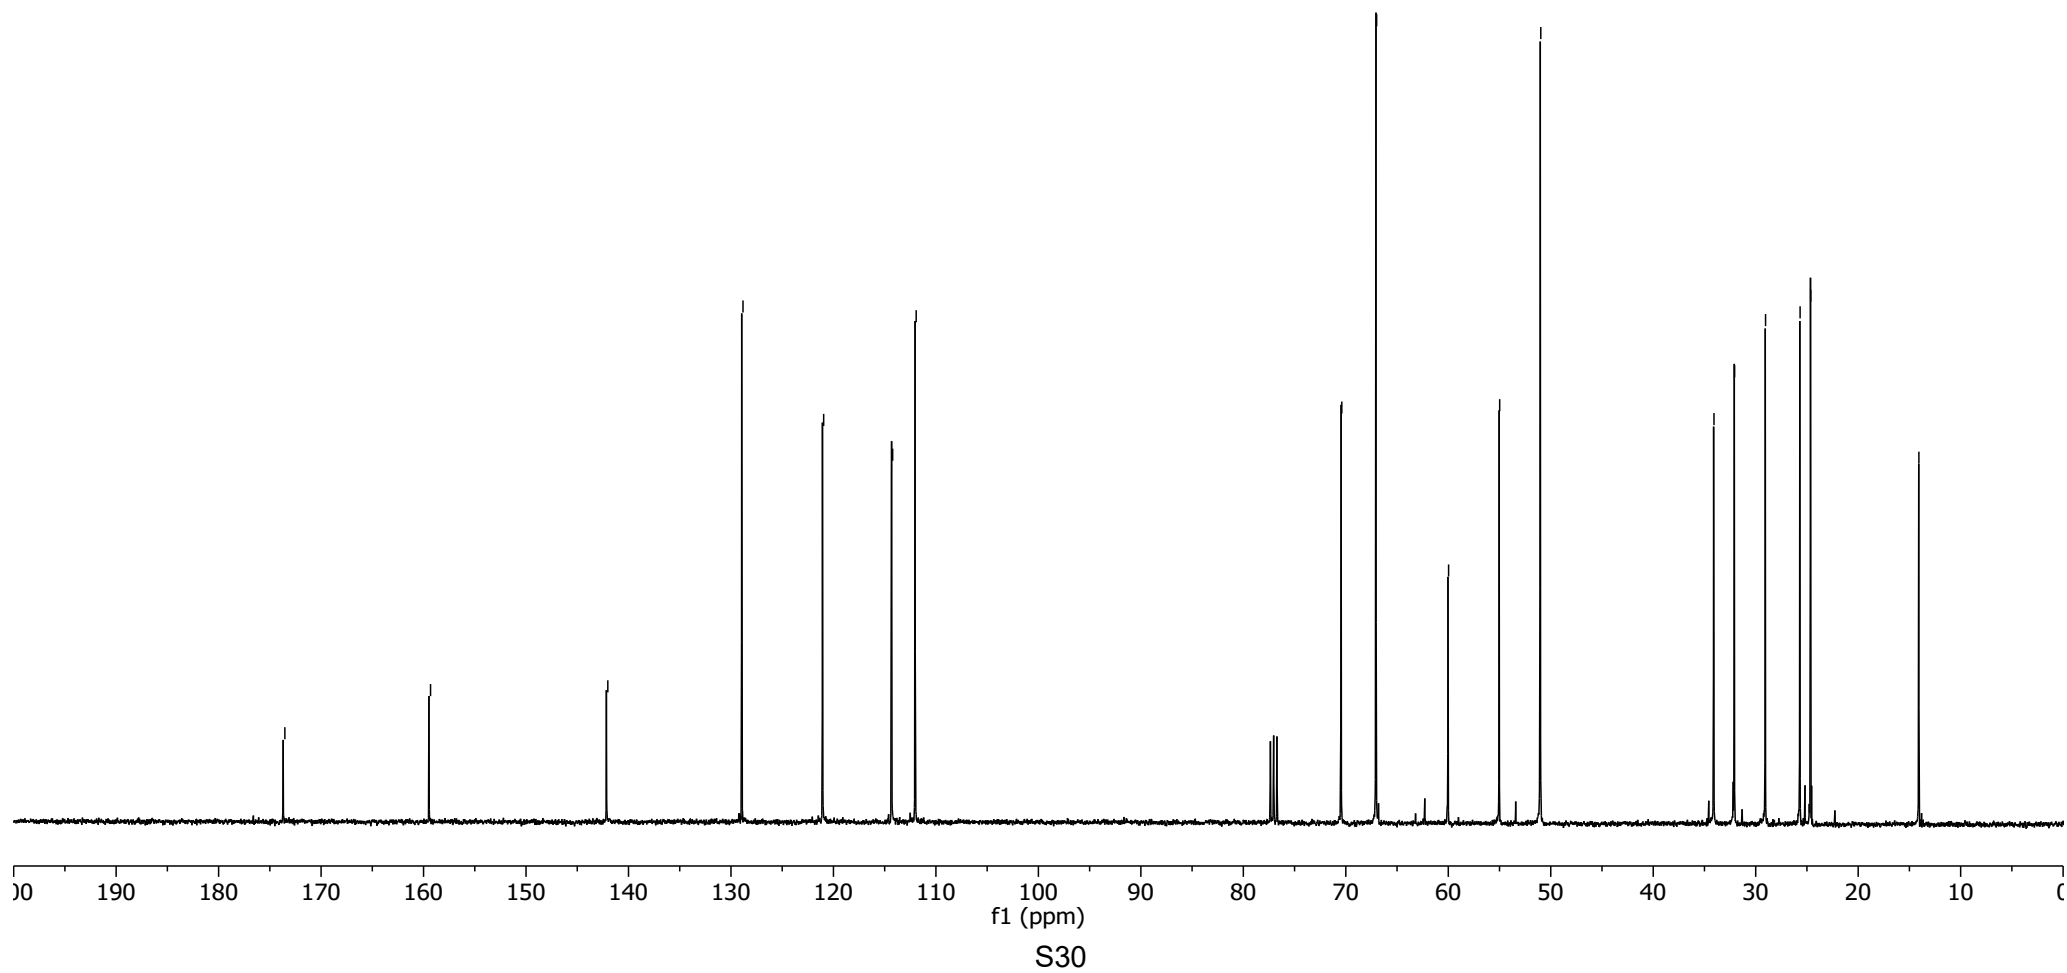

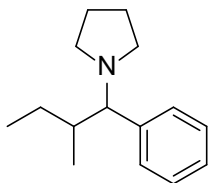

**5ida** (19%, d.r. = 1:1)

<sup>1</sup>H NMR (400 MHz / CDCl<sub>3</sub>)

7.34  
7.33  
7.32  
7.30  
7.28

3.20  
3.19  
3.15  
3.14  
2.56  
2.55  
2.48  
2.01  
1.99  
1.98  
1.90  
1.85  
1.82  
1.80  
1.78  
1.42  
1.37  
1.32  
1.31  
0.97  
0.96  
0.94  
0.92  
0.90  
0.89  
0.86  
0.84

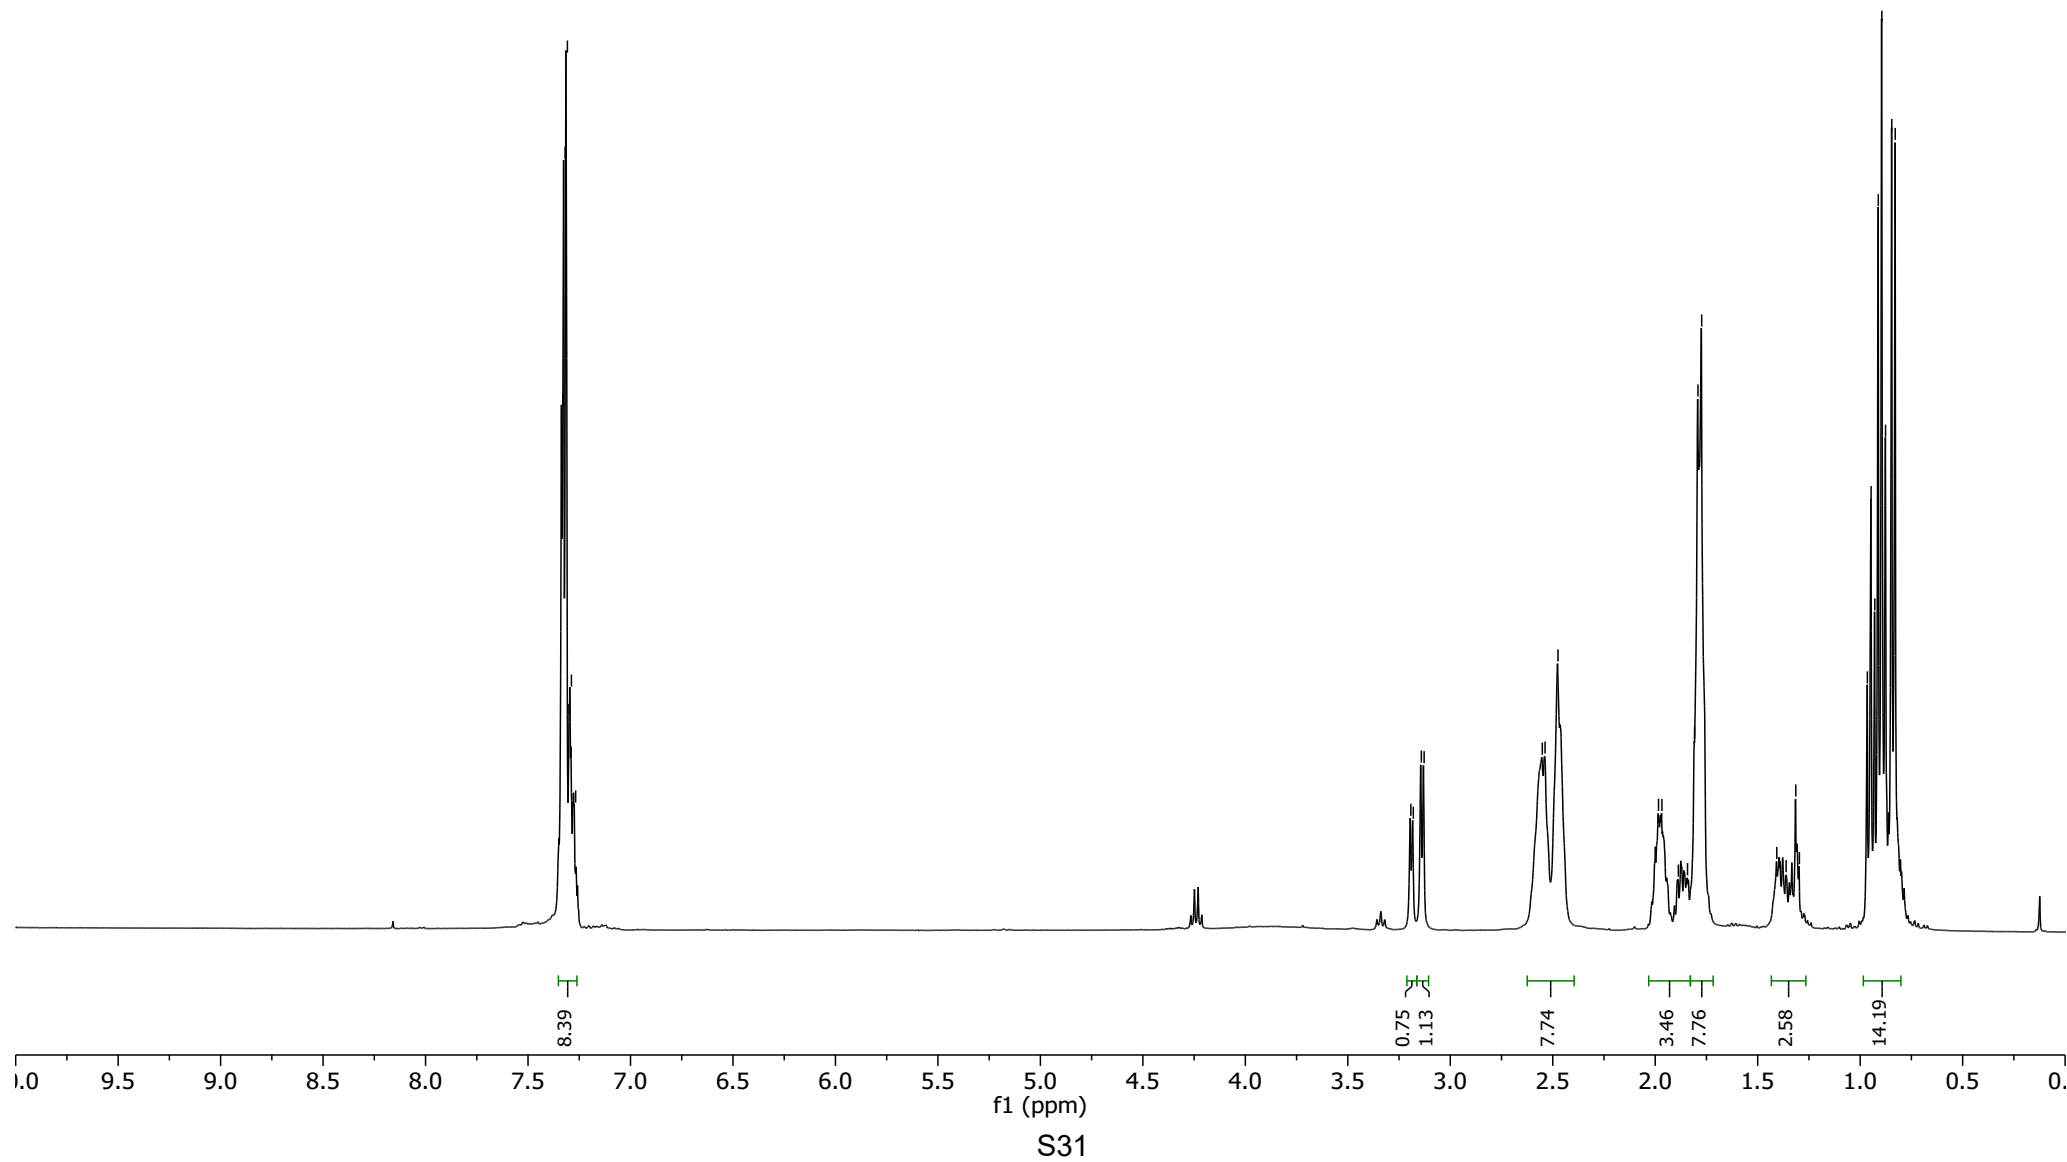



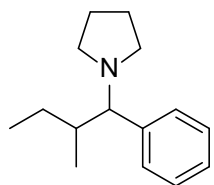

**5ida** (19%, d.r. = 1:1)

$^{13}\text{C}\{^1\text{H}\}$  NMR (100 MHz /  $\text{CDCl}_3$ )

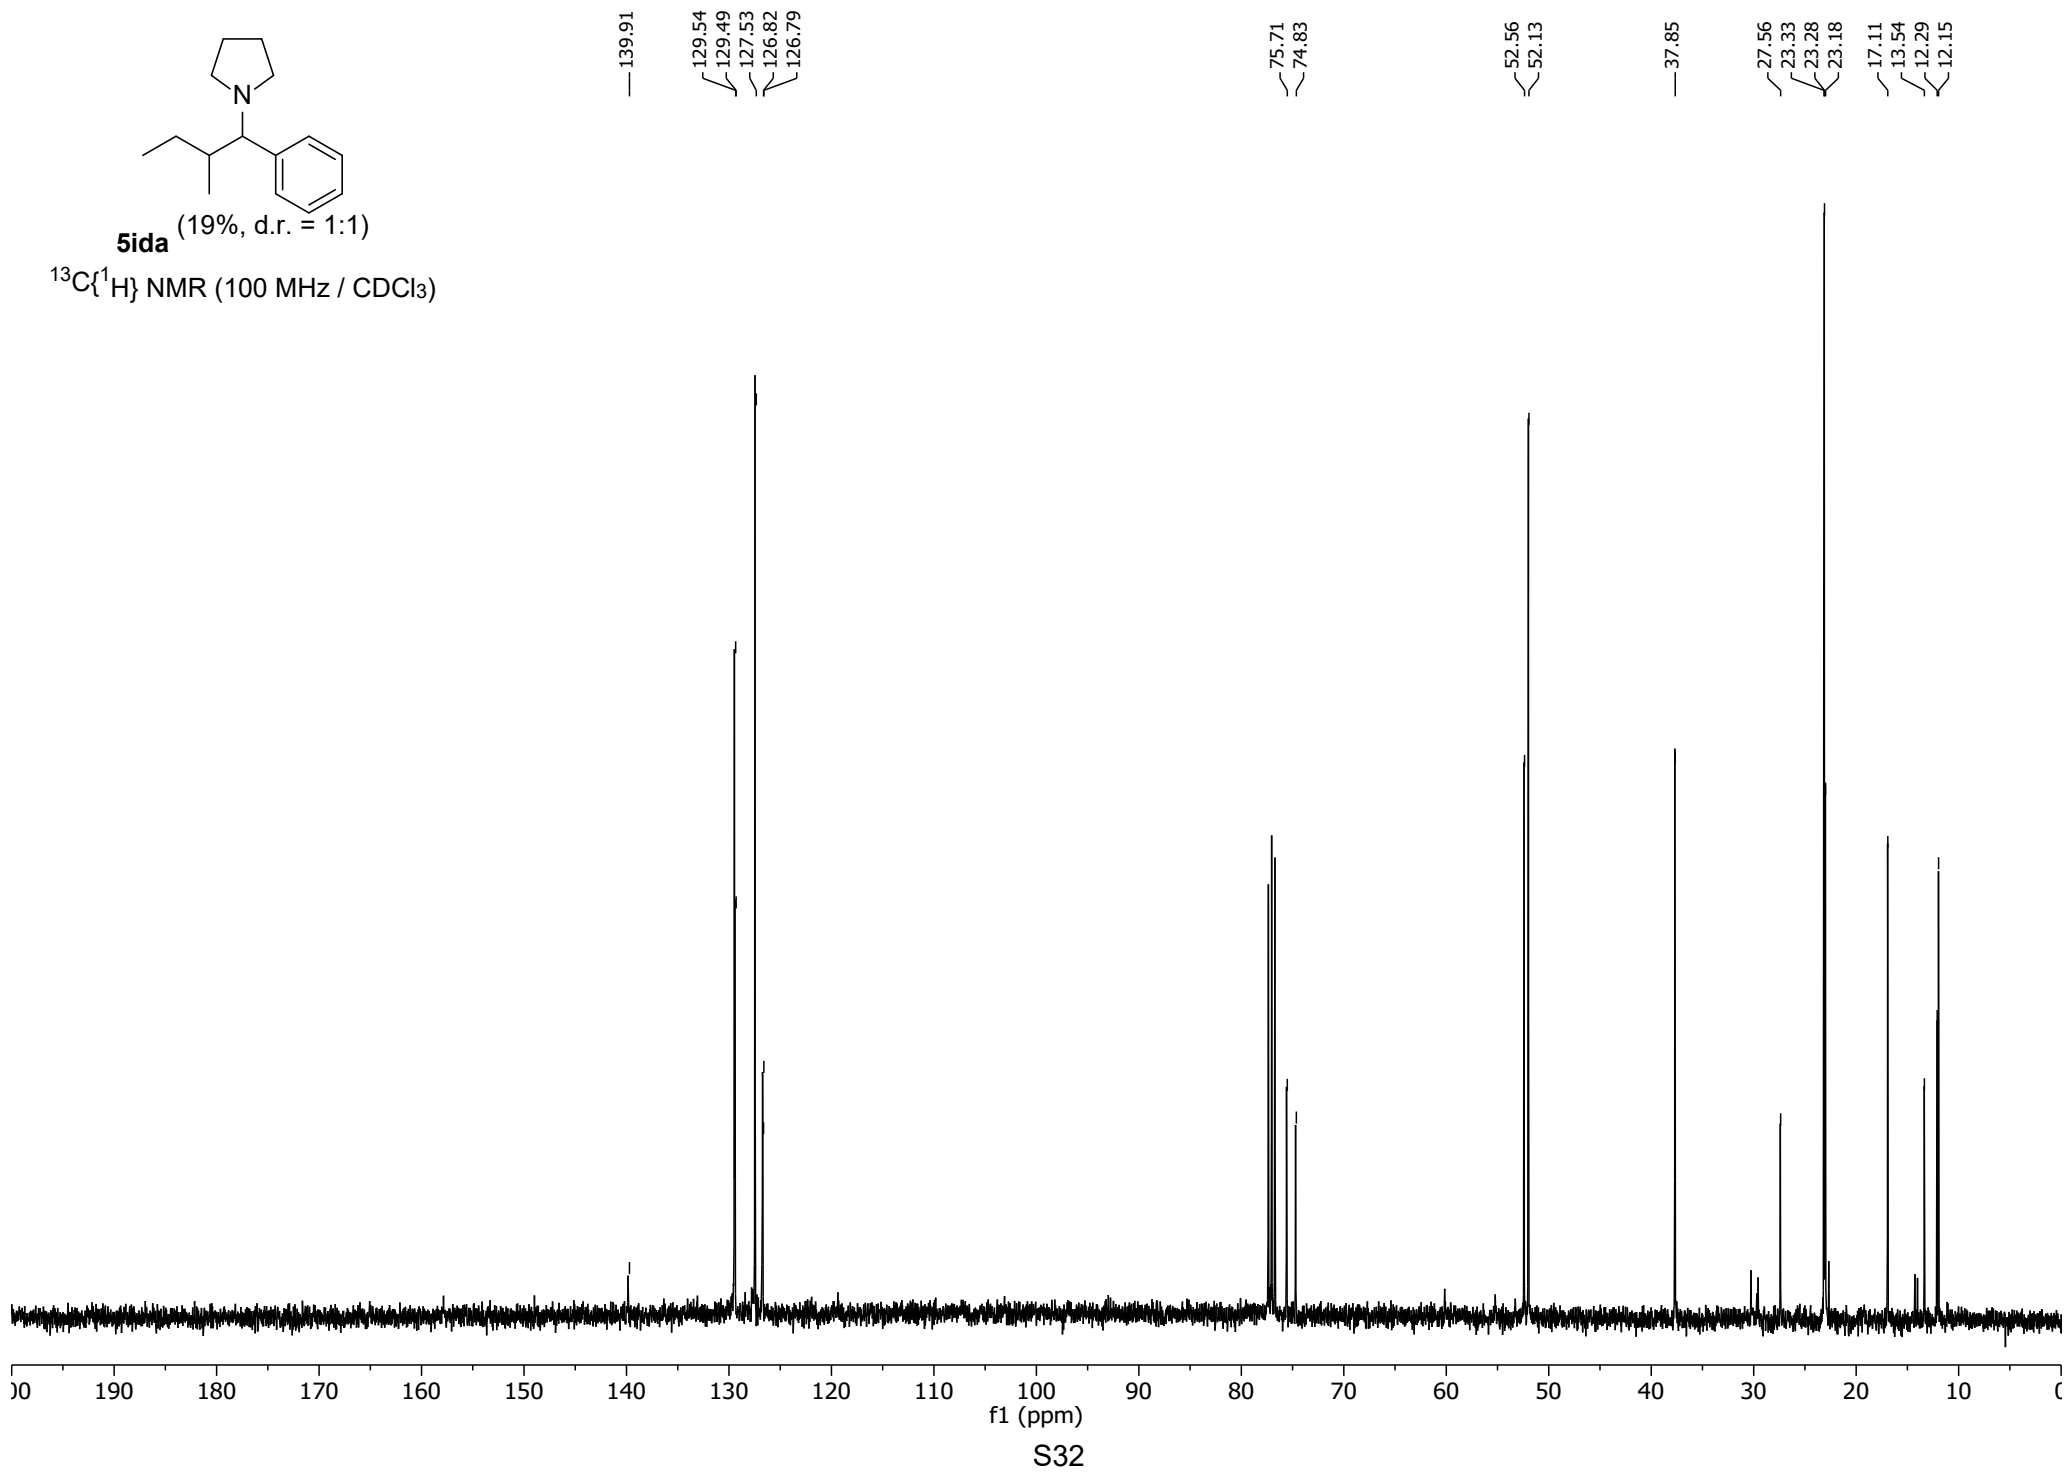

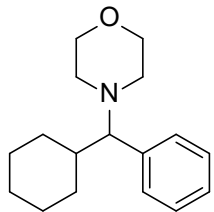

**5jba**

(38%)

$^1\text{H NMR}$  (400 MHz /  $\text{CDCl}_3$ )

7.38  
7.36  
7.34  
7.32  
7.30  
7.21  
7.19

3.74  
3.73  
3.71

3.15  
3.12

2.45  
2.43  
2.42  
2.41  
2.39  
2.37

2.03  
2.00  
1.99  
1.95  
1.83  
1.79  
1.71  
1.68  
1.61  
1.57  
1.54  
1.51  
1.49  
1.47  
1.45  
1.43  
1.41  
1.39  
1.37  
1.35  
1.33  
1.31  
1.29  
1.27  
1.25  
1.23  
1.21  
1.19  
1.17  
1.15  
1.13  
1.11  
1.09  
1.07  
1.05  
1.03  
1.01  
0.99  
0.97  
0.95  
0.93  
0.91  
0.89  
0.87  
0.85  
0.83

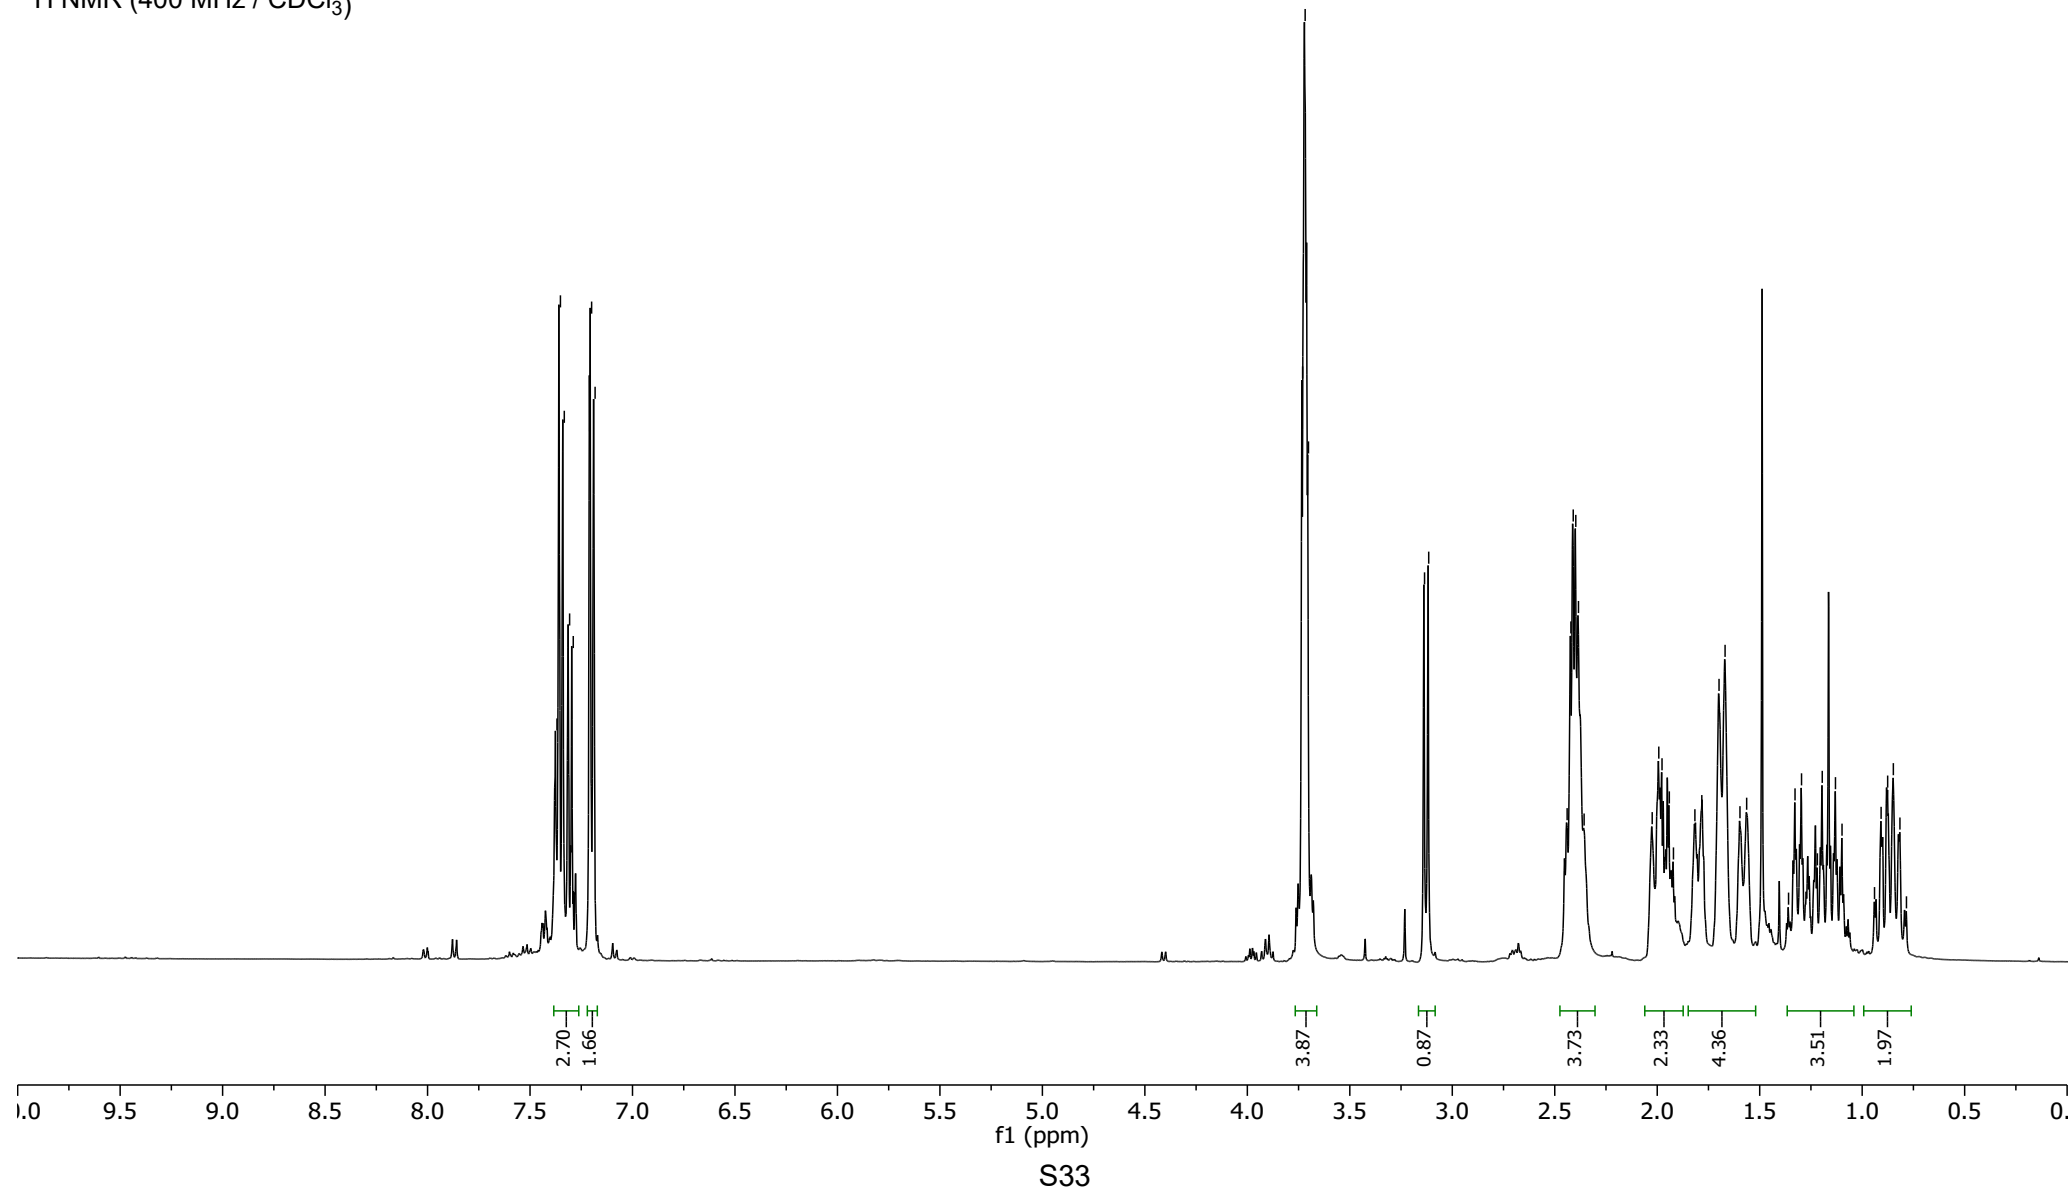

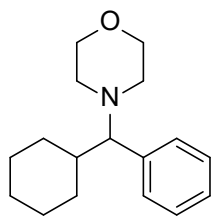

**5jba**

(38%)

$^{13}\text{C}\{^1\text{H}\}$  NMR (100 MHz /  $\text{CDCl}_3$ )

— 137.87

— 129.45

— 127.71

— 126.93

— 75.57

— 67.49

— 50.57

— 37.67

— 31.27

— 29.12

— 26.90

— 26.62

— 26.39

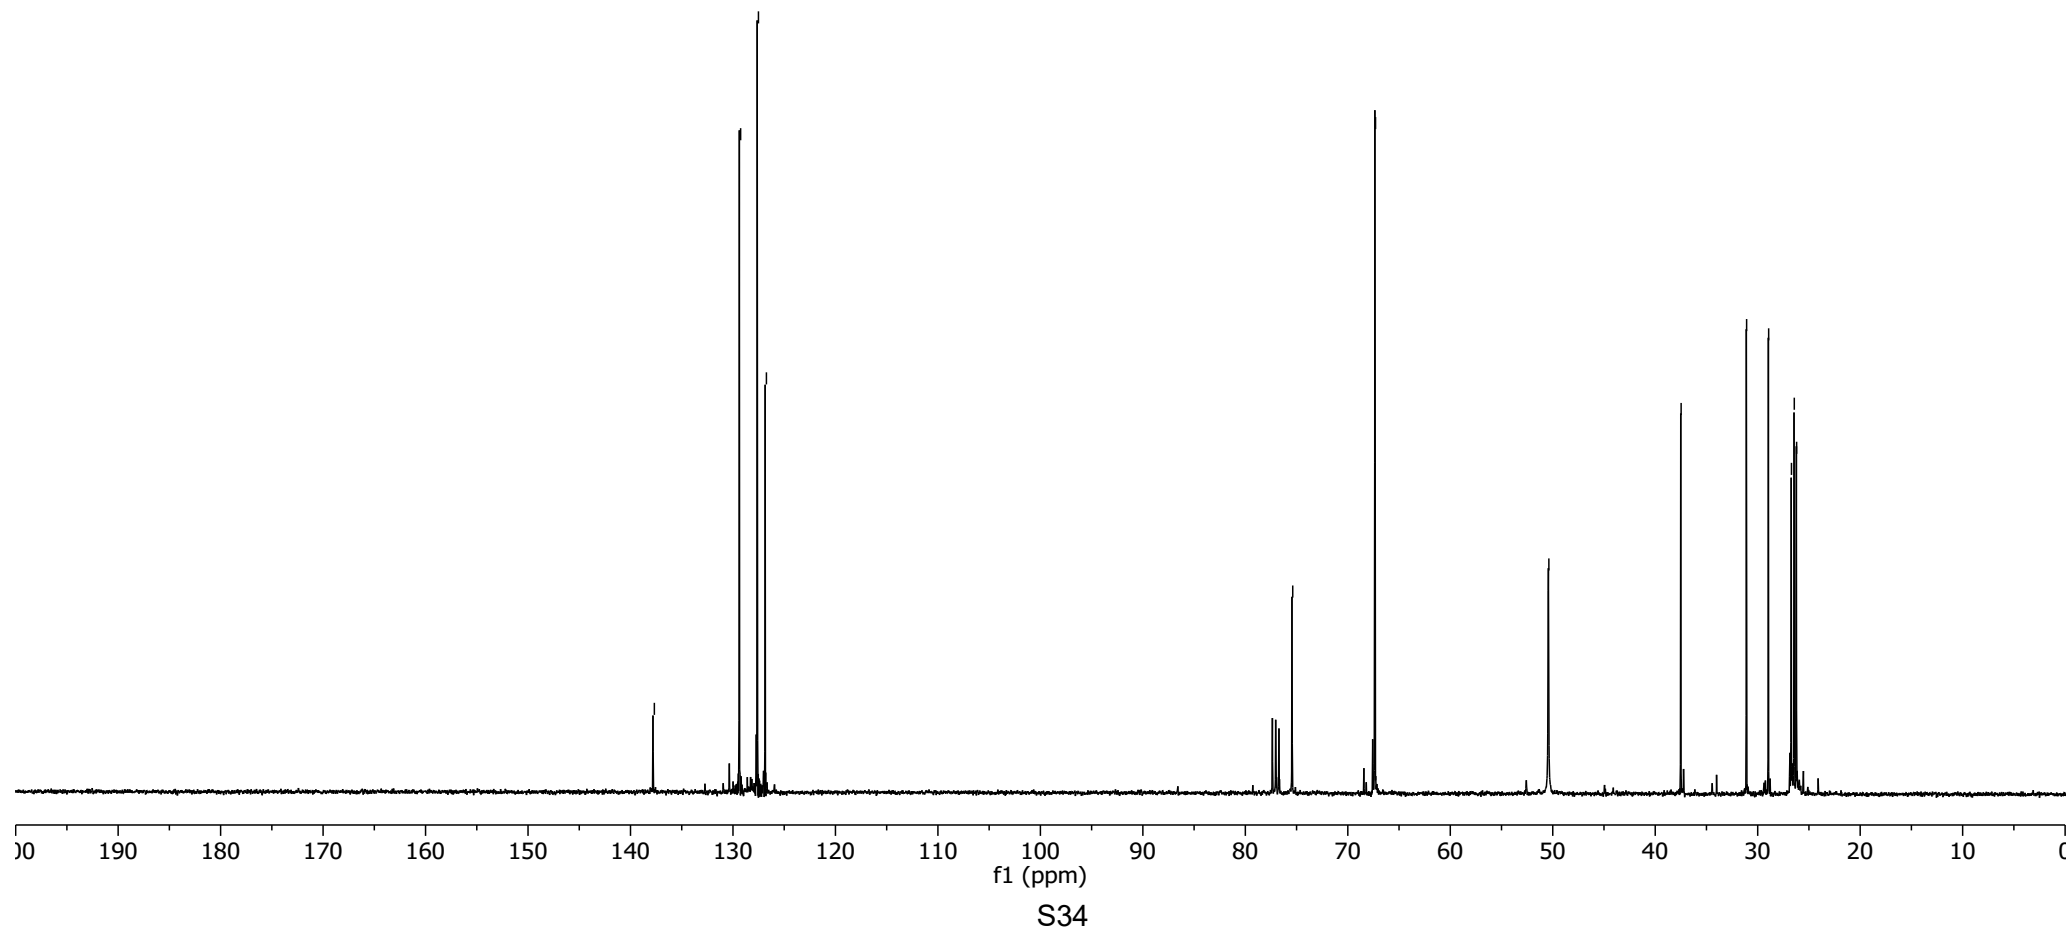

Supplement: Additional file 1 [file 1860-5397-20-239-S1.pdf]
